# Supplementary material for: Divergent pathways to furosesquiterpenes: first total syntheses of (+)-zedoarol and (Rac)-gweicurculactone
Source: Royal Society of Chemistry journal article supplement (doi:10.1039/c4cc09298h), 2014-12-17

# **Divergent Pathways to Furosesquiterpenes. First Total Syntheses of (+)-Zedoarol and (*Rac*)- Gweicurculactone.**

Elissavet E. Anagnostaki, Vera P. Demertzidou and Alexandros  
L. Zografos\*

*Contribution from the Department of Chemistry, Laboratory of Organic Chemistry,  
Aristotle University of Thessaloniki, University Campus, Thessaloniki 54124, Greece*

*Corresponding Author e-mail: [alzograf@chem.auth.gr](mailto:alzograf@chem.auth.gr)*

## **Supporting Information**

## Table of contents

|      |                                                              |           |
|------|--------------------------------------------------------------|-----------|
| I.   | General Information                                          | S3        |
| II.  | Experimental procedures and physical properties of compounds | S4 – S10  |
| III. | Comparison of synthetic and natural compounds                | S11 – S12 |
| IV.  | NMR spectra of compounds                                     | S13 – S51 |

## I. General Information

All reactions were carried out under an argon atmosphere with dry solvents under anhydrous conditions. Dry diethyl ether (Et<sub>2</sub>O), and tetrahydrofuran (THF), were obtained by refluxing the solvents with sodium and benzophenone for several hours whereas methylene chloride (CH<sub>2</sub>Cl<sub>2</sub>) was dried by distillation from CaH<sub>2</sub>. The solvents were kept under argon using molecular sieves 4Å in their bottles. Reagents were purchased at the highest commercial quality and used without further purification.

Reactions were monitored by thin-layer chromatography (TLC) carried out on S-2 0.25 mm E. Merck silica gel plates (60F-254) using UV light as visualizing agent and ethanolic *p*-anisaldehyde as developing agent. E. Merck silica gel (60, particle size 0.040–0.063 mm) was used for flash column chromatography. Silica gel was neutralized with 1% Et<sub>3</sub>N and used in all indicative cases where compounds are sensitive to acidic conditions. Preparative thin-layer chromatography separations were carried out on 0.25 or 0.50 mm E. Merck silica gel plates (60F-254).

NMR spectra were recorded on Brüker 300 AM and Agilent 500 spectrometer and calibrated using TMS as an internal reference. The following abbreviations are used to designate multiplicities: s = singlet, d = doublet, t = triplet, q = quartet, m = multiplet, br = broad, brd = broad doublet, brt = broad triplet, pst = pseudo triplet. High-resolution mass spectra (HRMS) were recorded on an Agilent ESI-TOF (time of flight) mass spectrometer at a 4000 V emitter voltage. Optical rotations were recorded on a Perkin-Elmer Model 343 polarimeter at 589 nm, and are reported in units of 10<sup>-1</sup>(deg cm<sup>2</sup> g<sup>-1</sup>).

## II. Experimental procedures and physical properties of compounds

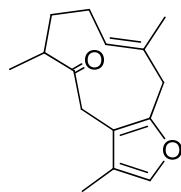

**2**

### (R,S)-furanogermenone (**2**)

In a well-dried schlenk tube a solution of compound **1**<sup>1</sup> (235 mg, 1.00 mmol) in dry THF (7ml) was introduced and deoxygenated in high vacuum with the aid of liquid nitrogen. Then oil free KH (40mg, 1.00 mmol) was added at once and the mixture was immediately capped and heated for 10 min at 65 °C. The mixture was cooled down at room temperature and quenched by the addition of 5 ml of saturated aqueous ammonium chloride. The aqueous layer was extracted with Et<sub>2</sub>O (3 X 10 ml) and the combined organic extracts were dried over anhydrous sodium sulfate, filtered and concentrated *in vacuo*. Purification by neutralized silica gel flash column chromatography (petroleum/ Et<sub>2</sub>O = 100:1) gave **2** (193 mg, 82%) as a white solid. Compound **2** lacks of optical activity. R<sub>f</sub> = 0.30 (petroleum/ Et<sub>2</sub>O = 3:1). <sup>1</sup>H NMR (300 MHz, CDCl<sub>3</sub>): δ = 7.09 (brs, 1H), 5.14 (brt, 1H), 3.44 (d, J = 15Hz, 1H), 3.41 – 3.30 (m, 1H), 3.21 (brd, J = 15Hz, 2H), 2.60 – 2.46 (m, 1H), 2.31 – 2.06 (m, 2H), 2.02 – 1.88 (m, 1H), 1.88 (s, 3H), 1.82 – 1.76 (m, 1H), 1.69 (brs, 3H), 1.08 (d, J = 6Hz, 3H); <sup>13</sup>C NMR (75 MHz, CDCl<sub>3</sub>): δ = 213.3, 148.8, 136.5, 131.8, 131.7, 121.9, 113.7, 47.3, 38.4, 36.4, 36.3, 29.6, 18.3, 17.3, 8.12.

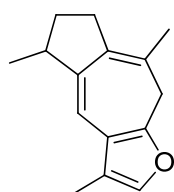

**3**

### Compound **3**

In a well-dried schlenk tube, a solution of compound **1**<sup>1</sup> (235 mg, 1.00 mmol) in dry THF (7 ml) was introduced and deoxygenated in high vacuum with the aid of liquid nitrogen. In the resulting solution a 1M solution of KHMDS in toluene (1ml, 1.00 mmol) was introduced and the schlenk was capped and heated to 90 °C for 10 min. The mixture was cooled down at room temperature and quenched by the addition of 5 ml of saturated aqueous ammonium chloride. The aqueous layer was extracted with Et<sub>2</sub>O (3 X 10 ml) and the combined organic extracts were dried over anhydrous sodium sulfate, filtered and concentrated *in vacuo*.

Purification by neutralized silica gel flash column chromatography (petroleum/ Et<sub>2</sub>O = 100:1) provided compound **3** as a yellow oil (139 mg, 65%). R<sub>f</sub> = 0.73 (petroleum/ Et<sub>2</sub>O = 3:1). Compound **3** was obtained as racemic mixture. <sup>1</sup>H NMR (500 MHz, CDCl<sub>3</sub>): δ = 7.18 (brs, 1H) 6.36 (brs, 1H), 3.09 [d, (a,b system), J = 15.8Hz, 1H], 2.94 [d, (a,b system), J = 15.8Hz, 1H], 2.79 – 2.76 (m, 1H), 2.57 – 2.51 (m, 1H), 2.48 – 2.41 (m, 1H), 2.15 – 2.11 (m, 1H), 2.01 (brs, 3H), 1.97 (d, J = 1.2Hz, 3H), 1.47 – 1.40 (m, 1H), 1.12 (d, J = 7Hz, 3H) ; <sup>13</sup>C NMR (125 MHz, CDCl<sub>3</sub>): δ = 150.4, 140.5, 139.3, 135.0, 133.3, 119.4, 117.3, 116.0, 44.5, 33.4, 31.2, 23.2, 21.4, 19.6, 7.9; HRMS: calcd for C<sub>15</sub>H<sub>19</sub>O<sup>+</sup> [M + H<sup>+</sup>]: 215.1436, found 215.1439.

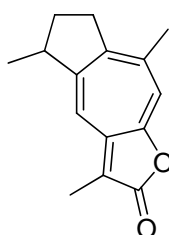

#### Gweicurculactone (**4**)

##### Racemic (R,S)-Gweicurculactone (**4**)

A solution of compound **3** (30 mg, 0.14 mmol) in DCM was stirred at room temperature for 1 day before evaporated to dryness and purified by neutralized silica gel flash column chromatography (petroleum/ Et<sub>2</sub>O = 30:1) Racemic compound **4** (11 mg, 35%) was obtained as a reddish solid which was found to be identical to the natural substance<sup>2</sup> except from its optical rotation. <sup>1</sup>H NMR (500 MHz, CDCl<sub>3</sub>): δ = 6.86 (s, 1H) 6.70 (s, 1H), 3.10 – 3.00 (m, 1H), 2.84 – 2.74 (m, 1H), 2.71 – 2.61 (m, 1H), 2.21 (s, 3H), 2.14 – 2.05 (m, 1H), 1.95 (s, 3H), 1.51 (m, 1H), 1.28 (d, J = 4.8 Hz, 3H) ; <sup>13</sup>C NMR (125 MHz, CDCl<sub>3</sub>): δ = 170.7, 156.7, 154.9, 146.3, 144.3, 136.6, 118.0, 116.4, 103.7, 44.0, 33.8, 32.1, 24.8, 20.2, 7.8; HRMS: calcd for C<sub>15</sub>H<sub>17</sub>O<sub>2</sub><sup>+</sup> [M + H<sup>+</sup>]: 229.1228, found 229.1223.

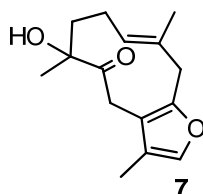

##### (R,S)-5-Hydroxy-furanogermanone (**7**)

In a well-dried schlenk tube, a solution of compound **1**<sup>1</sup> (50 mg, 0.22 mmol) in dry THF (7 ml) was introduced and it was saturated with dry oxygen gas (passed through anhydrous CaCl<sub>2</sub>). In the resulting solution, oil free KH (9 mg, 0.22 mmol) was added at once and the mixture was immediately capped and heated for 10 min at 65 °C. The mixture was cooled down at

room temperature and quenched by the addition of 5 ml of saturated aqueous ammonium chloride. The aqueous layer was extracted with Et<sub>2</sub>O (3 X 10 ml) and the combined organic extracts were dried over anhydrous sodium sulfate, filtered and concentrated *in vacuo*. Purification by neutralized silica gel flash column chromatography (petroleum/ Et<sub>2</sub>O = 50:1) gave **7** (24 mg, 45%) as a colourless oil. Compound **7** was obtained as racemic mixture. R<sub>f</sub> = 0.13 (petroleum/ Et<sub>2</sub>O = 3:1). <sup>1</sup>H NMR (300 MHz, CDCl<sub>3</sub>): δ = 7.13 (brs, 1H), 5.27 (brt, 1H), 4.23 – 3.96 (m, 1H), 3.92– 3.69 (m, 1H), 3.47– 3.04 (m, 3H), 2.43 – 2.02 (m, 4H), 1.91 (s, 3H), 1.40 (brs, 3H); <sup>13</sup>C NMR (75 MHz, CDCl<sub>3</sub>): δ = 211.5, 148.8, 136.8, 132.5, 130.5, 122.4, 113.6, 78.6, 39.0, 31.1, 28.0, 27.1, 22.5, 17.1, 8.0; HRMS: calcd for C<sub>15</sub>H<sub>21</sub>O<sub>3</sub><sup>+</sup> [M + H<sup>+</sup>]: 249.1490, found 249.1487.

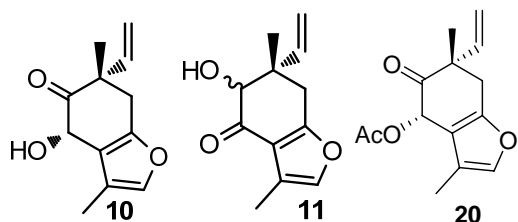

#### Compound **10** and mixture of compounds **11**

To a stirred solution of compound **9**<sup>1</sup> (100 mg, 0.52 mmol) in dry THF (2 ml) was added a solution of 1M LiHMDS in THF (0.48 ml, 0.48mmol) under argon atmosphere at -78 °C. After 30 min, R(-)-10-camphorosulphonyl oxaziridine (108 mg, 0.48 mmol) dissolved in dry THF (0.5 ml) was added at the same temperature and the resulting solution was stirred for 45 min at the same temperature. Then the reaction mixture was quenched by the addition of 1.5 ml saturated aqueous sodium thiosulphate and the aqueous layer was extracted with Et<sub>2</sub>O (3 X 8 ml). The combined organic extracts are dried over anhydrous sodium sulfate, filtered and concentrated *in vacuo*. Purification by silica gel flash column chromatography (petroleum/ Et<sub>2</sub>O = 50:1) provided compound **10** (54 mg, 52%) as a pale yellow oil. The compound was readily transformed to its regioisomeric compounds **11** over 2h at rt or within few minutes when dissolved in CDCl<sub>3</sub>. R<sub>f</sub> = 0.48 (petroleum/ Et<sub>2</sub>O = 3:1). <sup>1</sup>H NMR (500 MHz, CDCl<sub>3</sub>): δ = 7.11 (s, 1H), 5.96 (dd, *J* = 17.4Hz, 10.7Hz, 1H), 5.21 (d, *J* = 10.7Hz, 1H), 5.18 (d, *J* = 17.4Hz, 1H), 3.37 (s, 1H), 3.05 [d, (a,b system), *J* = 1.4Hz, 1H], 2.85 [d, (a,b system), *J* = 1.4Hz, 1H], 2.08 (s, 3H), 1.36 (s, 3H). Its stereochemistry was elucidated by NOESY NMR spectroscopy of its acetyl derivative **21**. Acetyl derivative also fails to give a stable compound and also readily transforms to a mixture of acetylated compounds. For acetyl derivative **20**: Compound **10** (20 mg, 0.10 mmol) was dissolved in DCM (1 ml) and treated with Ac<sub>2</sub>O (46 μL, 0.50 mmol) at rt for 6h. The resulting mixture was quenched with water and extracted with Et<sub>2</sub>O (3 X 8 ml).

The combined organic extracts are dried over anhydrous sodium sulfate, filtered and concentrated *in vacuo*. Purification by silica gel flash column chromatography (petroleum/Et<sub>2</sub>O = 50:1) provided **20** (21 mg, 85%) as a pale yellow oil. R<sub>f</sub> = 0.62 (petroleum/ Et<sub>2</sub>O = 3:1) <sup>1</sup>H NMR (500 MHz, CDCl<sub>3</sub>): δ = 7.12 (s, 1H), 6.30 (d, *J* = 5 Hz, 1H), 5.92 (dd, *J* = 20 Hz, 10 Hz, 1H), 5.21 (d, *J* = 10Hz, 1H), 5.17 (d, *J* = 20Hz, 1H), 3.03 [d, (a,b system), *J* = 20Hz, 1H], 2.85 [d, (a,b system), *J* = 20Hz, 1H], 2.19 (s, 3H), 1.92 (s, 3H), 1.32 (s, 3H); HRMS: calcd for C<sub>14</sub>H<sub>17</sub>O<sub>4</sub><sup>+</sup> [M + H<sup>+</sup>]: 249.1127, found 249.1119.

For compounds **11** (mixture of isomers almost 1:1 ratio): <sup>1</sup>H NMR (500 MHz, CDCl<sub>3</sub>): δ = 7.14 (s, 1H), 7.11 (s, 1H), 6.13 (dd, *J* = 20Hz, *J* = 15Hz, 1H), 5.80 (dd, *J* = 20Hz, *J* = 10Hz, 1H), 5.22 (m, 1H), 5.03 (d, *J* = 11Hz, 1H), 4.98 (d, *J* = 18Hz, 1H), 4.17 (brs, 1H), 3.8 (brs, 1H), 3.06 [d, (a,b system), *J* = 17Hz, 1H], 2.78 [d, (a,b system), *J* = 17Hz, 1H], 3.03 [d, (a,b system), *J* = 17Hz, 1H], 2.91 [d, (a,b system), *J* = 17Hz, 1H], 2.2 (s, 3H), 2.18 (s, 3H), 1.43 (s, 1H), 1.03 (s, 1H); <sup>13</sup>C NMR (75 MHz, CDCl<sub>3</sub>): δ = 193.9, 193.9, 165.7, 165.5, 143.8, 140.3, 140.1, 138.0, 119.0, 118.9, 118.3, 117.5, 115.4, 113.5, 80.2, 78.7, 46.8, 46.5, 35.2, 35.0, 25.6, 16.3, 8.7, 8.6.

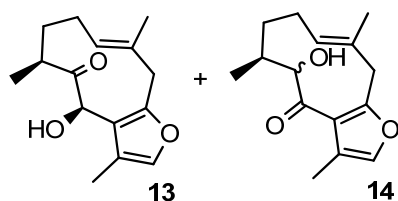

#### 7-hydroxy-furanogermenone (**13**) and compounds **14**

To a stirred solution of furanogermenone (**2**) (48 mg, 0.21 mmol) in dry THF (2 ml) was added a 1.6M solution of *n*BuLi in pentane (0.15 ml, 0.25 mmol) under argon atmosphere at -78 °C. After 40 min, the solution was warmed to rt for 15 min before R(-)-10-camphorosulphonyl oxaziridine (56 mg, 0.25 mmol) dissolved in dry THF (0.5 ml) introduced to the reaction mixture at -78 °C. The reaction was stirred for 45 min at the same temperature. Then, the reaction mixture was quenched by the addition of 1.5 ml saturated aqueous sodium dicarbonate and the aqueous layer was extracted with Et<sub>2</sub>O (3 X 7 ml). The combined organic extracts were dried over anhydrous sodium sulfate, filtered and concentrated *in vacuo*. Purification by silica gel flash column chromatography (petroleum/Et<sub>2</sub>O = 100:1) provided compound **13** (21 mg, 40%) as a colourless oil, along with compound **14** (4 mg, 8%) as a colourless oil and starting material **2** (20 mg, 42%). For compound **13**: R<sub>f</sub> = 0.18 (petroleum/ Et<sub>2</sub>O = 3:1). [α]<sub>D</sub><sup>25</sup> = + 4.5 (c 1.1, CHCl<sub>3</sub>). <sup>1</sup>H NMR (300 MHz, CDCl<sub>3</sub>): δ = 7.08 (brs, 1H), 4.96 (brs, 2H), 3.91 (brs, 1H), 3.36 (d, *J* = 16Hz, 1H), 3.09 (d, *J* = 16Hz, 1H), 2.63 – 2.46 (m, 1H), 2.36 – 2.10 (m, 2H), 2.07 (s, 3H), 1.72 – 1.56 (m, 2H), 1.26 (s, 3H), 1.06 (d, *J* =

7Hz, 3H);  $^{13}\text{C}$  NMR (75 MHz,  $\text{CDCl}_3$ ):  $\delta$  = 213.5, 154.7, 136.4, 128.8, 122.0, 117.7, 69.9, 39.88, 36.6, 33.1, 29.7, 23.1, 19.9, 17.3, 8.3; HRMS: calcd for  $\text{C}_{15}\text{H}_{21}\text{O}_3^+$  [ $\text{M} + \text{H}^+$ ]: 249.1490, found 249.1488. For compounds **14**:  $R_f$  = 0.27 (petroleum/  $\text{Et}_2\text{O}$  = 3:1).  $^1\text{H}$  NMR (300 MHz,  $\text{CDCl}_3$ ):  $\delta$  = 7.06 (brs, 1H), 5.50 (t,  $J$  = 7Hz, 1H), 3.35 (brs, 2H), 2.97 (d,  $J$  = 15Hz, 1H), 2.38 – 2.23 (m, 2H), 2.10 – 2.02 (m, 1H), 1.97 (s, 3H), 1.84 – 1.78 (m, 1H), 1.72 (s, 3H), 1.57 – 1.48 (m, 2H), 1.05 (d,  $J$  = 7Hz, 3H);  $^{13}\text{C}$  NMR (75 MHz,  $\text{CDCl}_3$ )  $\delta$  = 214.5, 214.0, 149.9, 146.6, 138.7, 136.9, 136.6, 132.2, 129.4, 122.9, 122.0, 116.7, 77.2, 40.6, 39.8, 39.6, 38.6, 32.4, 31.9, 29.7, 27.2, 26.5, 25.8, 23.9, 23.5, 17.8, 13.9, 9.3, 7.9.

Derivatization of compound **13** using (*S*)-camphanic acid: Compound **13** (4 mg, 0.016 mmol) was dissolved in THF (0.5 ml) before (*S*)-camphanic acid (3.2 mg, 0.016 mmol) and EDC (3 mg, 0.016) introduced in the reaction mixture at rt. The reaction mixture was left for stirring at the same temperature for 12 h before quenched with saturated  $\text{NaHCO}_3$  (3 ml) and extracted with  $\text{Et}_2\text{O}$  (3 x 5 ml). The combined organic extracts were dried with anhydrous sodium sulfate, filtered and evaporated *in vacuo*. Estimation of the enantiomeric excess of compound **13** was judged by the crude NMR of the reaction mixture.

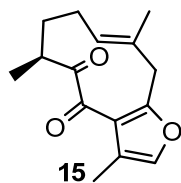

### Compound **15**

To a stirred suspension of PDC (18 mg, 0.048 mmol) and silica gel (10 mg) in dry  $\text{CH}_2\text{Cl}_2$  (1 ml) was added dropwise at room temperature a solution of the alcohol **13** (10 mg, 0.04 mmol) in dry  $\text{CH}_2\text{Cl}_2$  (1 ml). The reaction mixture was vigorously stirred under argon atmosphere for 4h. The resulting dark brown slurry was filtered through a short column of celite, eluted with  $\text{Et}_2\text{O}$  and chromatographed on neutralized silica gel column (petroleum/  $\text{Et}_2\text{O}$  = 100:1) to give **15** (9 mg, 90%) as a colourless oil. The compound is readily transforms to a mixture of zedoarol (**18**) and several other unidentified compounds.  $R_f$  = 0.63 (petroleum/ $\text{Et}_2\text{O}$  = 3:1).  $^1\text{H}$  NMR (300 MHz,  $\text{CDCl}_3$ ):  $\delta$  = 7.10 (brs, 1H), 5.29 – 5.16 (m, 1H), 3.54 [d, (a,b system),  $J$  = 16.5Hz, 1H], 3.31 [d, (a,b system),  $J$  = 16.5Hz, 1H], 3.00 – 2.83(m, 1H), 2.32 – 1.94 (m, 4H), 2.04 (s, 3H), 1.57 (s, 3H), 1.27 (s, 3H).



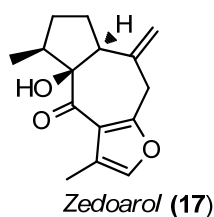

### Zedoarol (17)

To a stirred suspension of PDC (55 mg, 0.15 mmol) and silica gel (30 mg) in dry  $\text{CH}_2\text{Cl}_2$  (1 ml) was added dropwise at room temperature a solution of the alcohols **14** (30 mg, 0.12 mmol) in dry  $\text{CH}_2\text{Cl}_2$  (1 ml). The reaction mixture was vigorously stirred under argon atmosphere for 24h. The resulting dark brown slurry was filtered through a short column of celite, eluted with  $\text{Et}_2\text{O}$  and chromatographed on neutralized silica gel column (petroleum/  $\text{Et}_2\text{O}$  = 50:1) to give zedoarol **17** (23 mg, 77%) as a colourless oil.

#### Alternatively:

A stirred solution of compound **15** (10 mg, 0.04 mmol) in toluene (1 ml) was heated for 4 h at  $140^\circ\text{C}$ . Then, the mixture was concentrated *in vacuo*. Purification by neutrized silica gel flash column chromatography (petroleum/ $\text{Et}_2\text{O}$  = 50: 1) provided zedoarol **17** (8 mg, 80%) as a colourless oil.

$R_f$  = 0.44 (petroleum/ $\text{Et}_2\text{O}$  = 3:1).  $[\alpha]^{25}_D = +10.2$  (c 1.0,  $\text{CHCl}_3$ ) {literature<sup>3</sup>  $[\alpha]^{25}_D = +11.6$  (c 1.0)}.  $^1\text{H NMR}$  (300 MHz,  $\text{CDCl}_3$ ):  $\delta$  = 7.05 (brs, 1H), 5.30 (brs, 1H), 5.14 (brs, 1H), 3.83 [d, (a,b system),  $J = 18\text{Hz}$ , 1H], 3.65 [d, (a,b system),  $J = 18\text{Hz}$ , 1H], 2.97 (t,  $J = 9.5\text{Hz}$ , 1H), 2.58 – 2.48 (m, 1H), 2.13 (brs, 3H), 2.06 (m, 1H), 1.92 (m, 1H), 1.90 (m, 1H), 1.46 (m, 1H), 1.14 (d,  $J = 6.7\text{Hz}$ , 3H);  $^{13}\text{C NMR}$  (75 MHz,  $\text{CDCl}_3$ )  $\delta$  = 196.9, 158.3, 140.6, 138.4, 122.4, 119.7, 115.1, 84.1, 50.9, 40.5, 38.9, 29.9, 27.2, 14.3, 9.5. HRMS: calcd for  $\text{C}_{15}\text{H}_{19}\text{O}_3^+$  [ $\text{M} + \text{H}^+$ ]: 247.1334, found 247.1329.

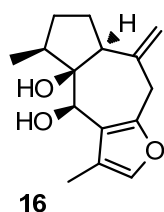

### Compound 16

A stirred solution of **13** (20 mg, 0.08 mmol) in toluene (1.5 ml) was heated for 4 h at  $140^\circ\text{C}$ . Then, the mixture was concentrated *in vacuo*. Purification by neutralized silica gel flash column chromatography (petroleum/ $\text{Et}_2\text{O}$  = 50: 1) provided zedoarol **17** (2 mg, 10%) as a colourless oil, **16** (13 mg, 65%) as a colourless oil.  $R_f$  = 0.30 (petroleum/ $\text{Et}_2\text{O}$  = 3:1).  $[\alpha]^{25}_D = +3.1$  (c 0.8,  $\text{CHCl}_3$ ).  $^1\text{H NMR}$  (300 MHz,  $\text{CDCl}_3$ ):  $\delta$  = 7.03 (brs, 1H), 5.21 (brs, 1H), 5.03 (brs, 1H),

4.52 (d,  $J = 8.6\text{Hz}$ , 1H), 3.76 [d, (a,b system),  $J = 17.7\text{Hz}$ , 1H], 3.52 [d, (a,b system),  $J = 17.7\text{Hz}$ , 1H], 2.67 (t,  $J = 8.7\text{Hz}$ , 1H), 3.42 (d,  $J = 8.8\text{Hz}$ , 1H), 2.26 (q,  $J = 7.3\text{Hz}$ , 1H), 2.07 (brs, 3H), 1.95 – 1.85 (m, 1H), 1.86 – 1.76 (m, 1H), 1.15 (d,  $J = 6.9\text{Hz}$ , 3H);  $^{13}\text{C}$  NMR (75 MHz,  $\text{CDCl}_3$ )=  $\delta$  147.3, 143.2, 137.4, 122.6, 119.5, 113.1, 80.4, 74.2, 51.4, 45.9, 37.4, 31.7, 27.9, 15.5, 9.5. HRMS: calcd for  $\text{C}_{15}\text{H}_{21}\text{O}_3^+$  [ $\text{M} + \text{H}^+$ ]: 249.1490, found 249.1482.

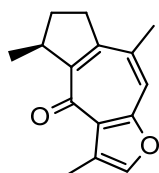

**19**

### Compound 19

A solution of zedoarol (**17**) (30 mg, 0.12 mmol) in MeOH (2.5 ml) was treated with KOH (130 mg, 2.4 mmol) at rt. The reaction was stirred at the same temperature for 30 min before quenched with saturated aqueous  $\text{NH}_4\text{Cl}$  solution and extracted with  $\text{Et}_2\text{O}$  (3 x 7 ml). The combined organic extracts were dried with anhydrous sodium sulfate, filtered and evaporated *in vacuo*. The crude mixture was purified by neutralized silica gel flash column chromatography to provide compound **19** (27 mg, 99%) as a colourless oil.  $^1\text{H}$  NMR (500 MHz,  $\text{CDCl}_3$ ):  $\delta = 7.34$  (s, 1H), 7.24 (s, 1H), 3.66 (m, 1H), 3.15 (m, 1H), 2.98 (m, 1H), 2.45 (s, 3H), 2.32 (s, 3H), 1.52 (m, 1H), 1.53 (m, 1H), 1.23 (d,  $J = 5$  Hz, 3H);  $^{13}\text{C}$  NMR (125 MHz,  $\text{CDCl}_3$ )= 179.5, 157.2, 155.3, 147.5, 141.6, 135.4, 125.5, 123.1, 122.6, 42.6, 36.8, 29.5, 24.8, 18.4, 10.6. HRMS: calcd for  $\text{C}_{15}\text{H}_{17}\text{O}_2^+$  [ $\text{M} + \text{H}^+$ ]: 249.1225, found 249.1228.

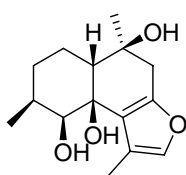

### Compound 20

A solution of compound **13** (10 mg, 0.04 mmol) in DCM (1 ml) was treated with p-toluenesulfonic acid monohydrate (8 mg, 0.04 mmol) at 0 °C. The reaction was stirred at the same temperature for 1.5 h before quenched with  $\text{NaHCO}_3$  and extracted with ether (3 x 10 ml). The combined organic extracts were dried with anhydrous sodium sulfate, filtered and evaporated *in vacuo*. The crude mixture was purified by neutralized silica gel flash column chromatography to provide compound **20** (8 mg, 75%) as a colourless oil.  $[\alpha]_D^{25} = -4.6$  (c 0.2,  $\text{CHCl}_3$ )  $^1\text{H}$  NMR (500 MHz,  $\text{CDCl}_3$ )  $\delta = 7.11$  (s, 1H), 4.50 (d,  $J = 12$  Hz, 1H), 3.17 (s, 1H), 3.08 (d,

$J = 15$  Hz, 1H), 2.75 (d,  $J = 15$  Hz, 1H), 2.58 (d,  $J = 9$  Hz, 1H), 2.08 (s, 3H), 1.89-1.80 (m, 4H), 1.62 (m, 1H), 1.33 (s, 1H), 1.15 (d,  $J = 6$  Hz, 3H);  $^{13}\text{C}$  NMR (125 MHz,  $\text{CDCl}_3$ ) = 148.4, 137.7, 120.9, 120.8, 91.2, 80.8, 71.4, 46.6, 43.0, 41.6, 35.7, 24.9, 21.8, 12.7, 8.2. HRMS: calcd for  $\text{C}_{15}\text{H}_{23}\text{O}_4^+$  [ $\text{M} + \text{H}^+$ ]: 267.1596, found 267.1601.

### NMR Comparison of synthetic and natural Zedoarol<sup>3</sup>

| Position | $^1\text{H}$ -NMR Shifts ( $\text{CDCl}_3$ )            |                                                             | $^{13}\text{C}$ -NMR Shifts ( $\text{CDCl}_3$ ) |                   |
|----------|---------------------------------------------------------|-------------------------------------------------------------|-------------------------------------------------|-------------------|
|          | Synthetic (500 MHz)                                     | Natural (400 MHz)                                           | Synthetic (125 MHz)                             | Natural (100 MHz) |
| 1        | 2.97 (t, $J = 9.5$ Hz, 1H)                              | 2.98 (t, $J = 9.3$ Hz, 1H)                                  | 50.9                                            | 50.8              |
| 2        | 2.06 (m, 1H);<br>1.90 (m, 1H)                           | 2.05 (m, 1H);<br>1.90 (m, 1H)                               | 27.2                                            | 27.2              |
| 3        | 1.46 (m, 1H); 1.92 (m, 1H)                              | 1.46 (m, 1H); 1.90 (m, 1H)                                  | 29.9                                            | 29.8              |
| 4        | 2.58 – 2.48 (m, 1H)                                     | 2.53 (tq, $J = 6.8, 9.2$ Hz, 1H)                            | 40.5                                            | 40.5              |
| 5        | -                                                       | -                                                           | 84.1                                            | 84.1              |
| 6        | -                                                       | -                                                           | 196.9                                           | 197.0             |
| 7        | -                                                       | -                                                           | 119.7                                           | 119.8             |
| 8        | -                                                       | -                                                           | 158.3                                           | 158.3             |
| 9        | -                                                       | -                                                           | 38.9                                            | 39.0              |
| 10       | -                                                       | -                                                           | 140.6                                           | 140.8             |
| 11       | 3.83 (d, $J = 18$ Hz, 1H);<br>3.65 (d, $J = 18$ Hz, 1H) | 3.83 (d, $J = 18.1$ Hz, 1H);<br>3.66 (d, $J = 18.1$ Hz, 1H) | 122.4                                           | 122.4             |
| 12       | 7.05 (brs, 1H)                                          | 7.05 (brs, 1H)                                              | 138.4                                           | 138.4             |
| 13       | 2.13 (brs, 3H)                                          | 2.12 (d, $J = 1.4$ Hz, 3H)                                  | 9.5                                             | 9.5               |
| 14       | 1.14 (d, $J = 6.7$ Hz, 3H)                              | 1.14 (d, $J = 6.8$ Hz, 3H)                                  | 14.3                                            | 14.4              |
| 15       | 5.30 (brs, 1H); 5.14 (brs, 1H)                          | 5.32 (brs, 1H); 5.16 (brs, 1H)                              | 115.1                                           | 115.2             |

## NMR Comparison of synthetic and natural Gweicurculactone<sup>2</sup>

| Position | <sup>1</sup> H-NMR Shifts (CDCl <sub>3</sub> ) |                              | <sup>13</sup> C-NMR Shifts (CDCl <sub>3</sub> ) |                   |
|----------|------------------------------------------------|------------------------------|-------------------------------------------------|-------------------|
|          | Synthetic (500 MHz)                            | Natural (400 MHz)            | Synthetic (125 MHz)                             | Natural (100 MHz) |
| 1        |                                                |                              | 146.3                                           | 146.3             |
| 2        | 2.71 – 2.61 (m, 1H)<br>2.84 – 2.74 (m, 1H)     | 2.66 (m, 1H)<br>2.83 (m, 1H) | 32.1                                            | 32.0              |
| 3        | 1.51 (m, 1H)<br>2.14 – 2.05 (m, 1H)            | 1.51 (m, 1H)<br>2.10 (m, 1H) | 33.8                                            | 33.8              |
| 4        | 3.10 – 3.00 (m, 1H)                            | 3.07 (m, 1H)                 | 44.0                                            | 43.9              |
| 5        |                                                |                              | 156.7                                           | 156.7             |
| 6        | 6.86 (s, 1H)                                   | 6.86 (s, 1H)                 | 118.0                                           | 118.0             |
| 7        |                                                |                              | 154.9                                           | 154.8             |
| 8        |                                                |                              | 144.3                                           | 144.4             |
| 9        | 6.70 (s, 1H)                                   | 6.70 (s, 1H)                 | 116.4                                           | 116.5             |
| 10       |                                                |                              | 103.7                                           | 103.6             |
| 11       |                                                |                              | 136.6                                           | 136.6             |
| 12       |                                                |                              | 170.7                                           | 170.8             |
| 13       | 2.21 (s, 3H)                                   | 2.21 (s, 3H)                 | 7.8                                             | 7.8               |
| 14       | 1.28 (d, <i>J</i> = 4.8 Hz, 3H)                | 1.27 (d, 4.5 Hz, 3H)         | 24.8                                            | 24.8              |
| 15       | 1.95 (s, 3H)                                   | 1.95 (s, 3H)                 | 20.2                                            | 20.2              |

## References

<sup>1</sup> Elissavet E. Anagnostaki and Alexandros L. Zografos, *Org. lett.*, **2013**, *15*, 152-155.

<sup>2</sup> S. D. Asem and W. S. Laitonjam, *Nat. Prod. Res.*, 2014, **28**, 477-482.

<sup>3</sup> Y. Shiobara, S. Asakawa, M. Kodama and T. Takemoto, *Phytochemistry*, 1986, **25**, 1351-1353.

## NMR Spectra of compounds

PROTON\_01  
EA1201

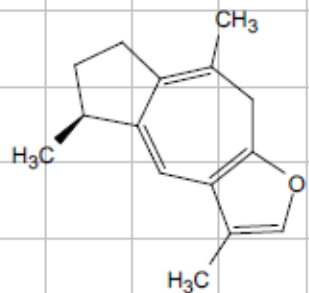

Compound 3, 500 MHz, CDCl<sub>3</sub>

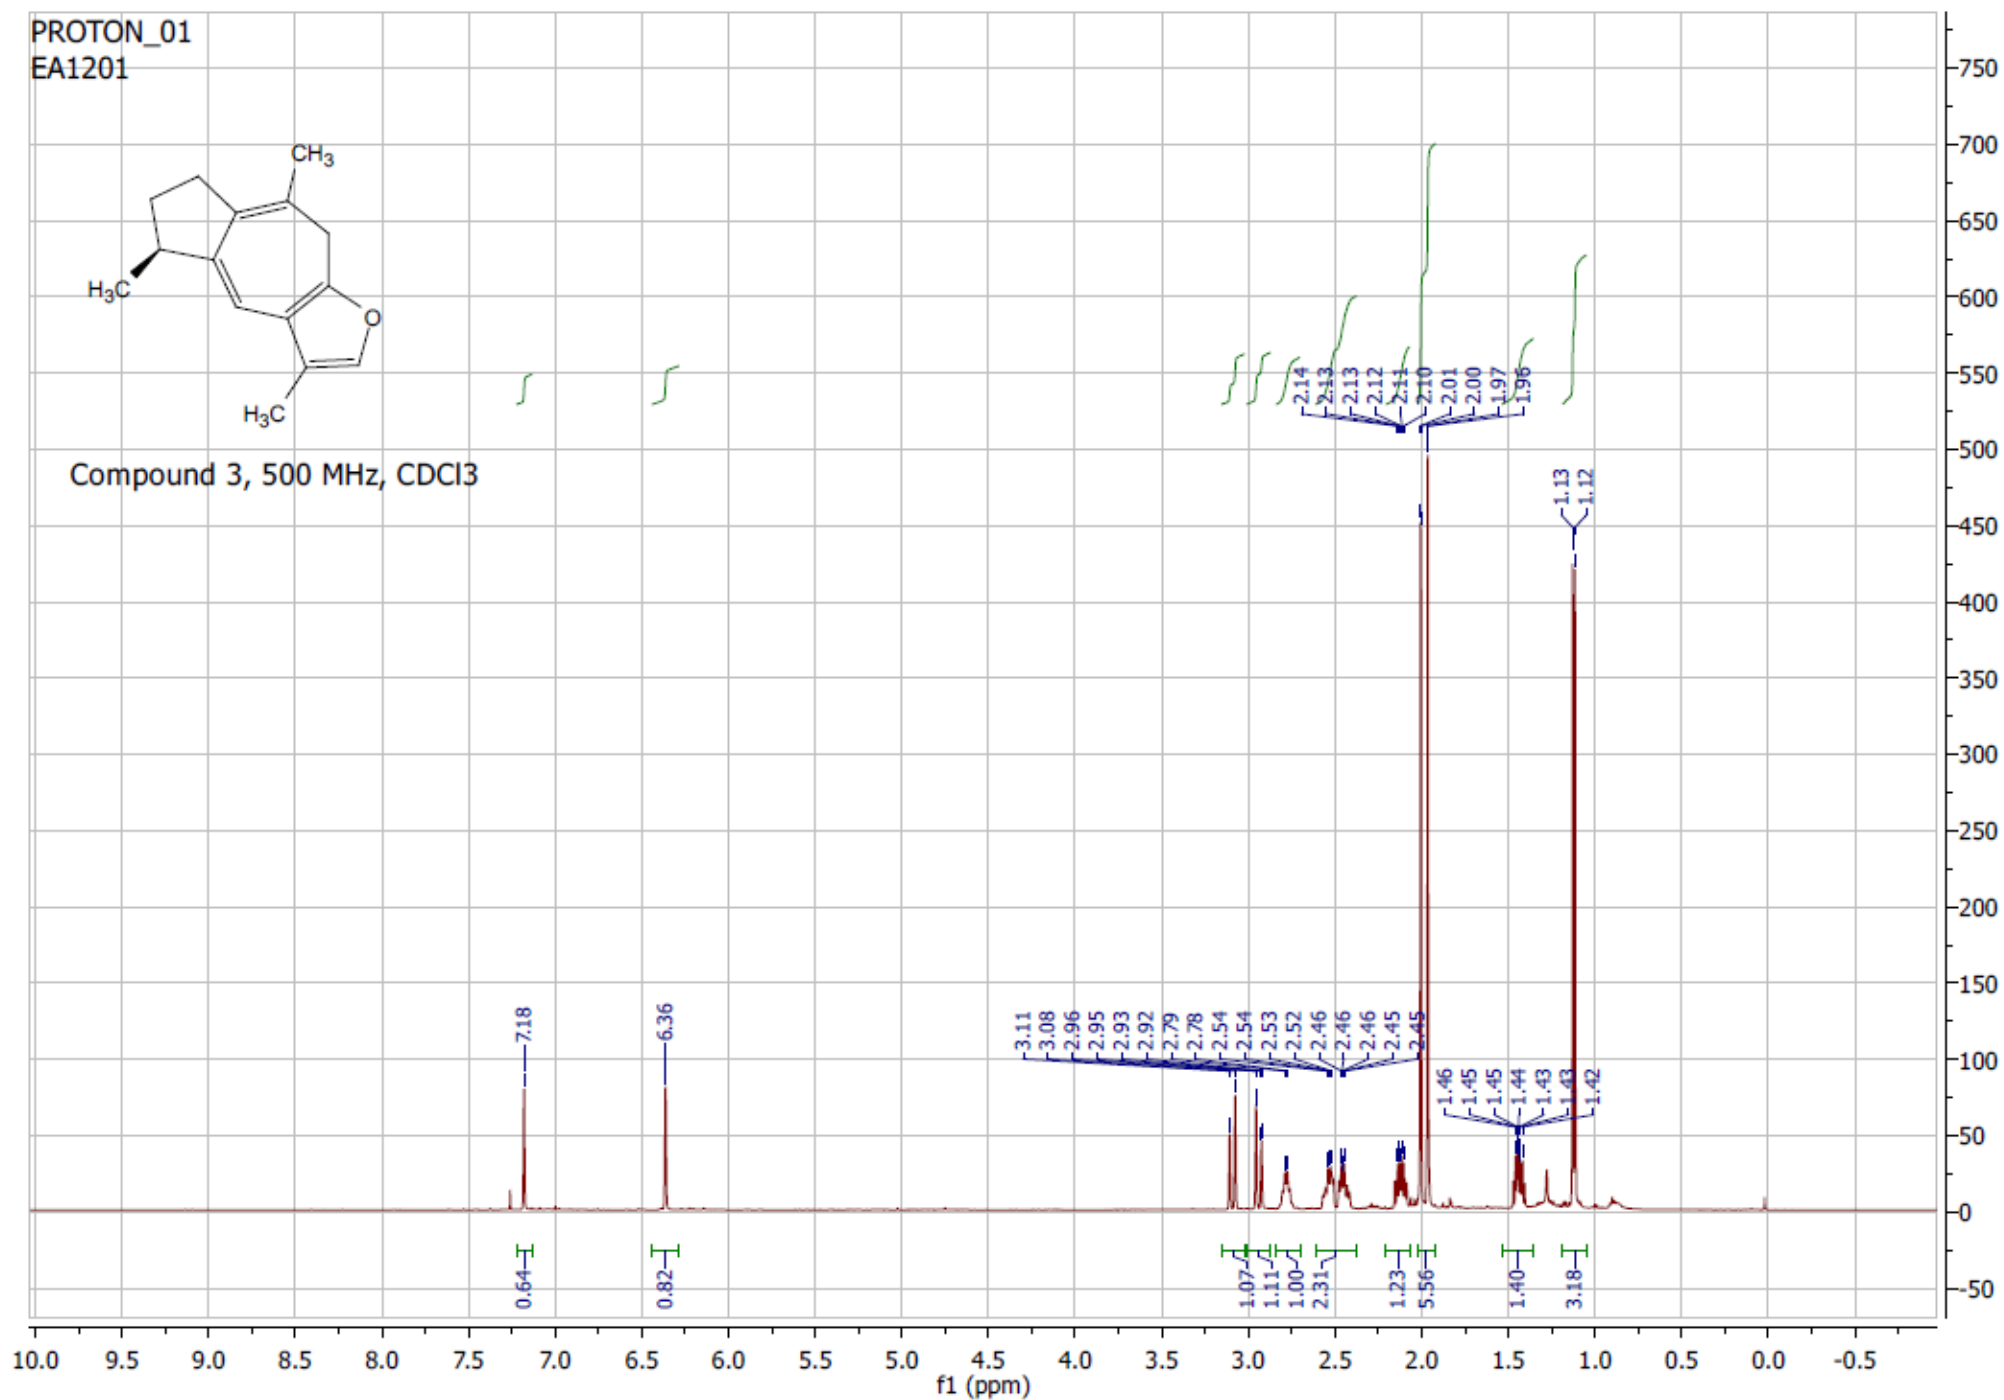

CARBON\_01  
EA1201

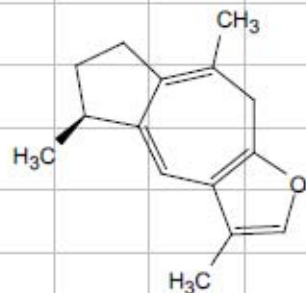

Compound 3, 125 MHz, CDCl<sub>3</sub>

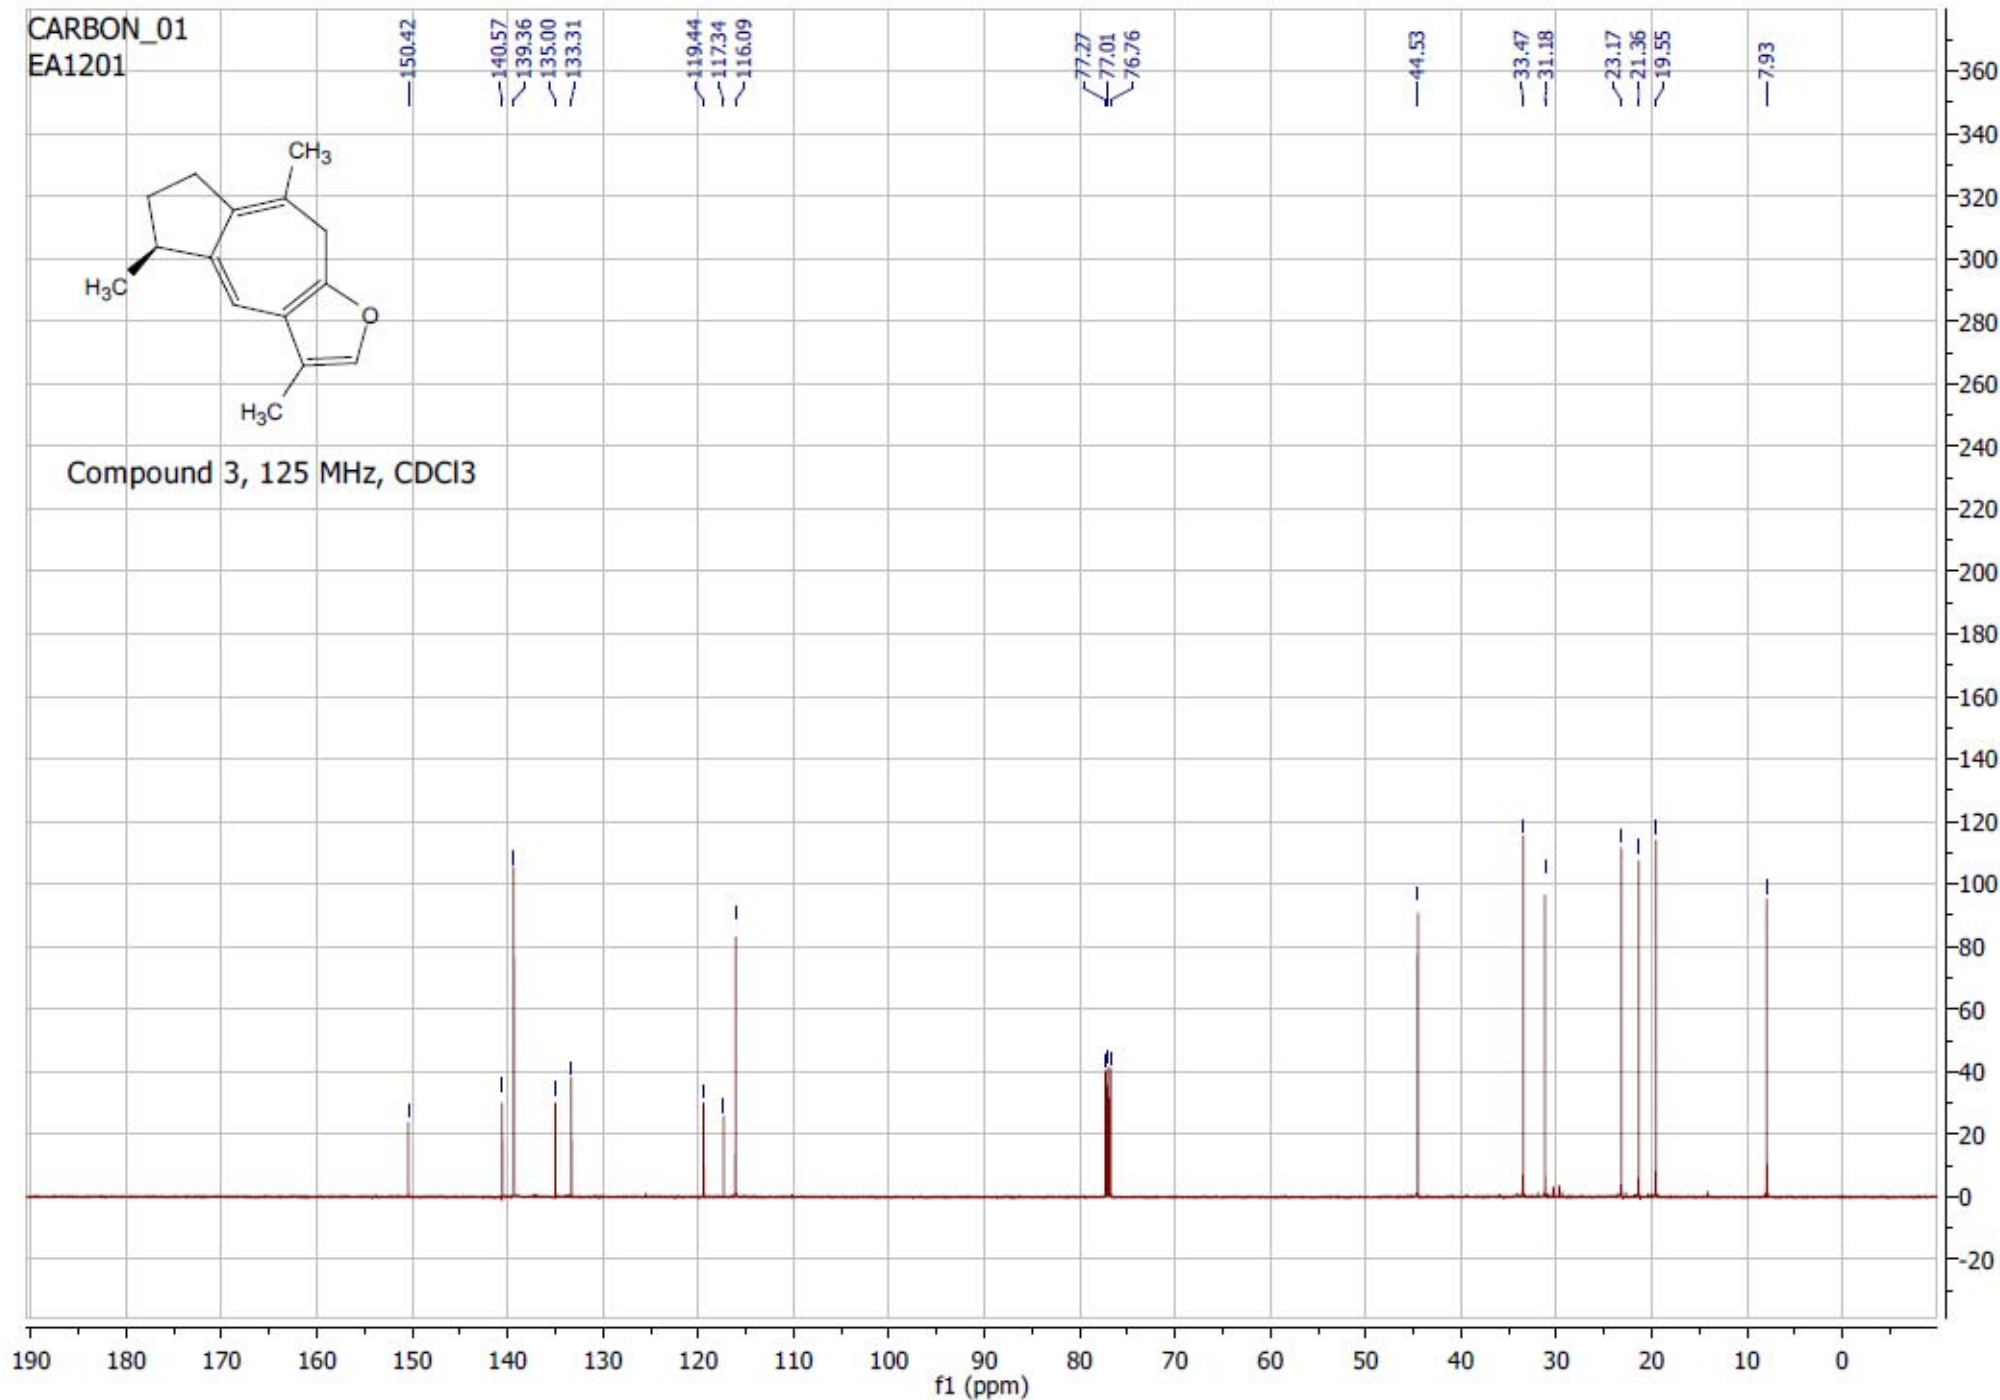

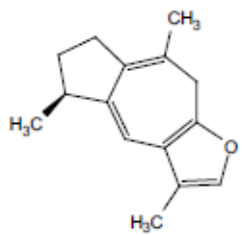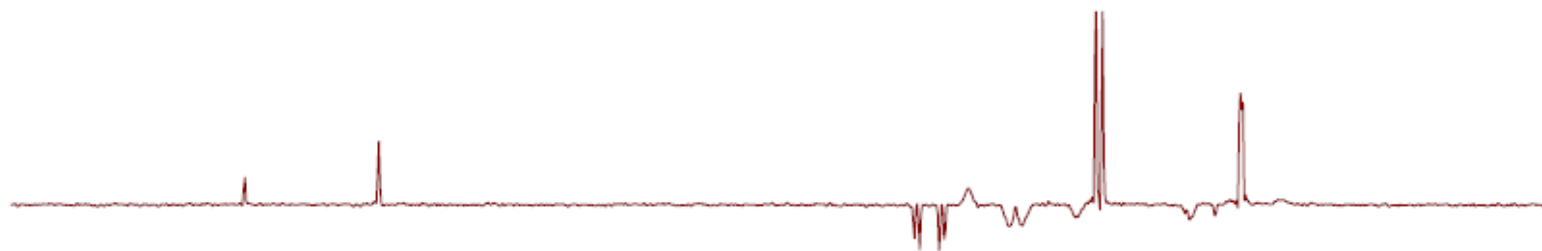

Compound 3, 500 MHz, CDCl<sub>3</sub>

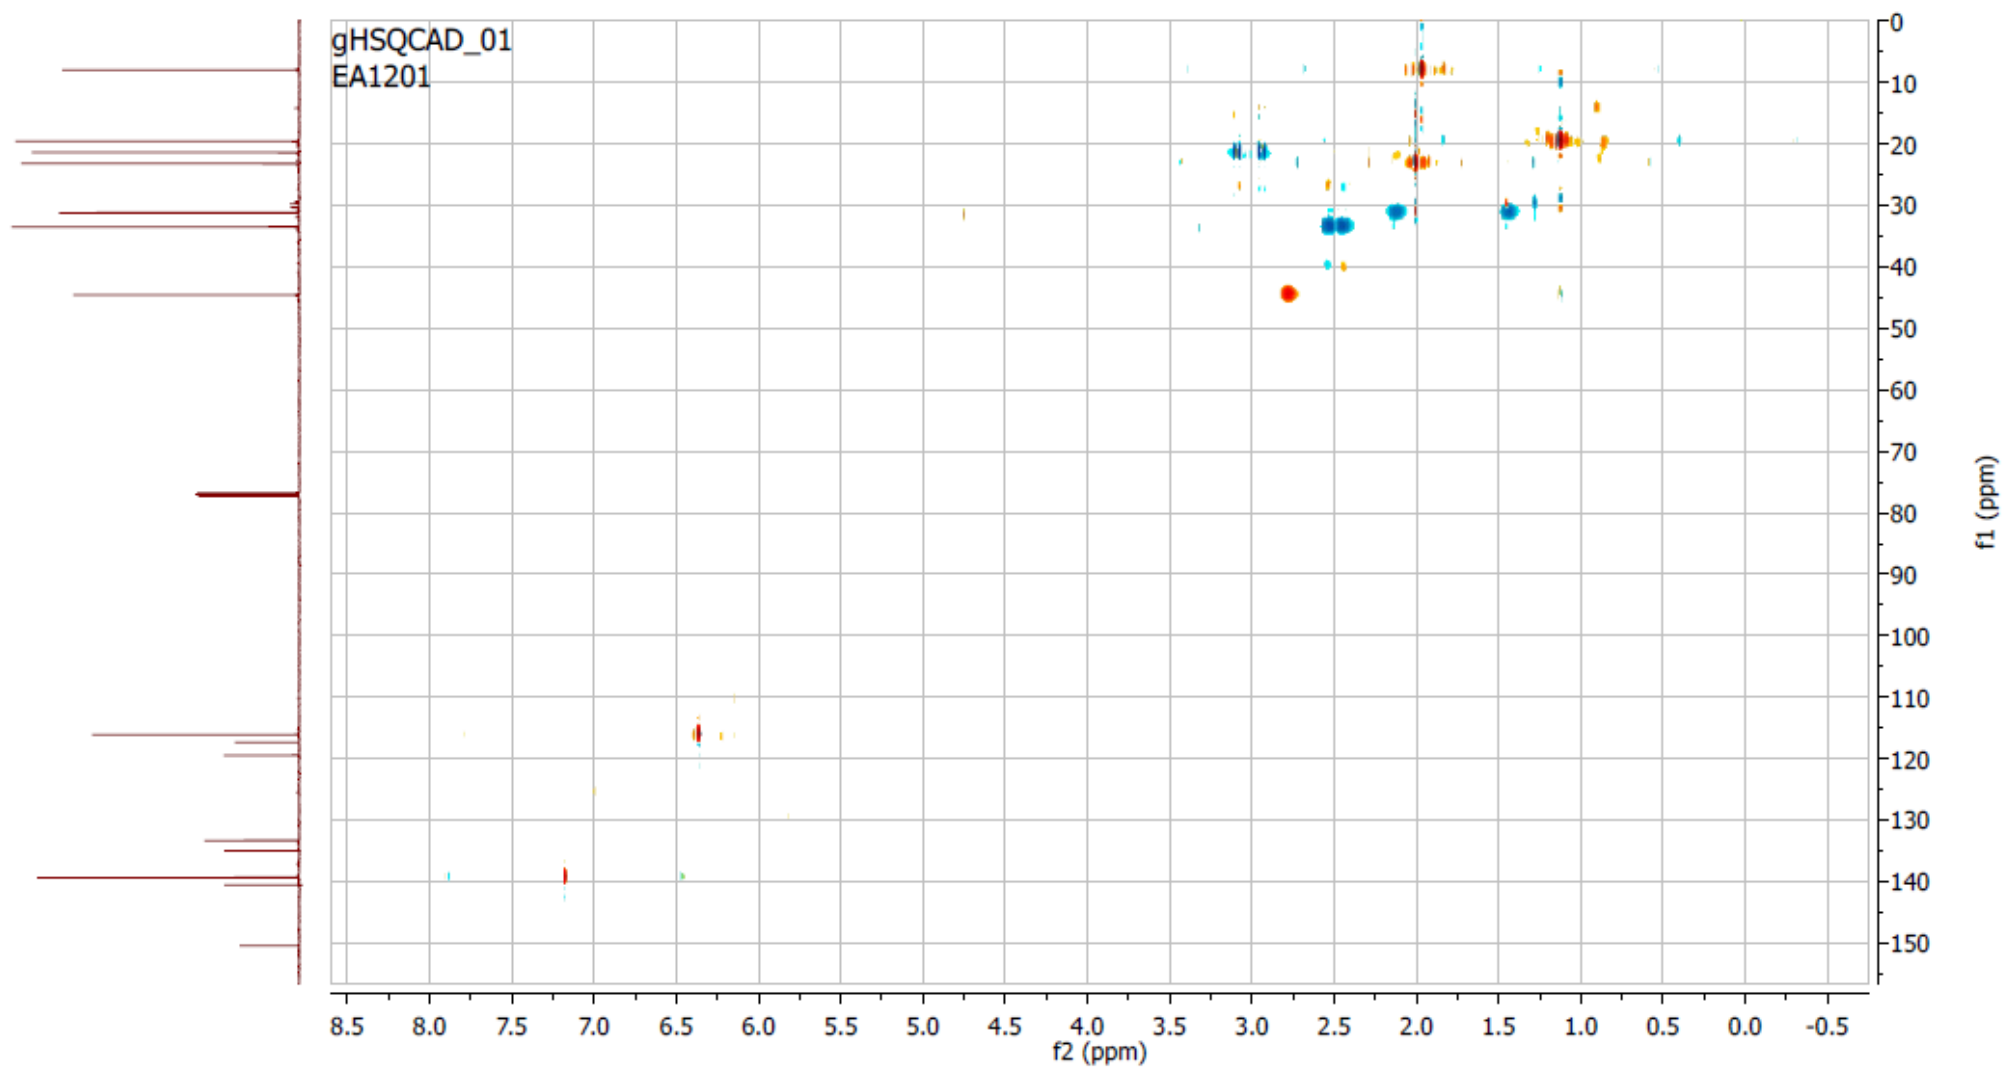



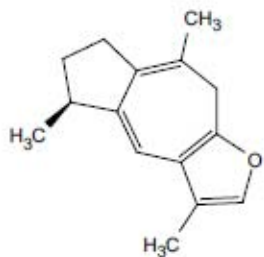

Compound 3, 500 MHz, CDCl<sub>3</sub>

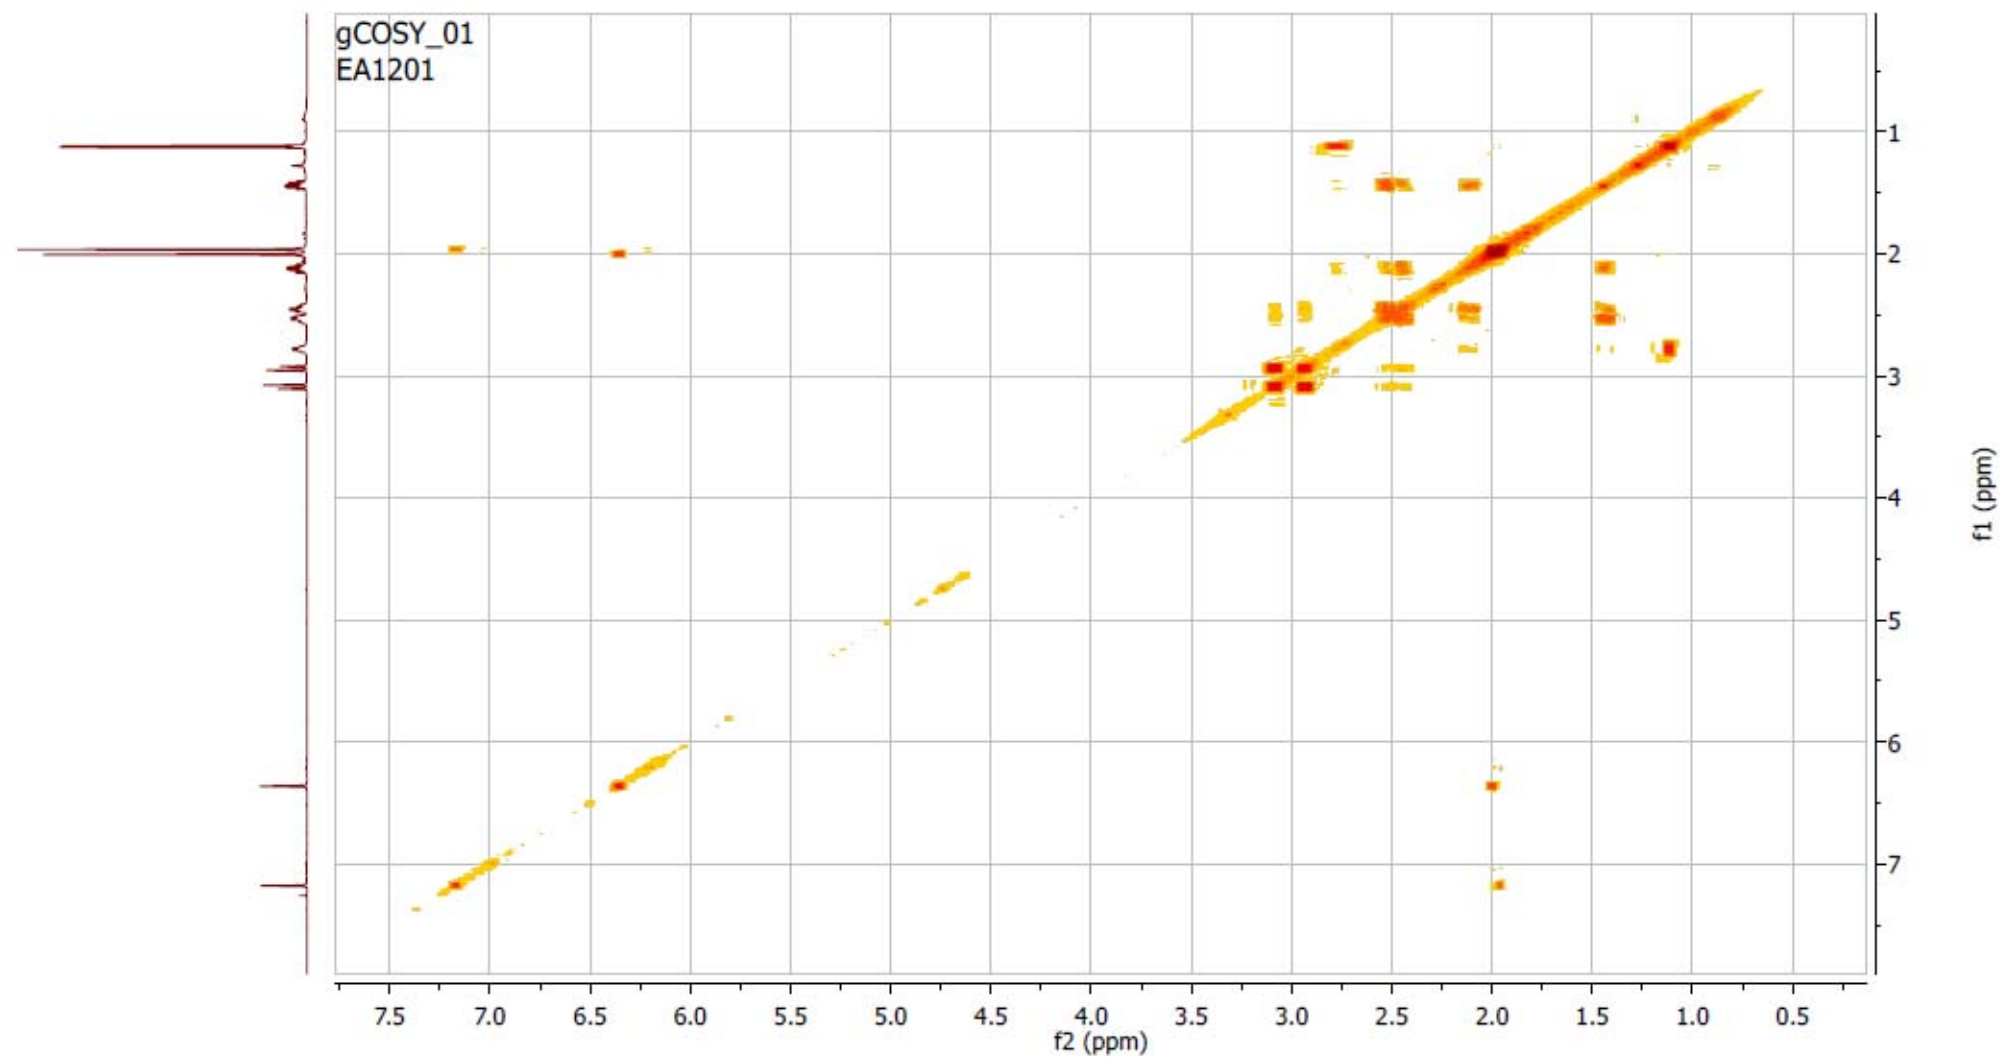

PROTON\_01  
EA1050\_5\_7-diene\_stili\_2nd\_spot

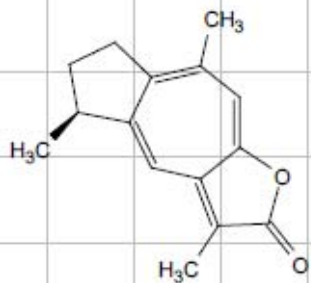

gweicurculactone (4). 500MHz, CDCl3

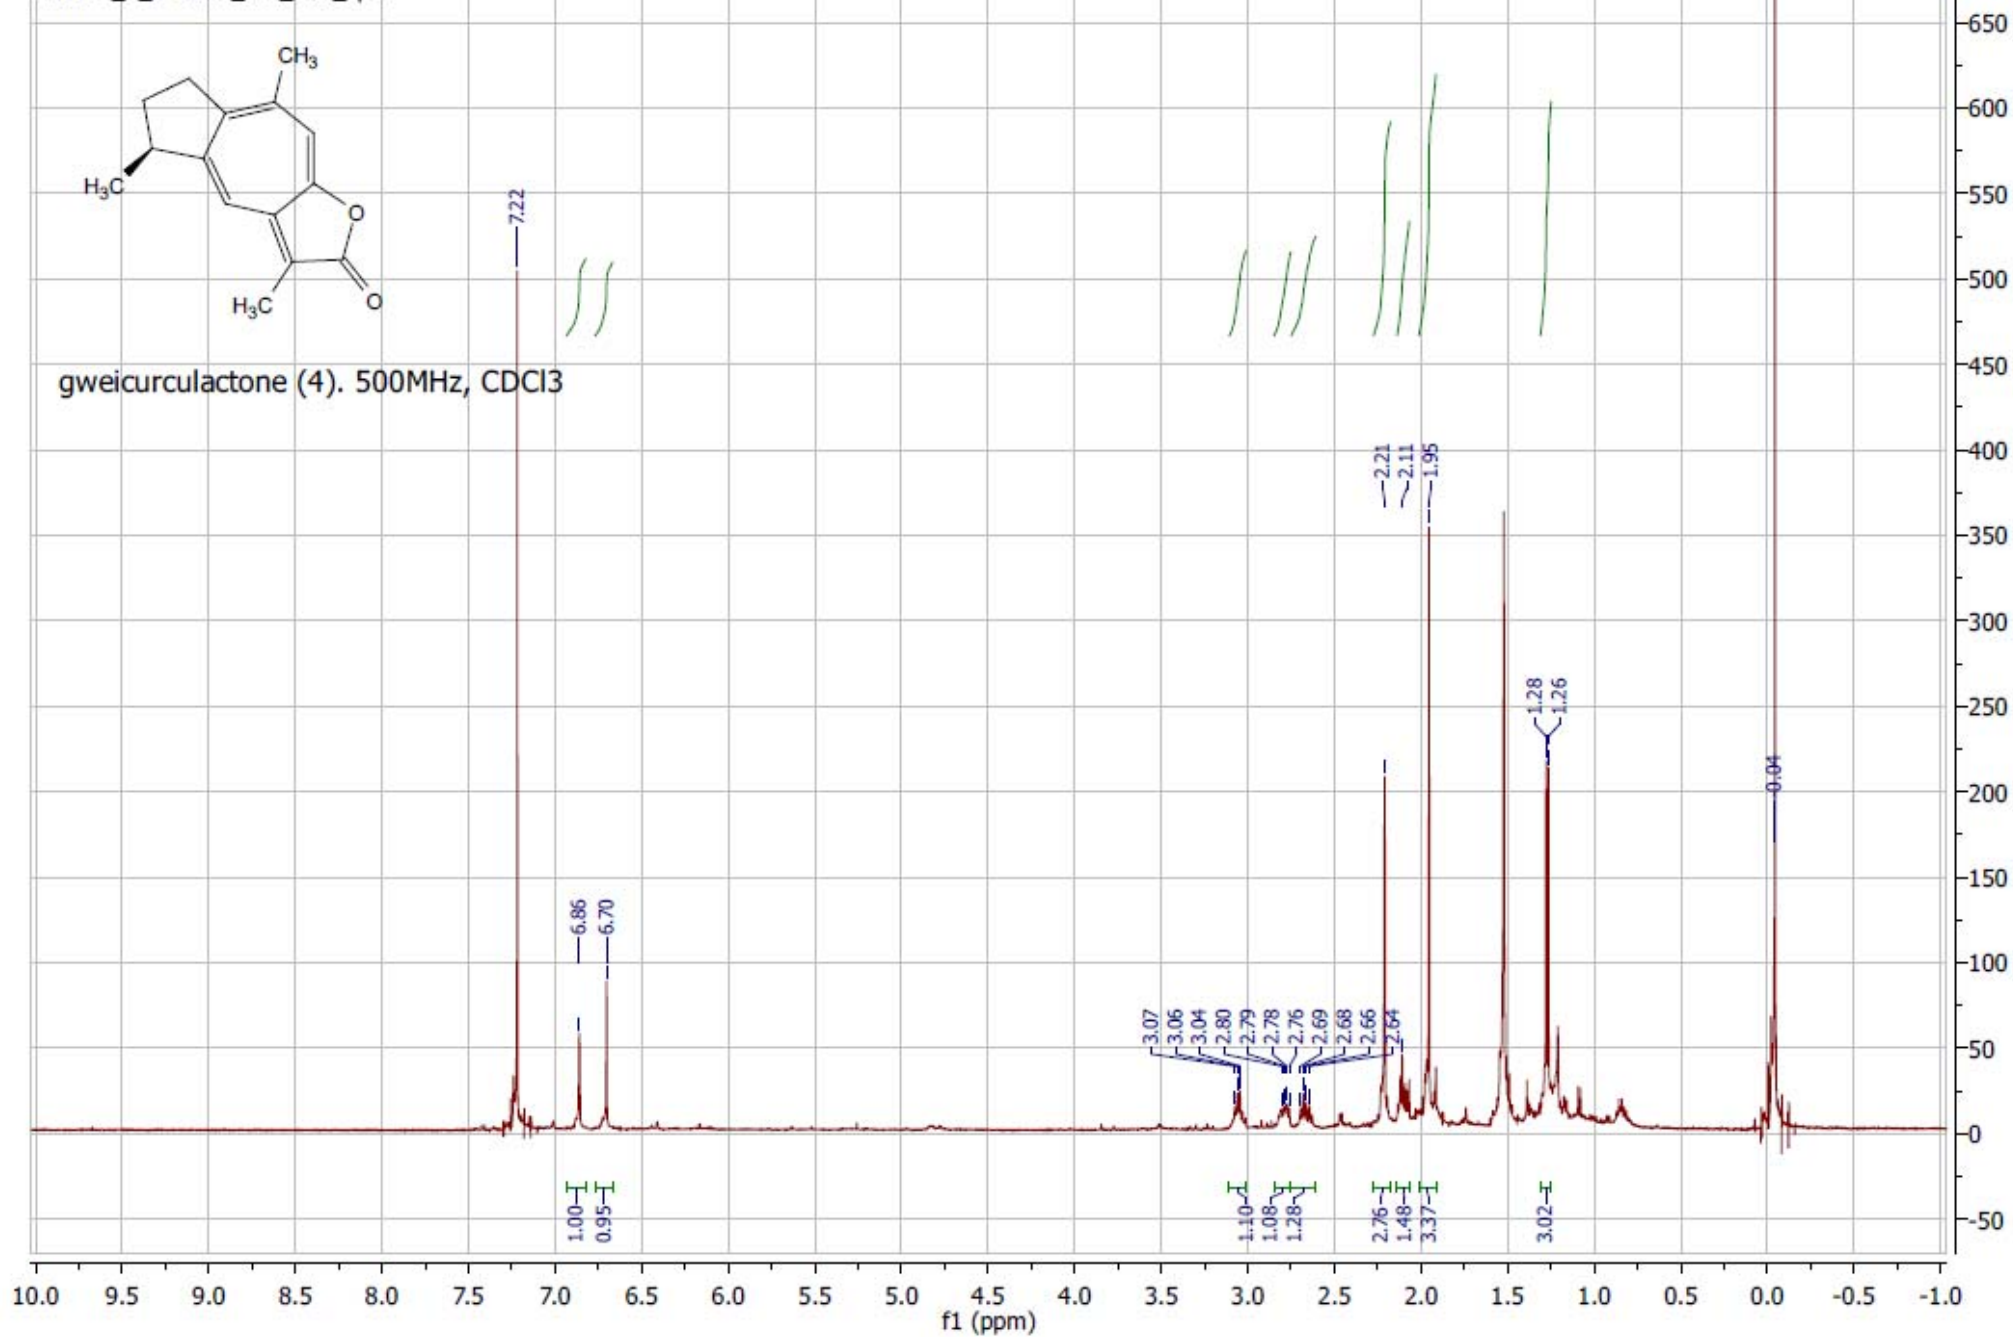

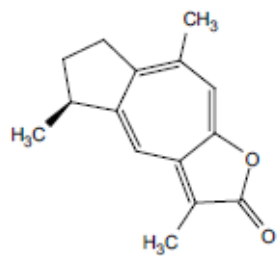

gweicurculactone

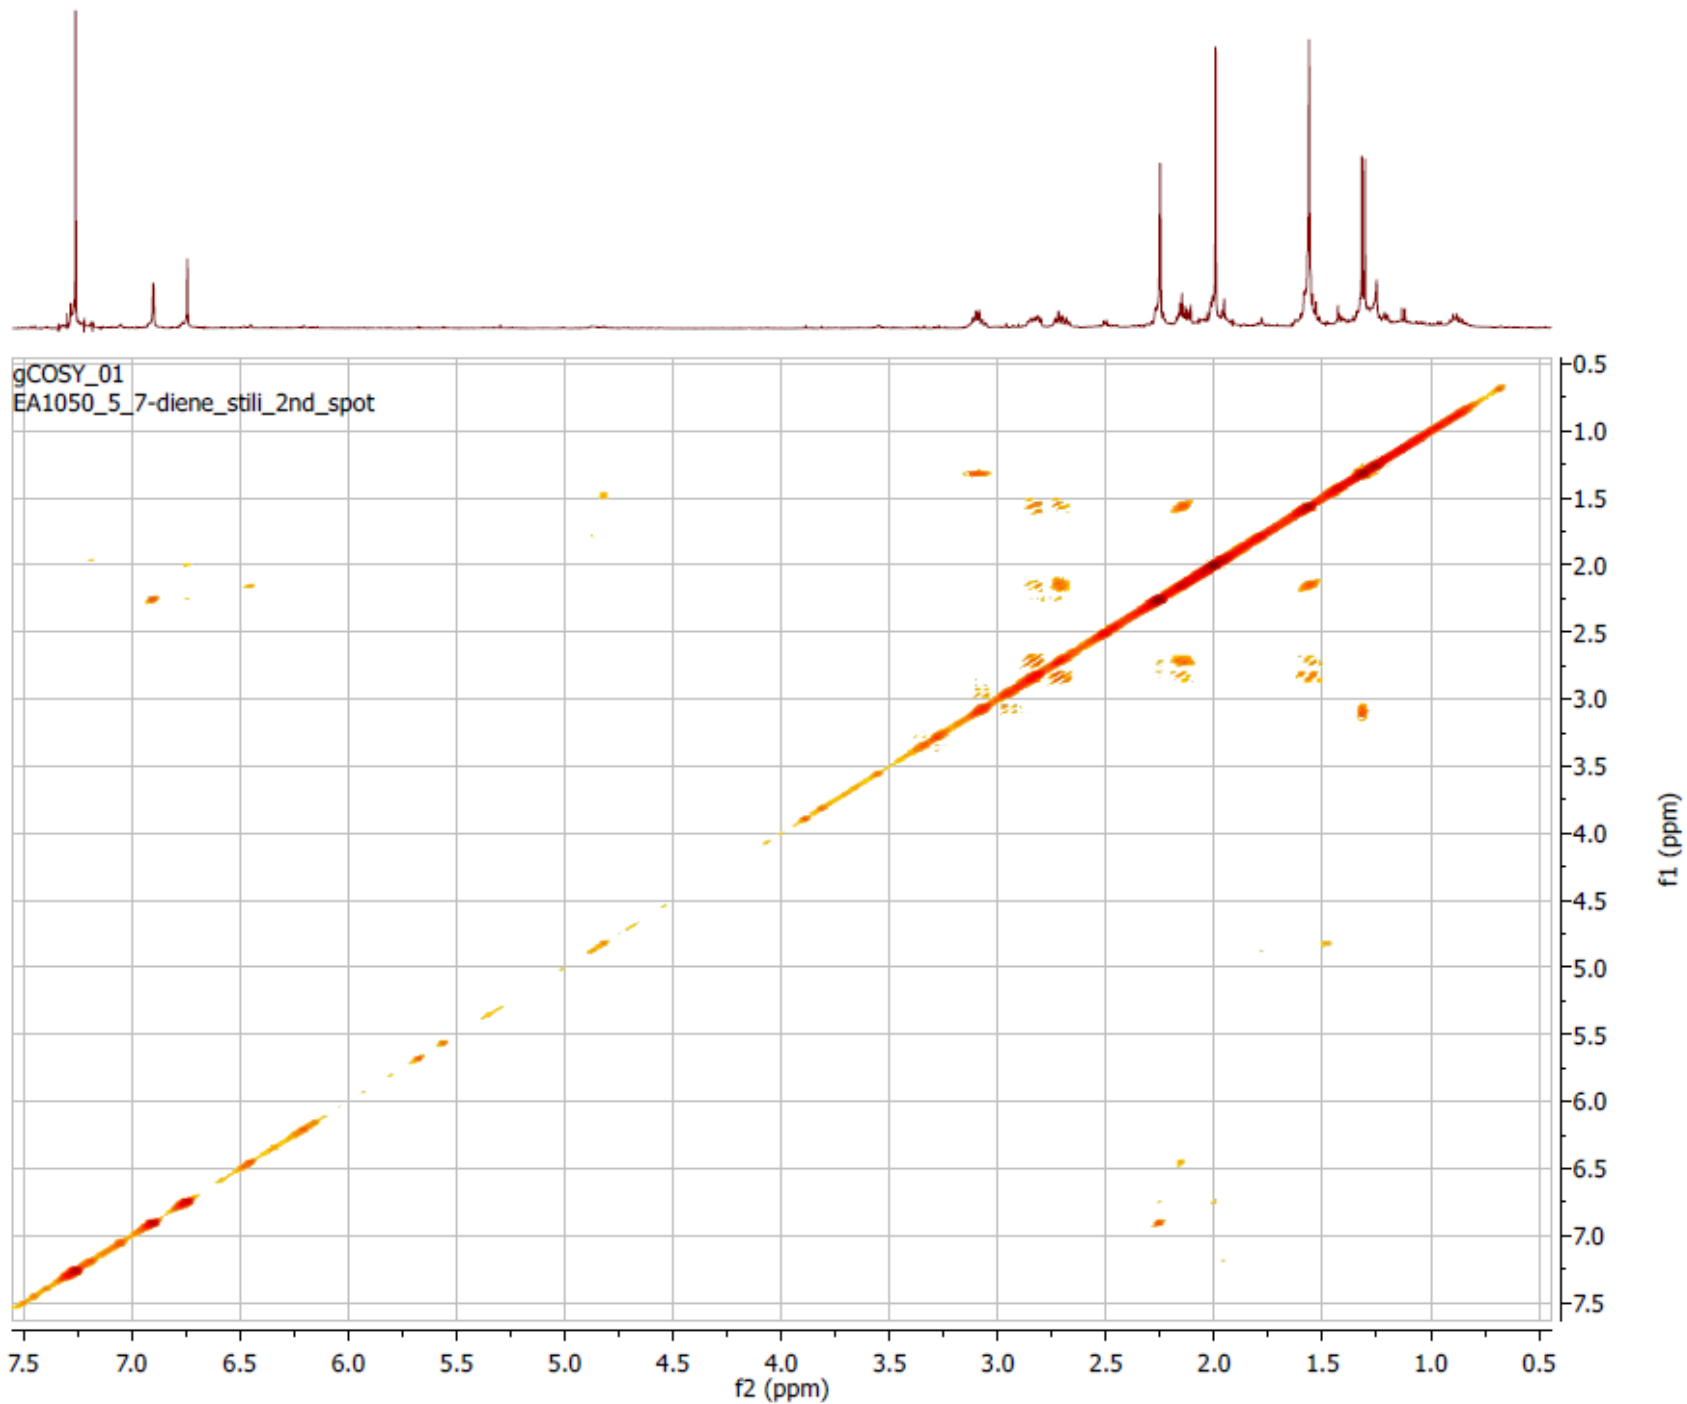

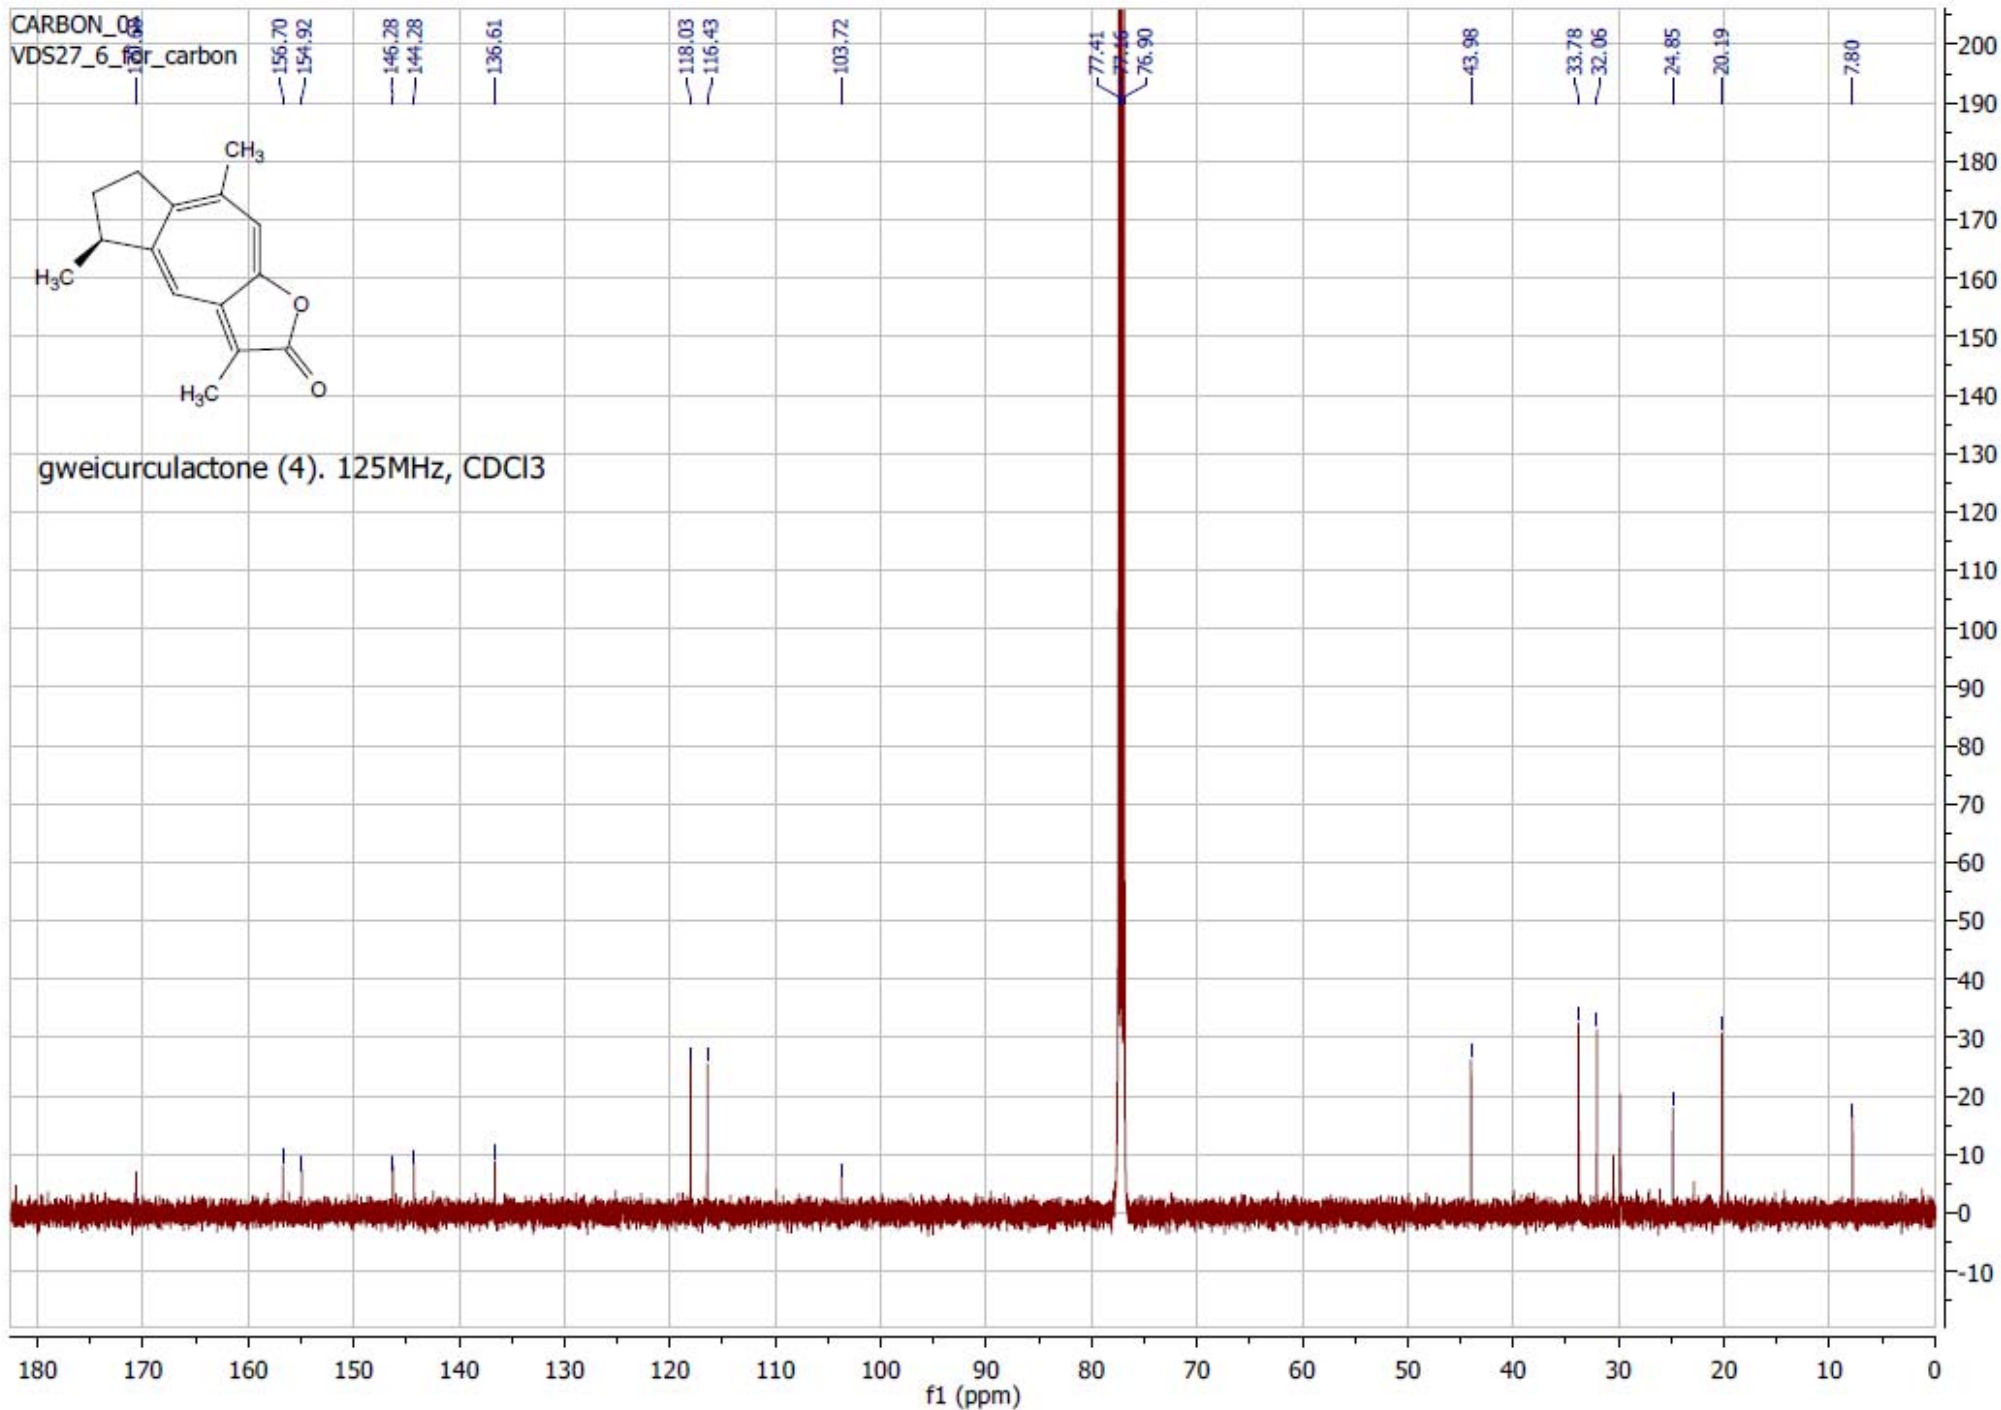

PROTON\_01  
EA1090\_3

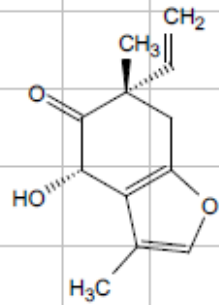

Compound 10, 500 MHz, CDCl<sub>3</sub>

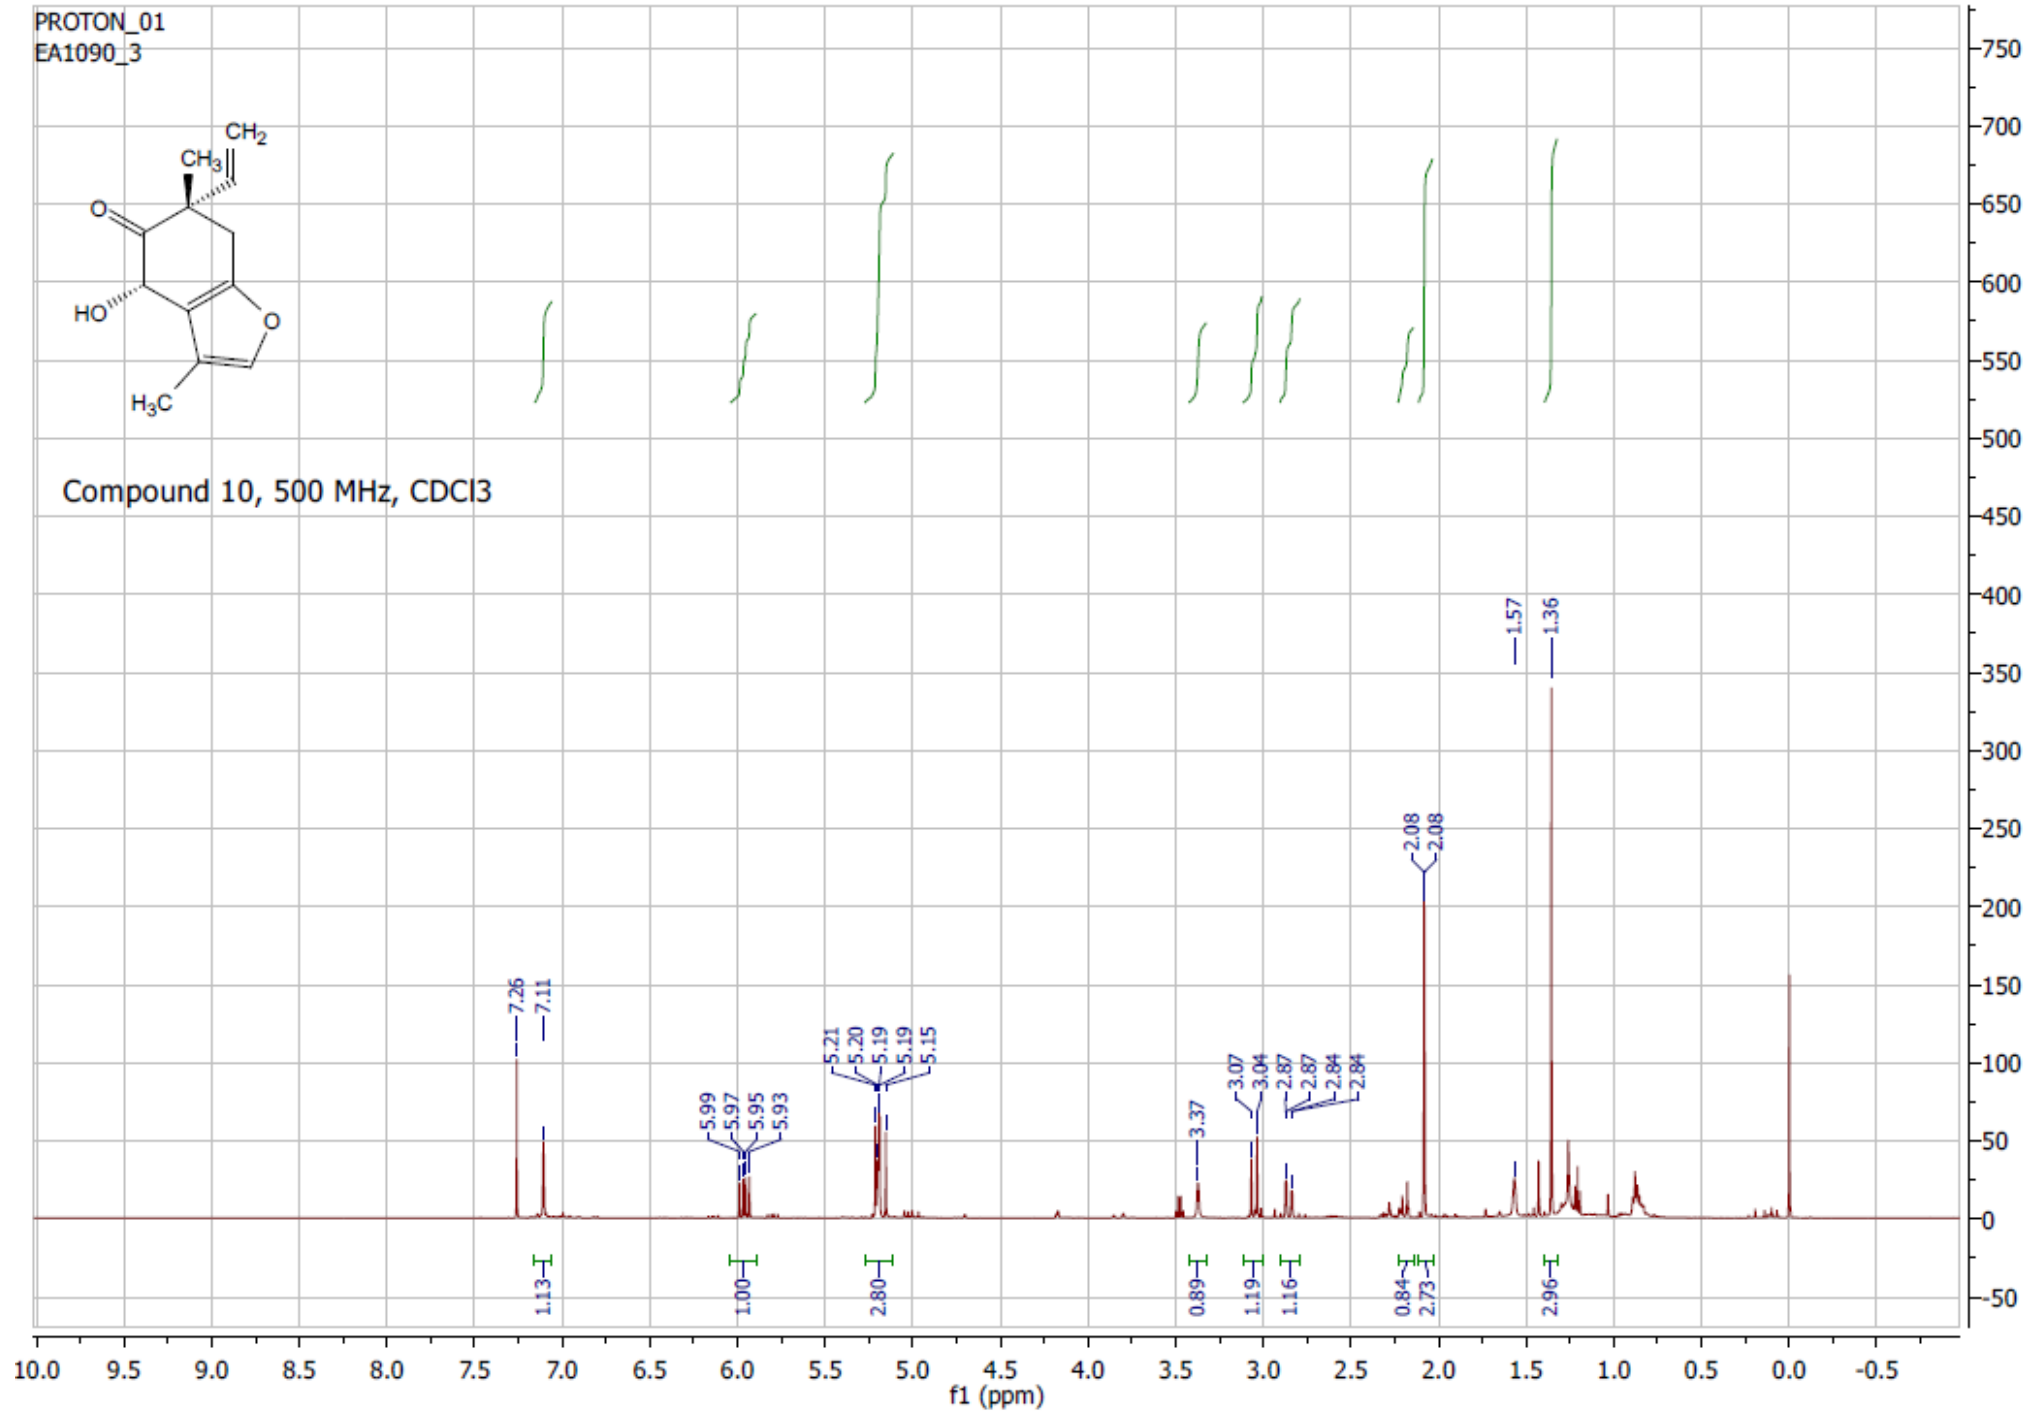

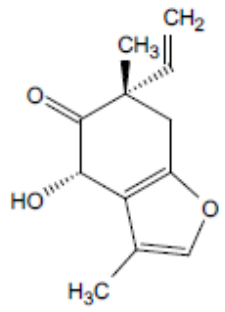

Compound 10, 500 MHz, CDCl<sub>3</sub>

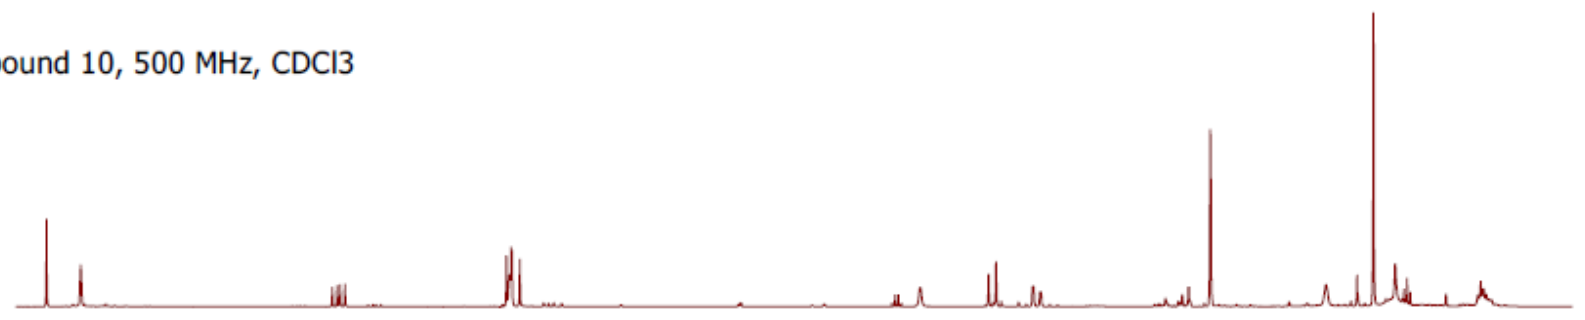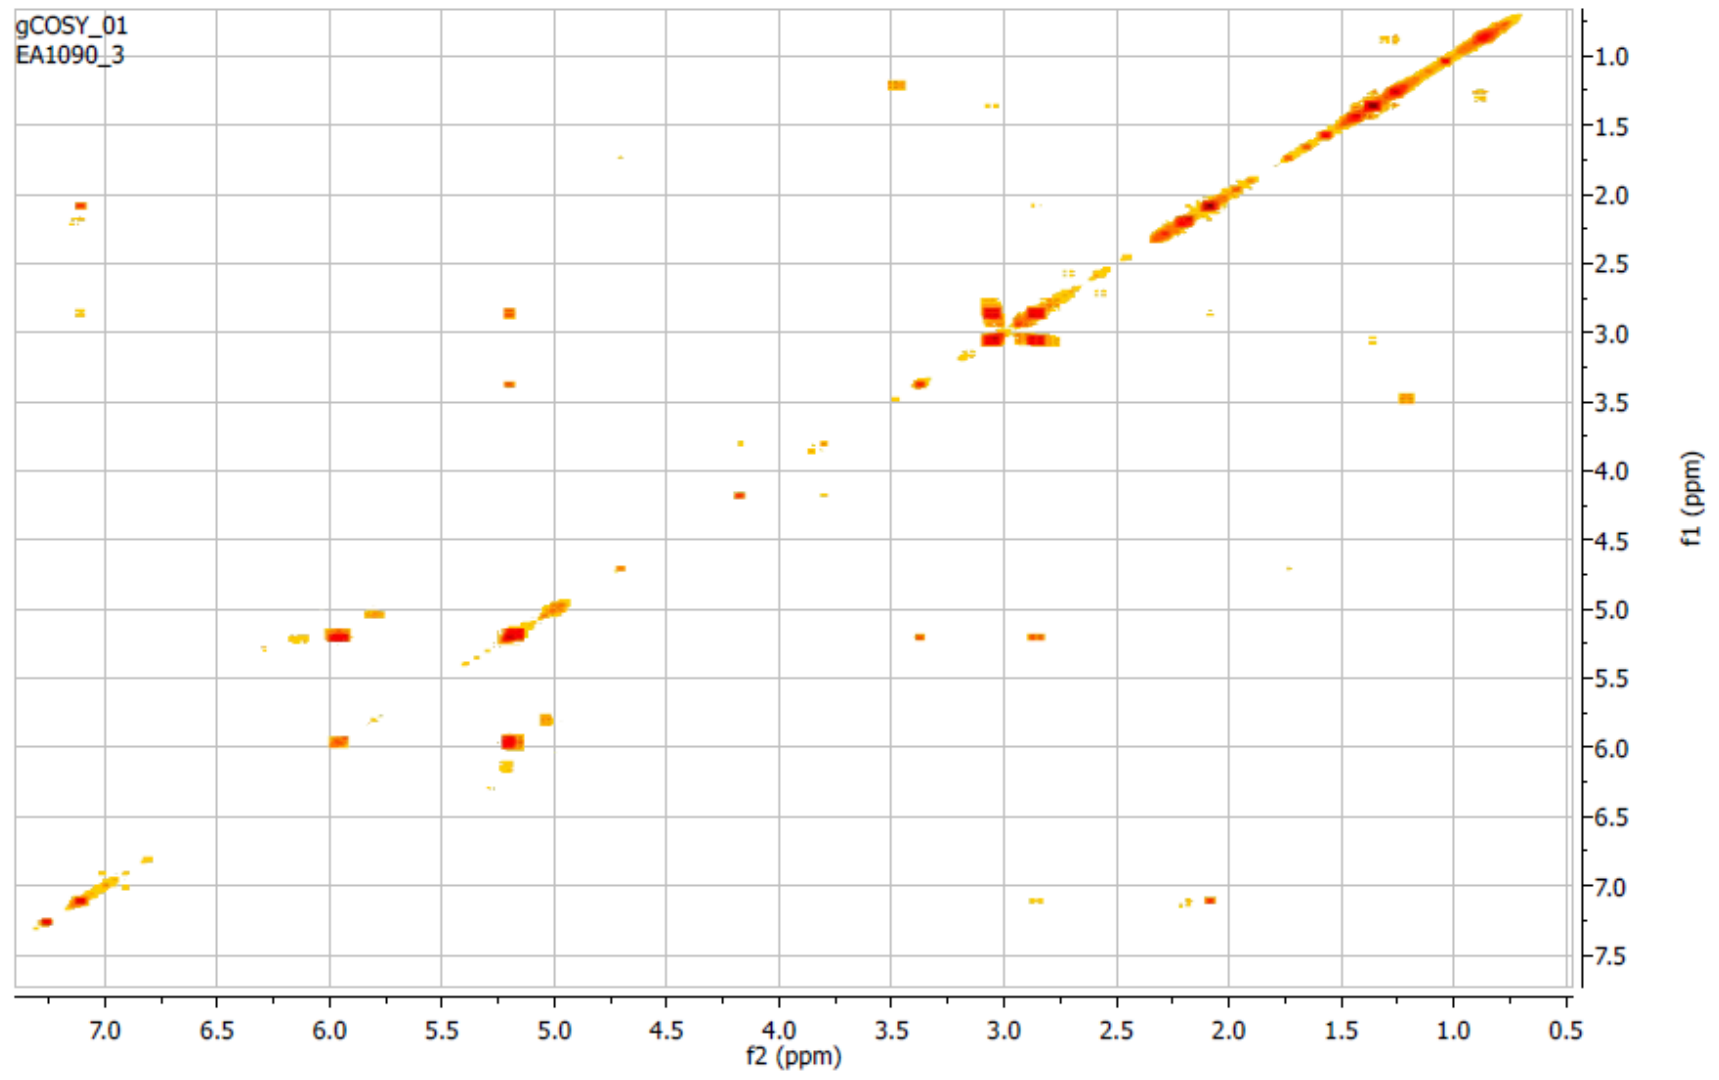

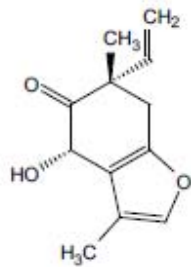

Compound 10, 500 MHz, CDCl<sub>3</sub>

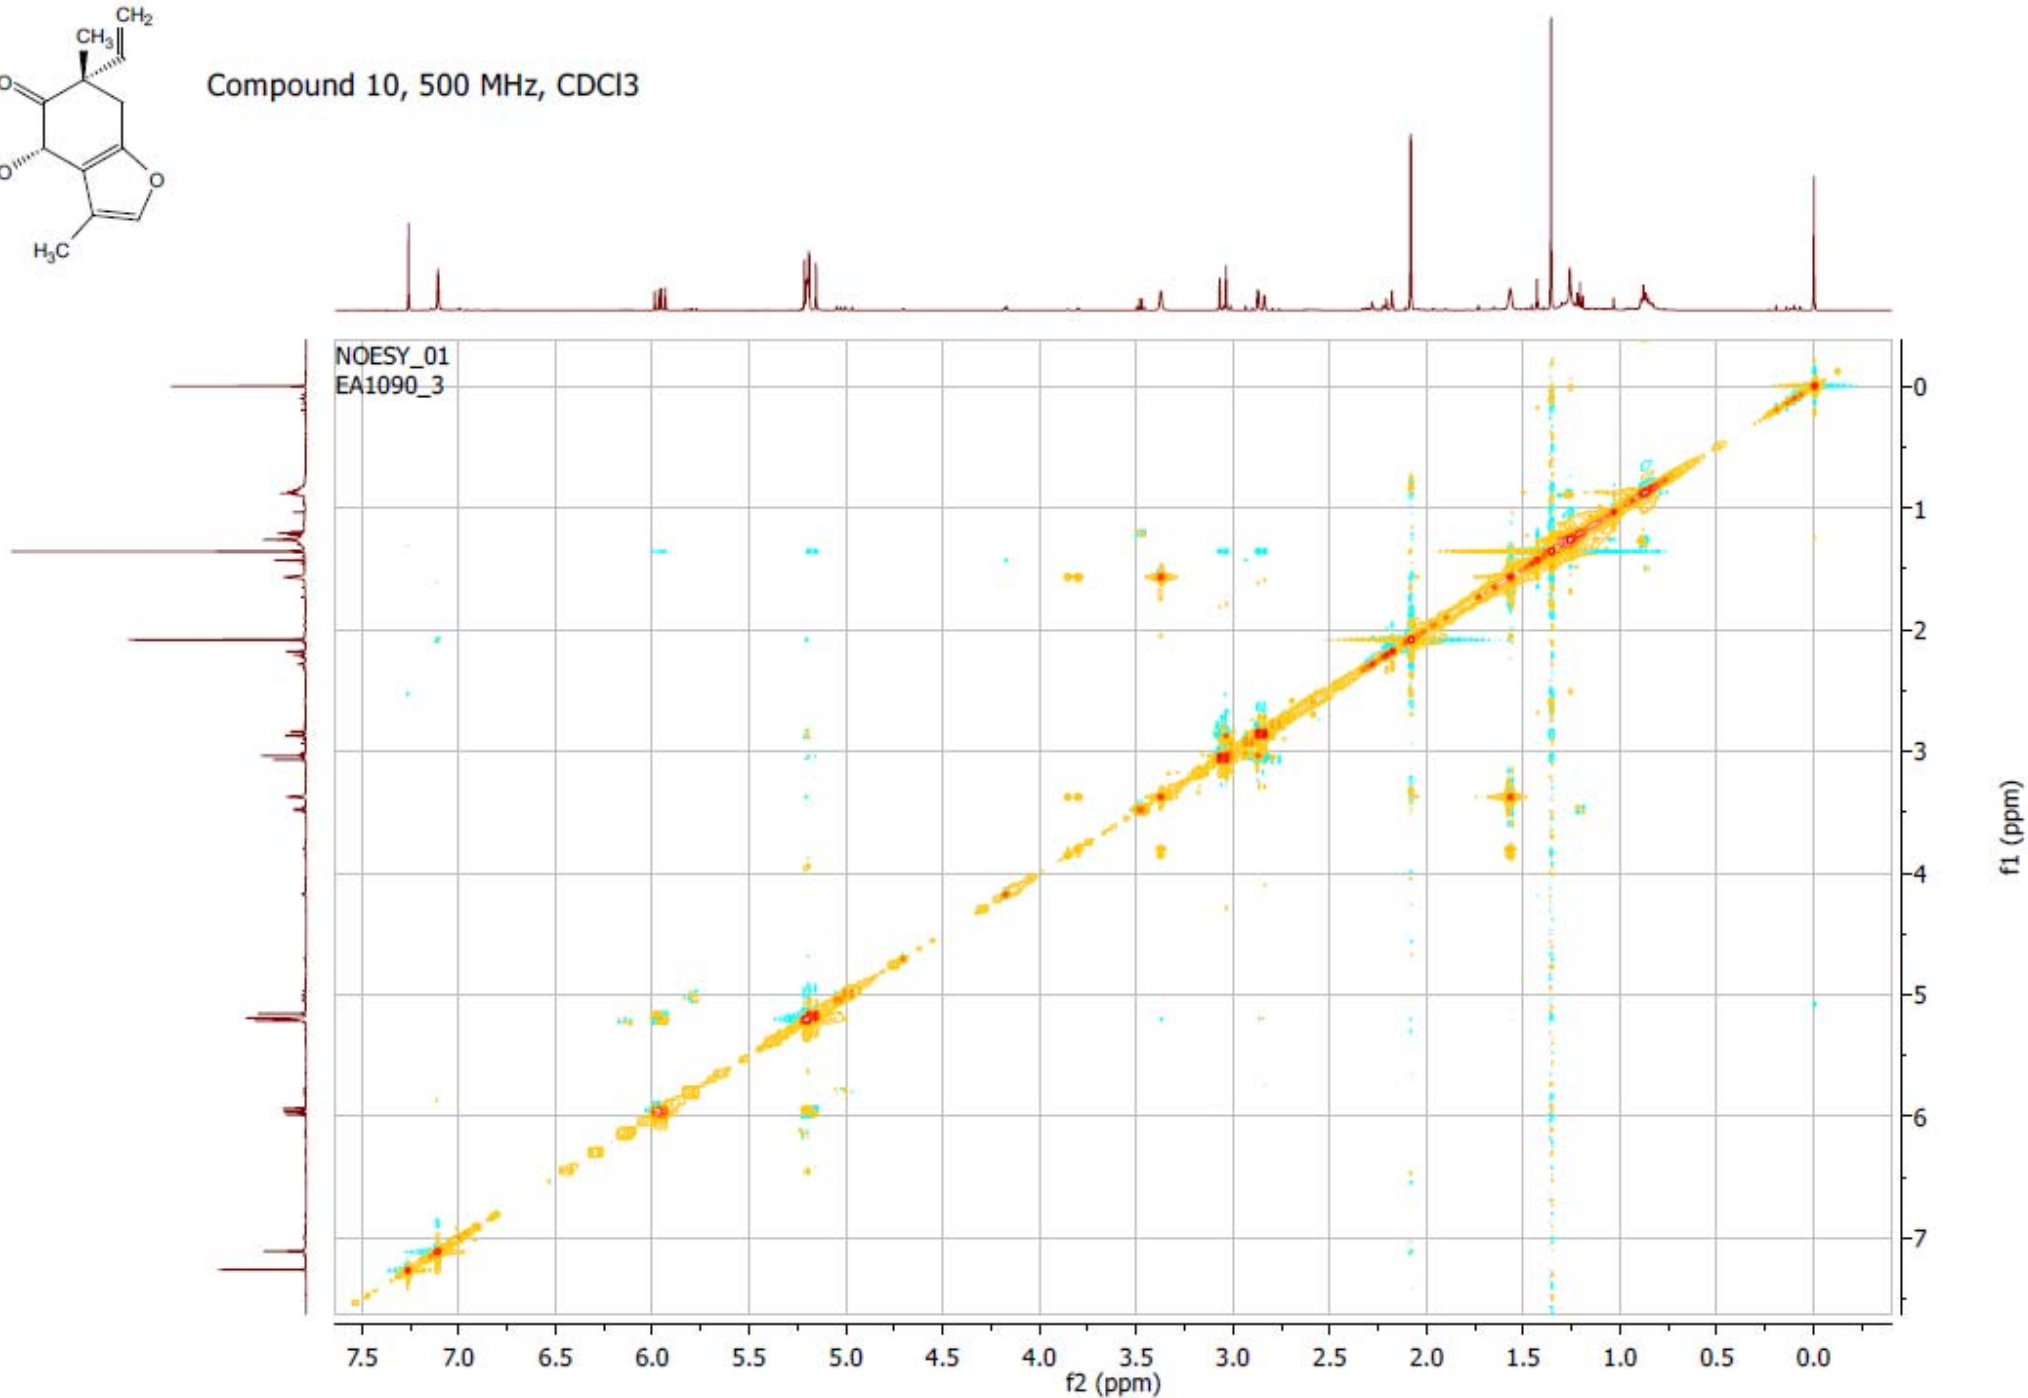

PROTON\_01  
EA1122-for\_NOESY

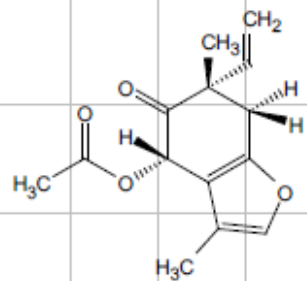

Compound 20, 500 MHz, CDCl<sub>3</sub>

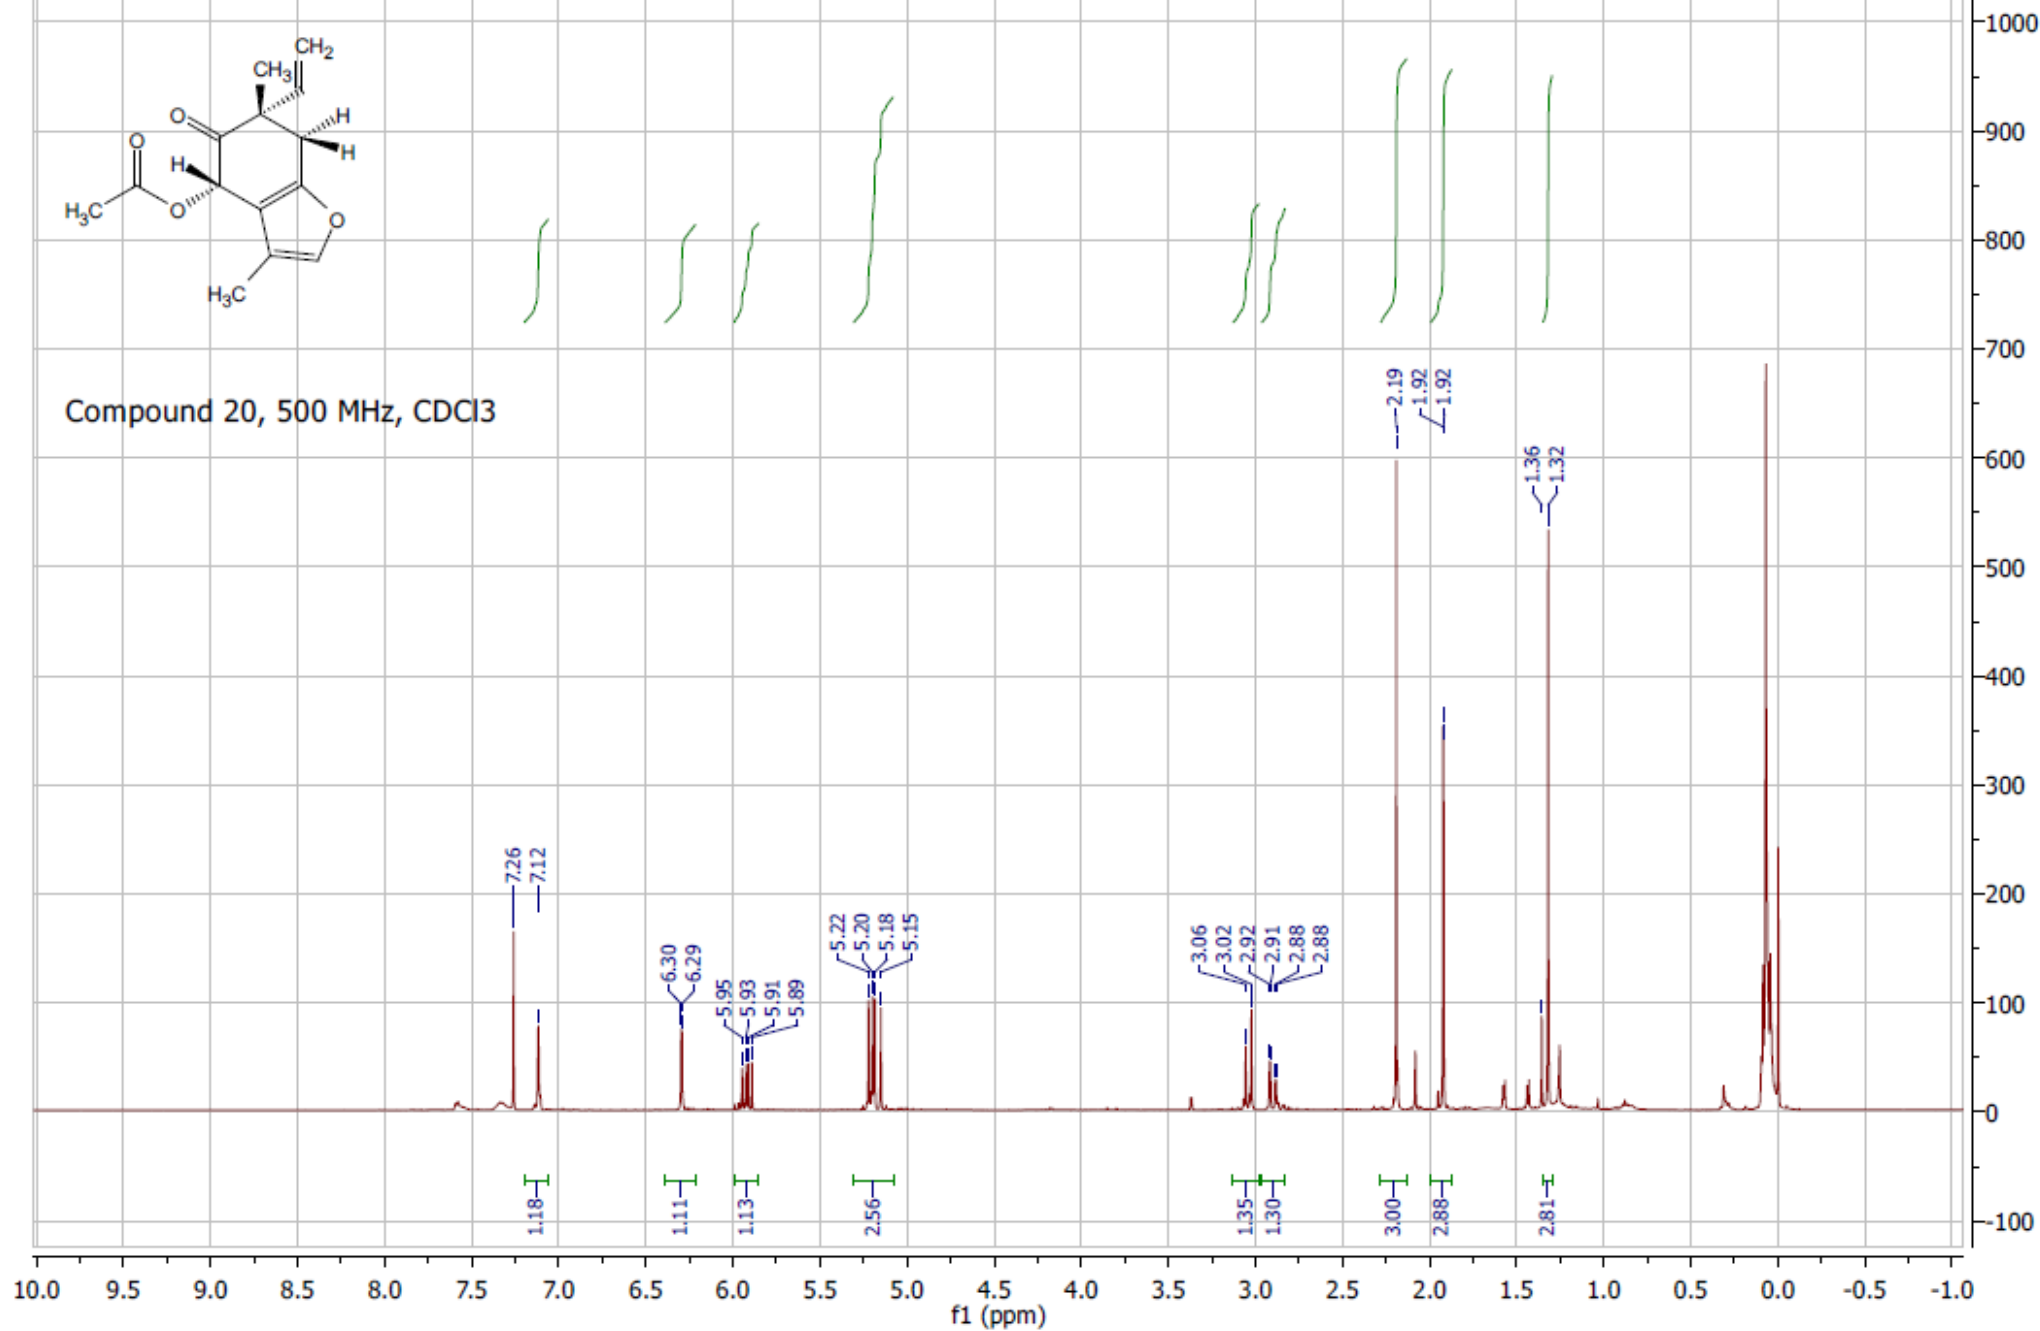



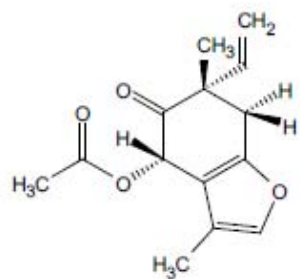

Compound 20, 500 MHz, CDCl<sub>3</sub>

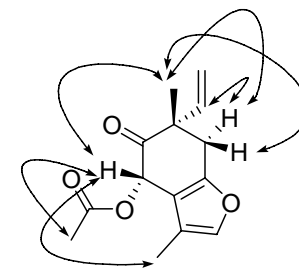

NOE correlations

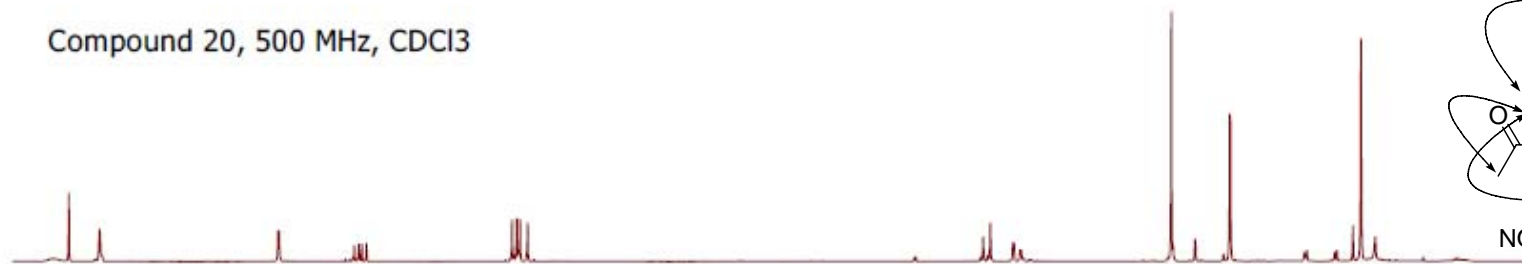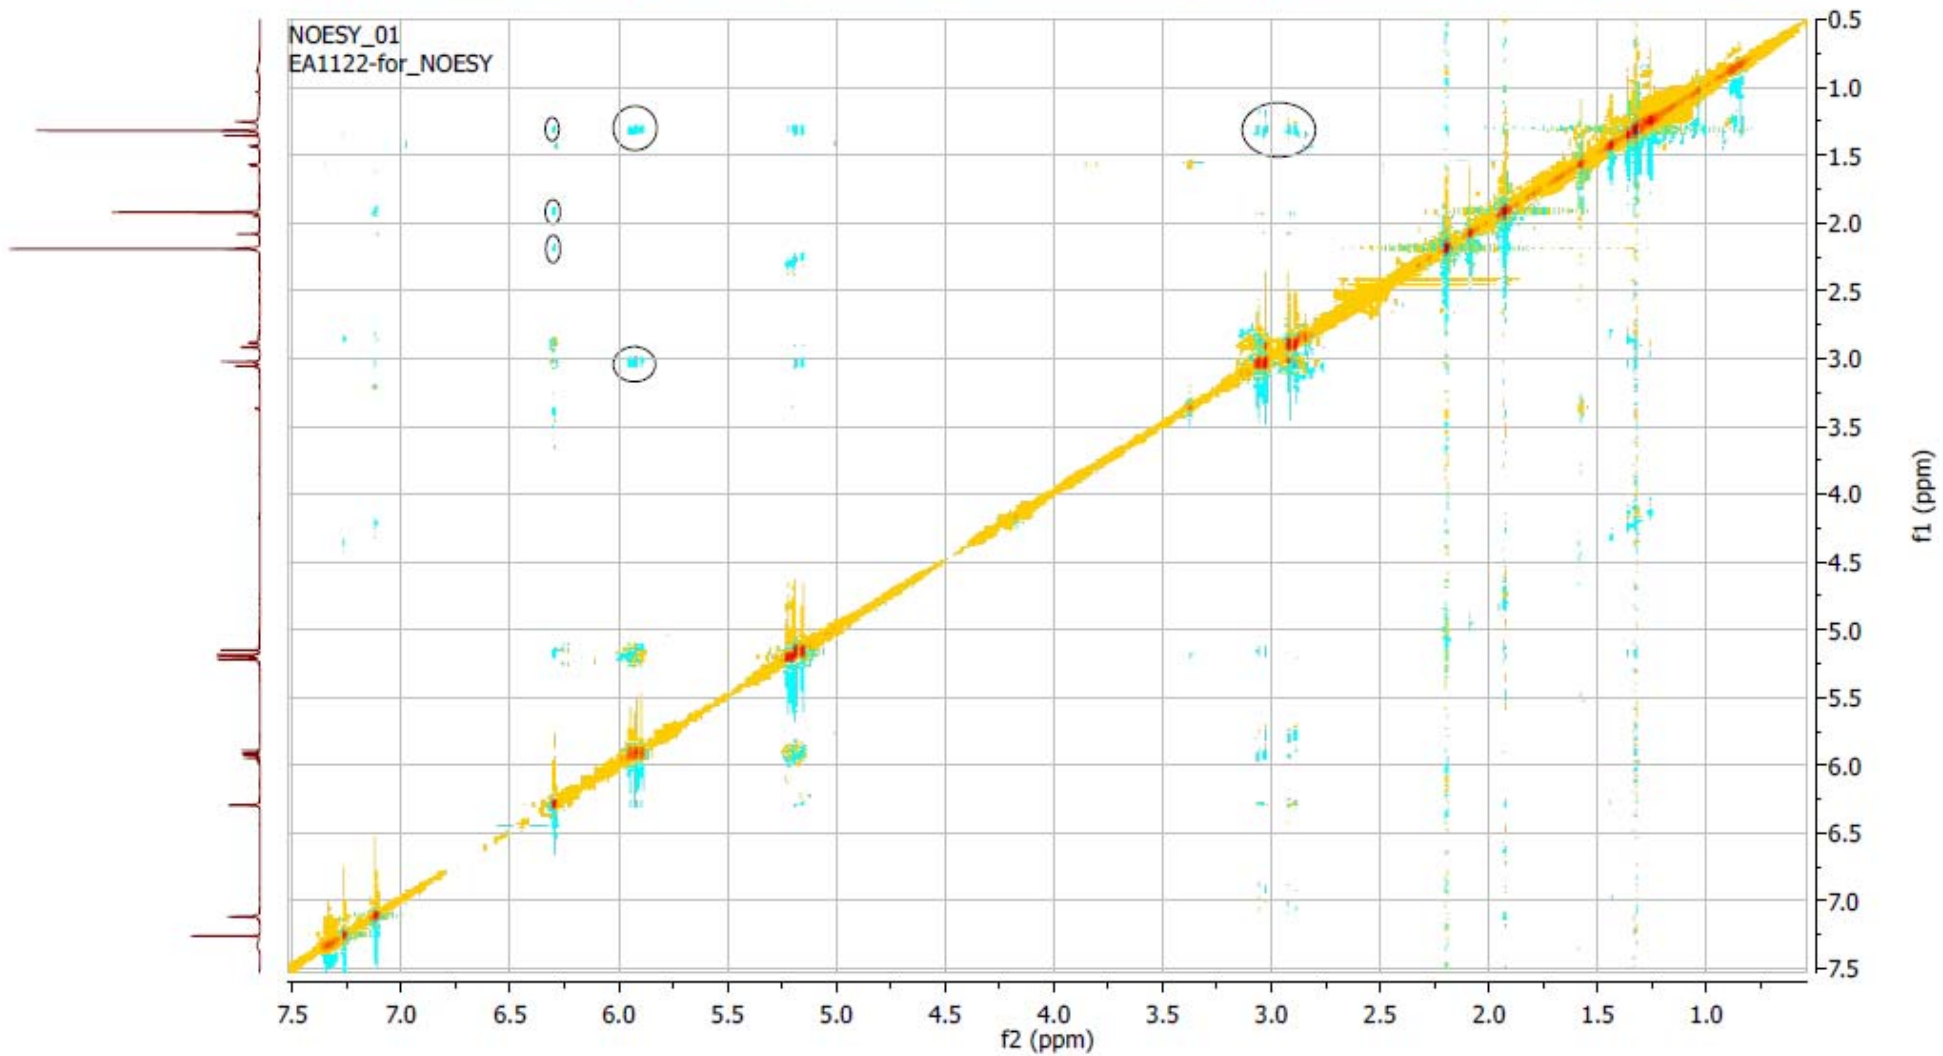

PROTON\_01  
EA1096-K2CO3\_OH-ketone\_furan\_crude

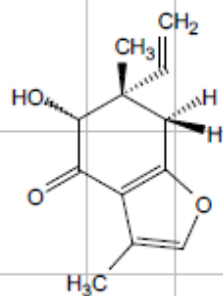

Compound 11, 500 MHz, CDCl3

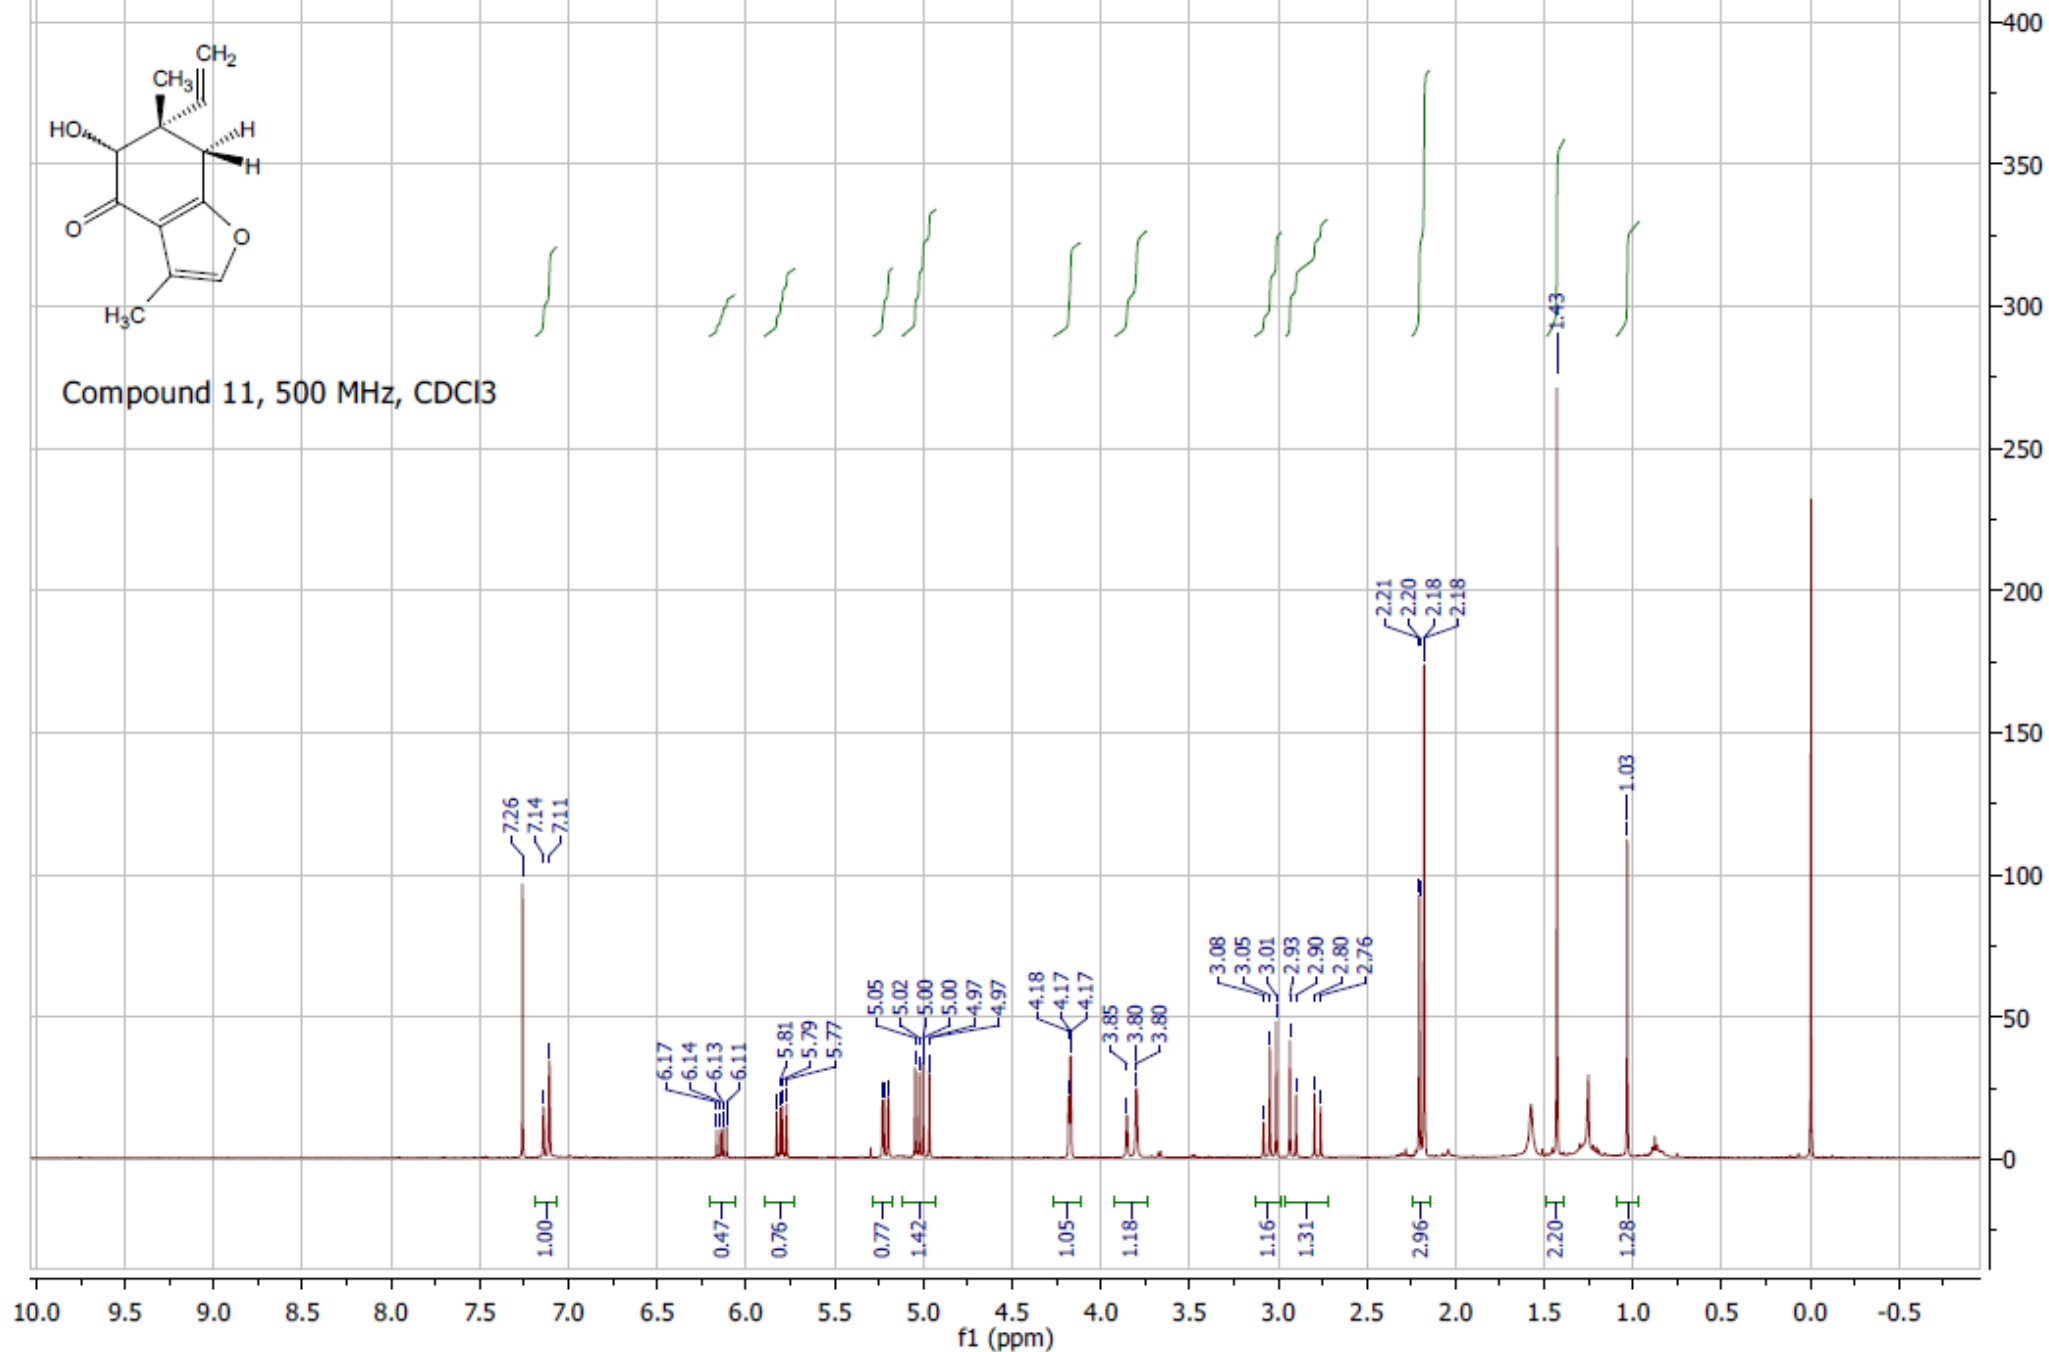

CARBON 01  
EA10959K2CO3\_OH-ketone\_furan crude

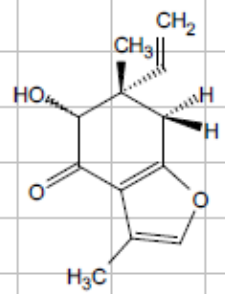

Compound 11, 125 MHz, CDCl3

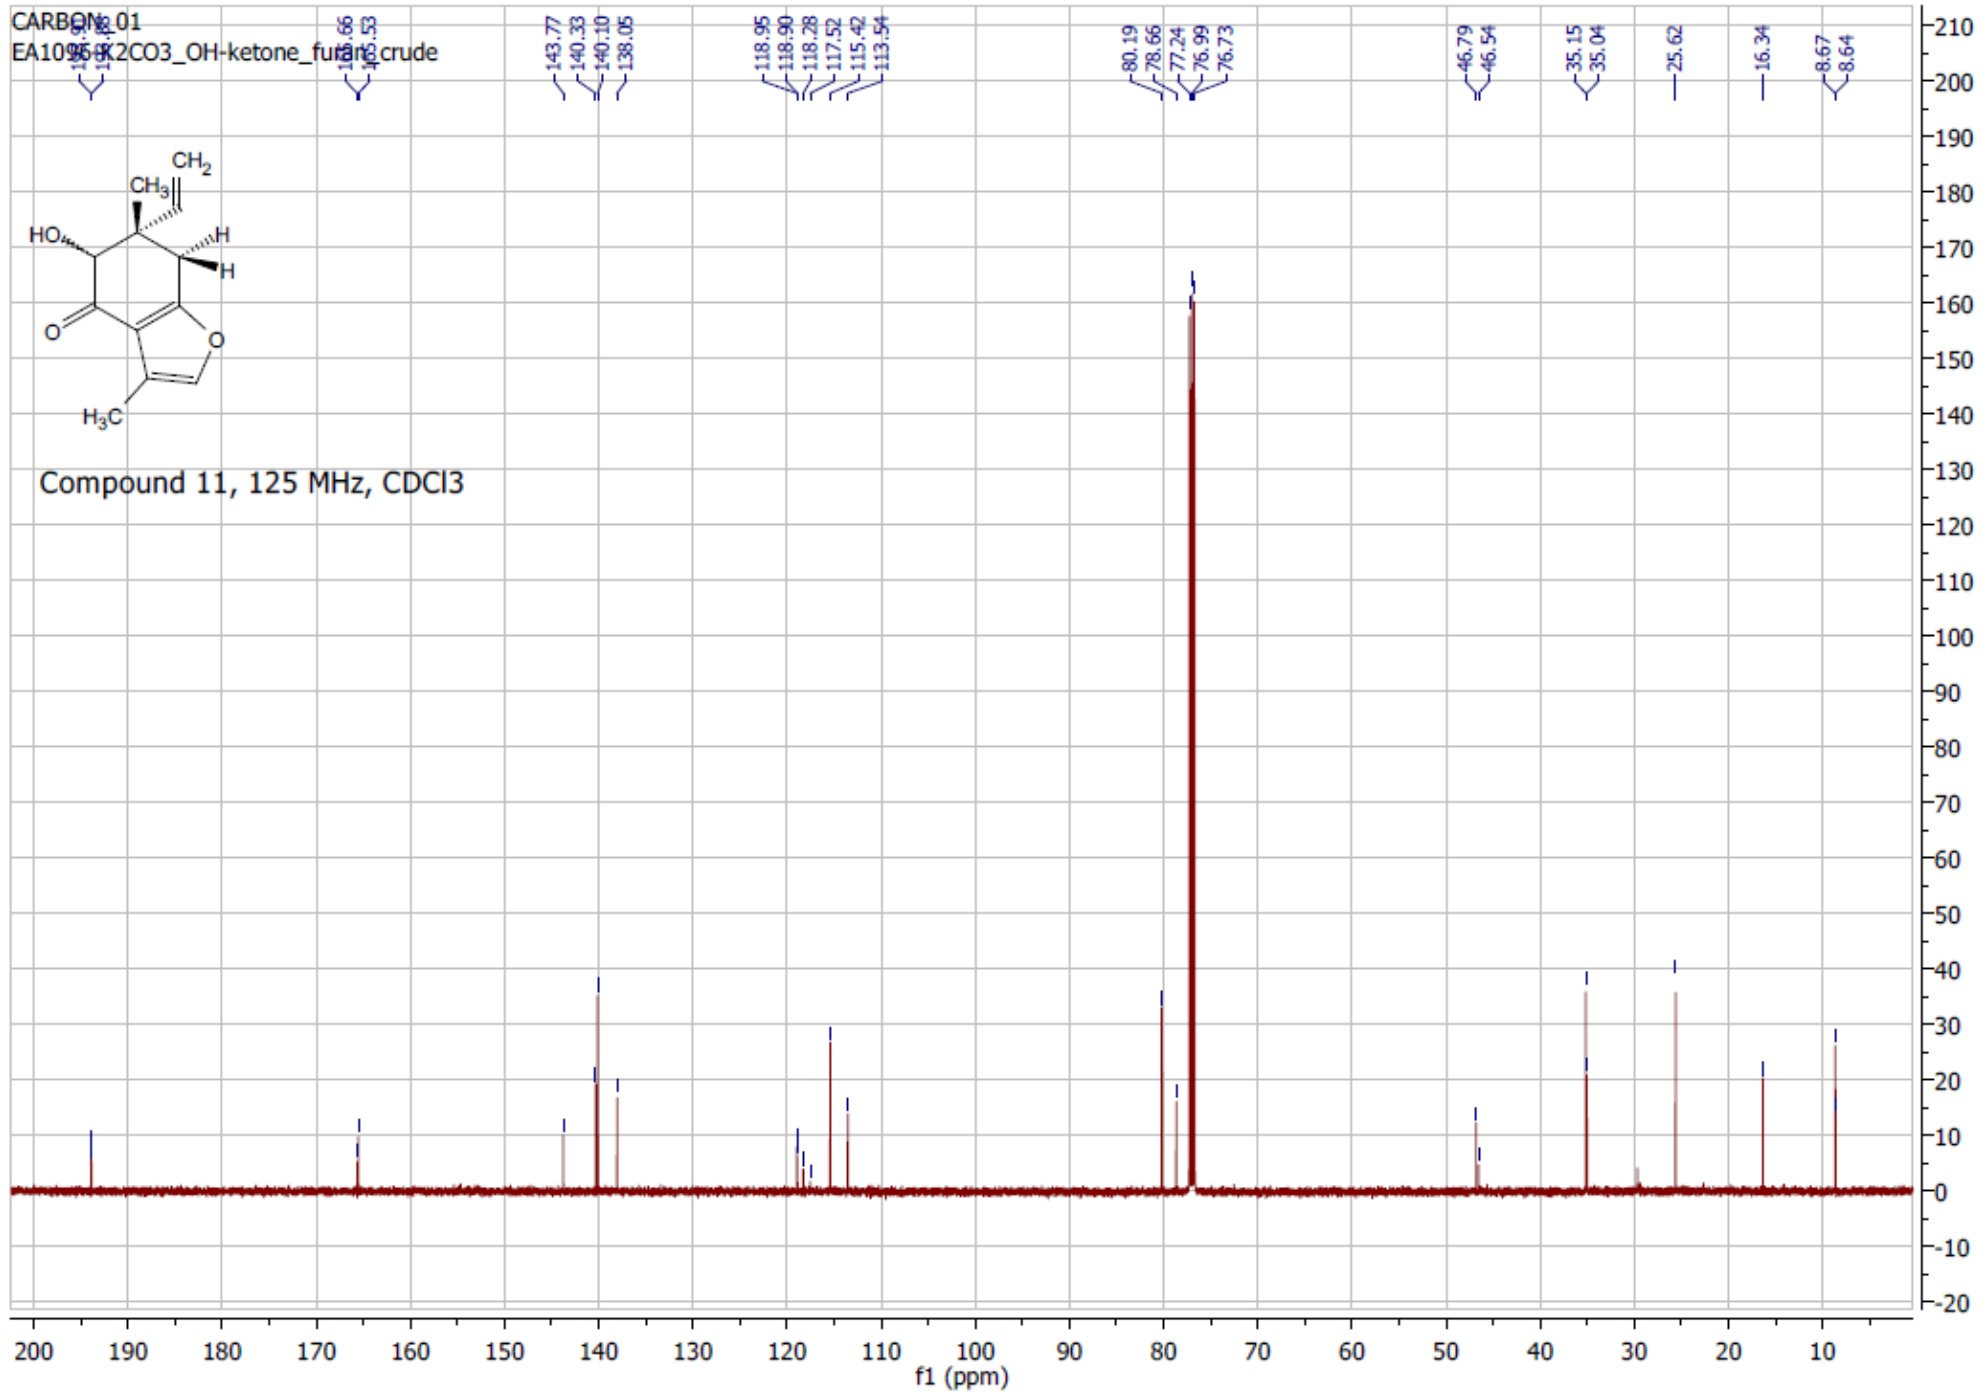

VDS 26 (10melis OH-Me)

5 th spot

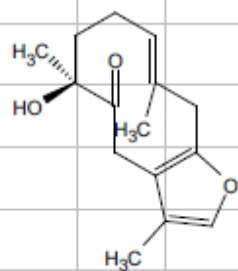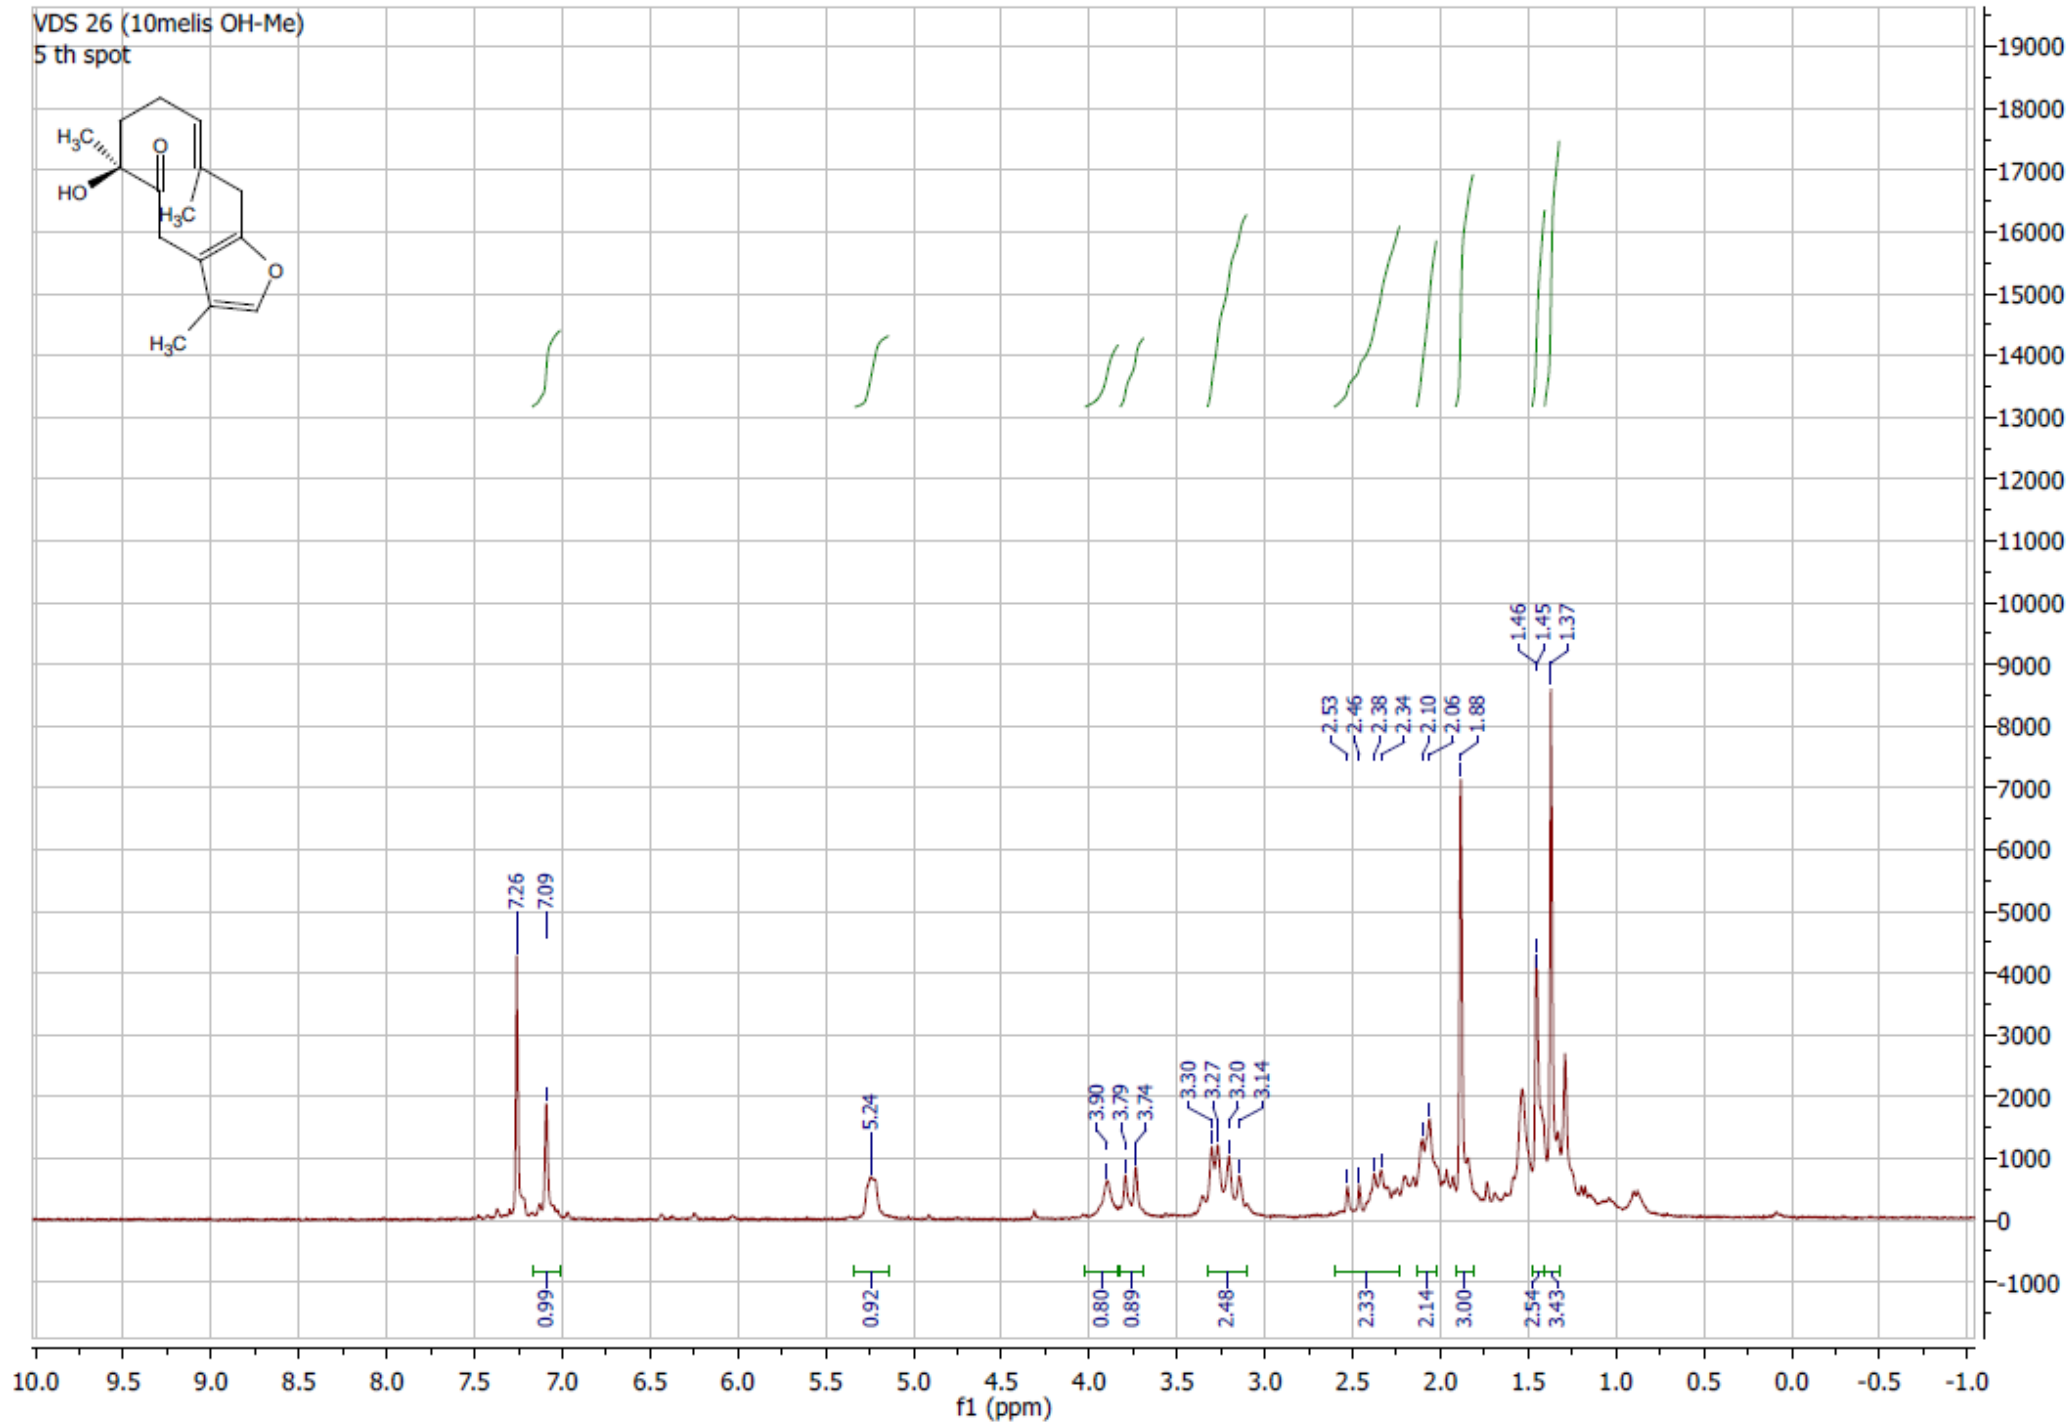

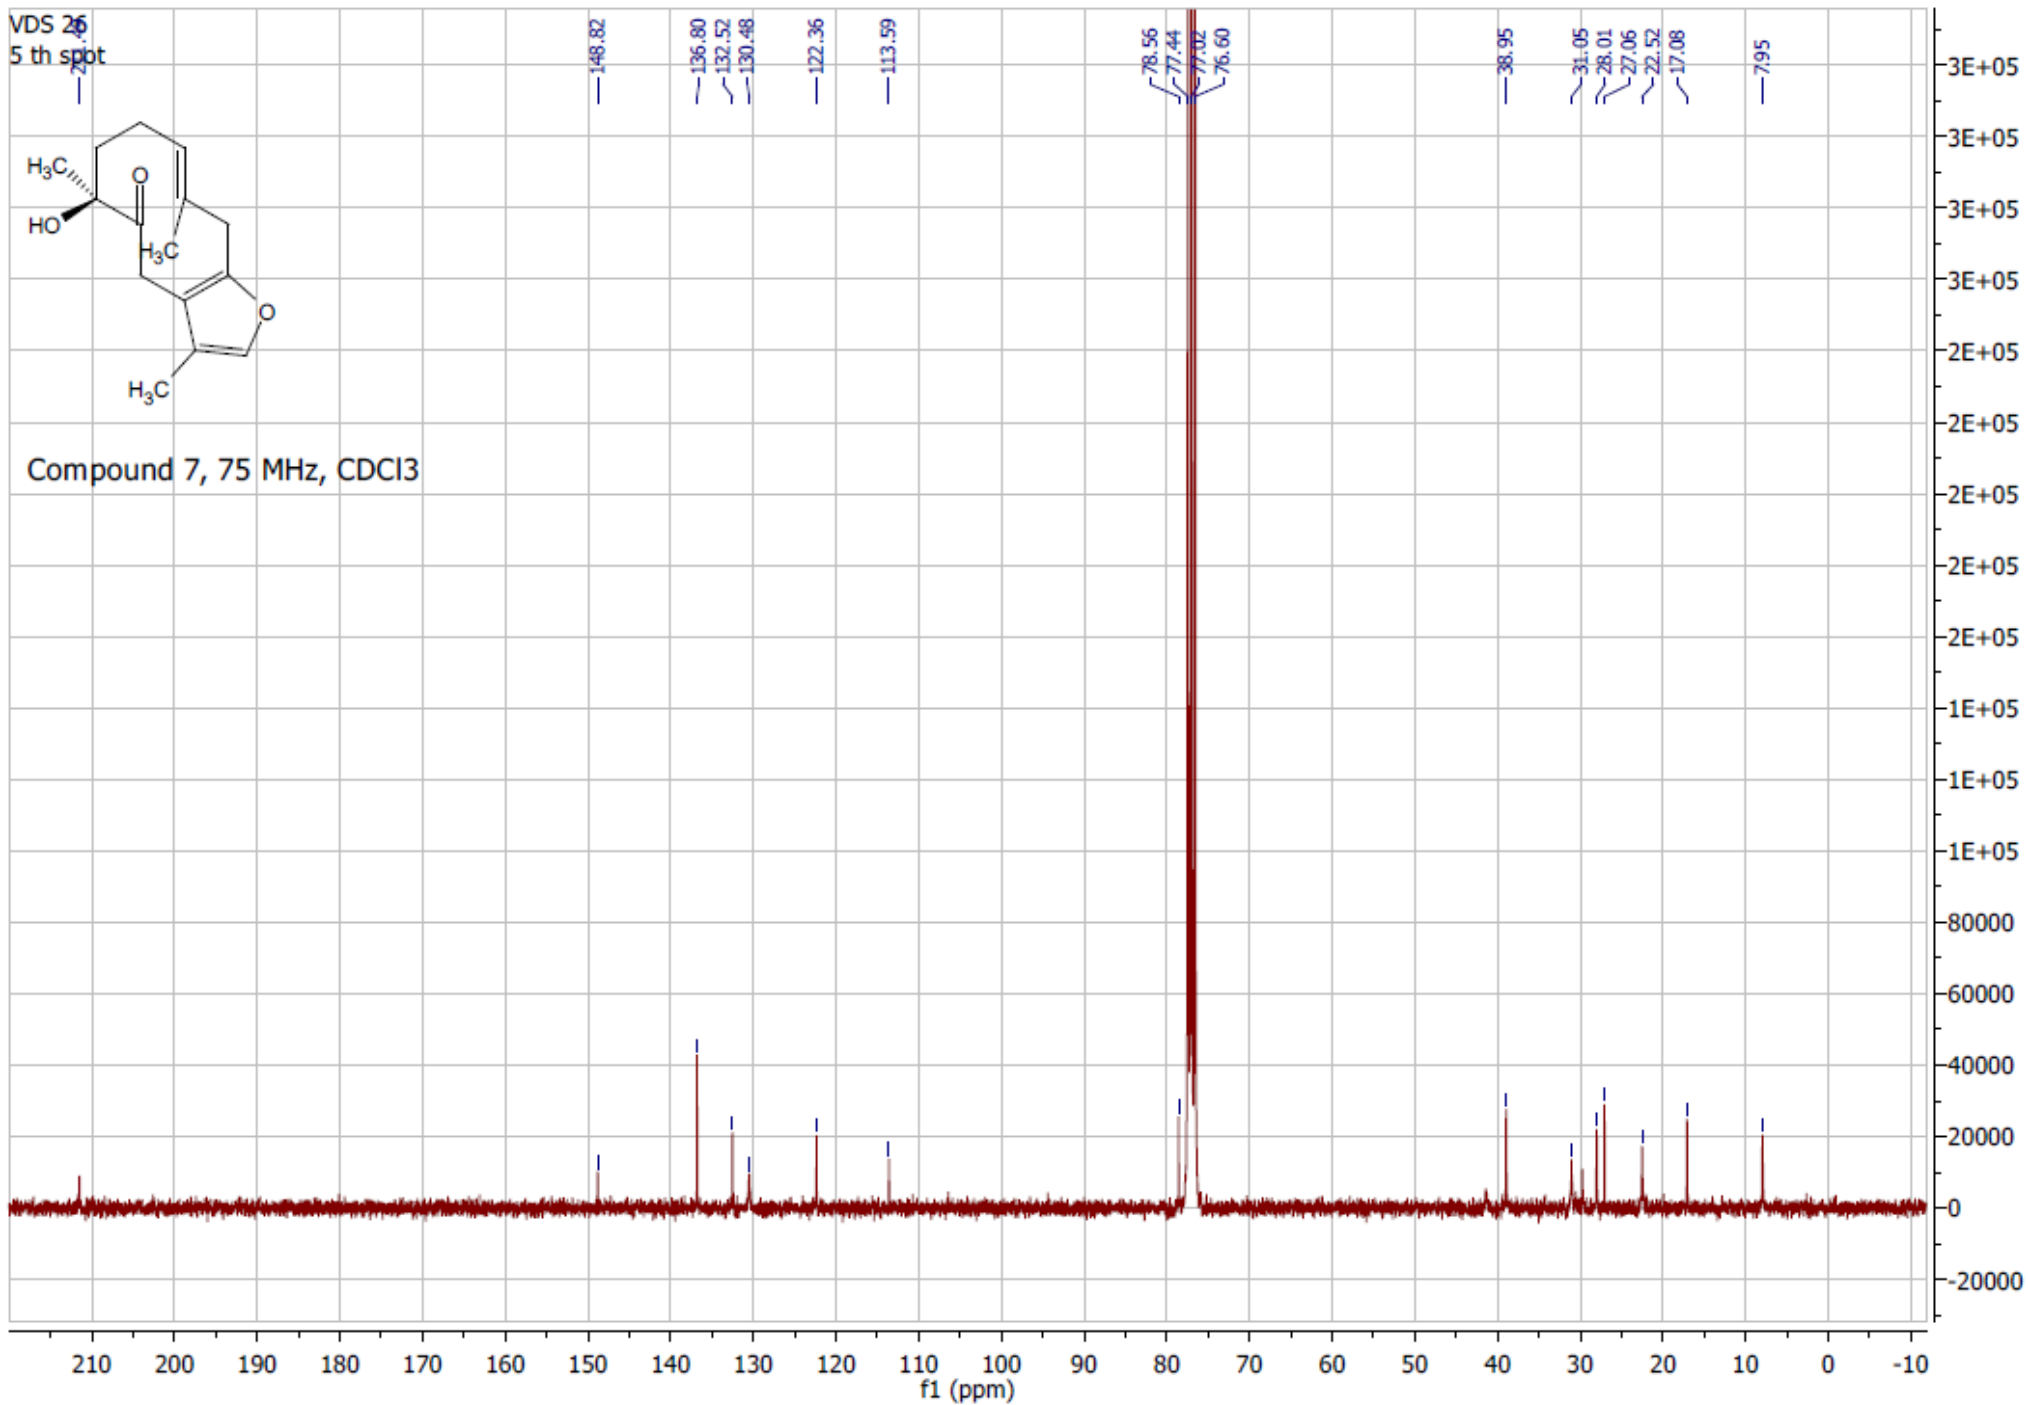

EA1301  
10melis-OH again

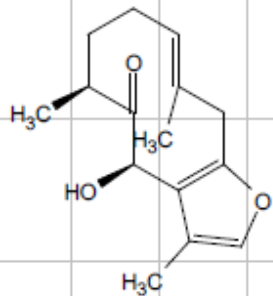

Compound 13, 300 MHz, CDCl3

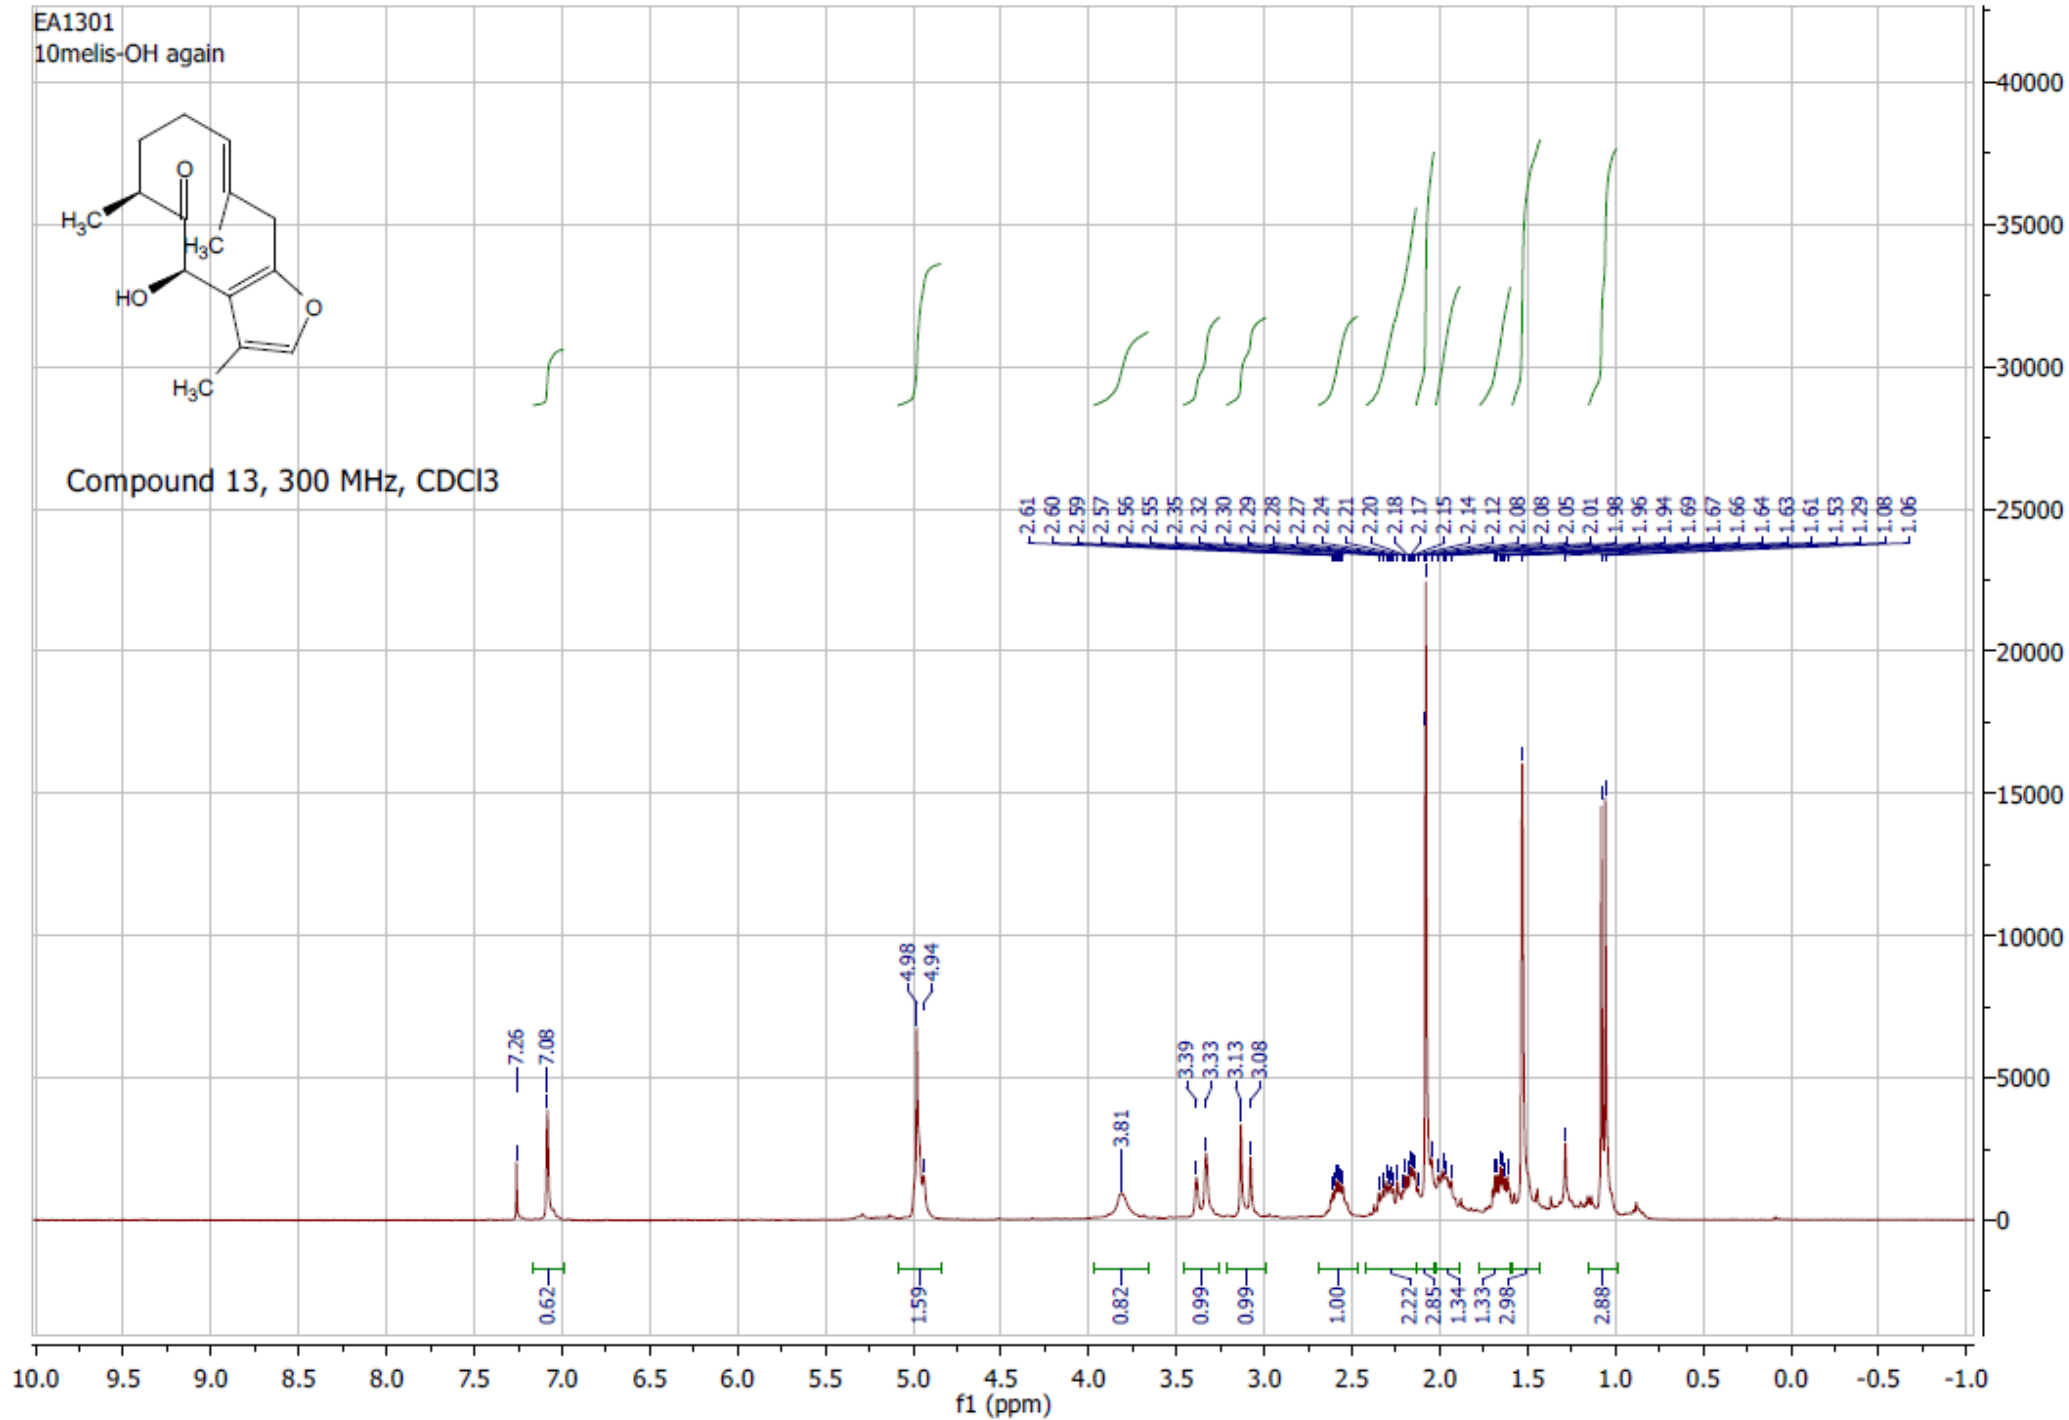

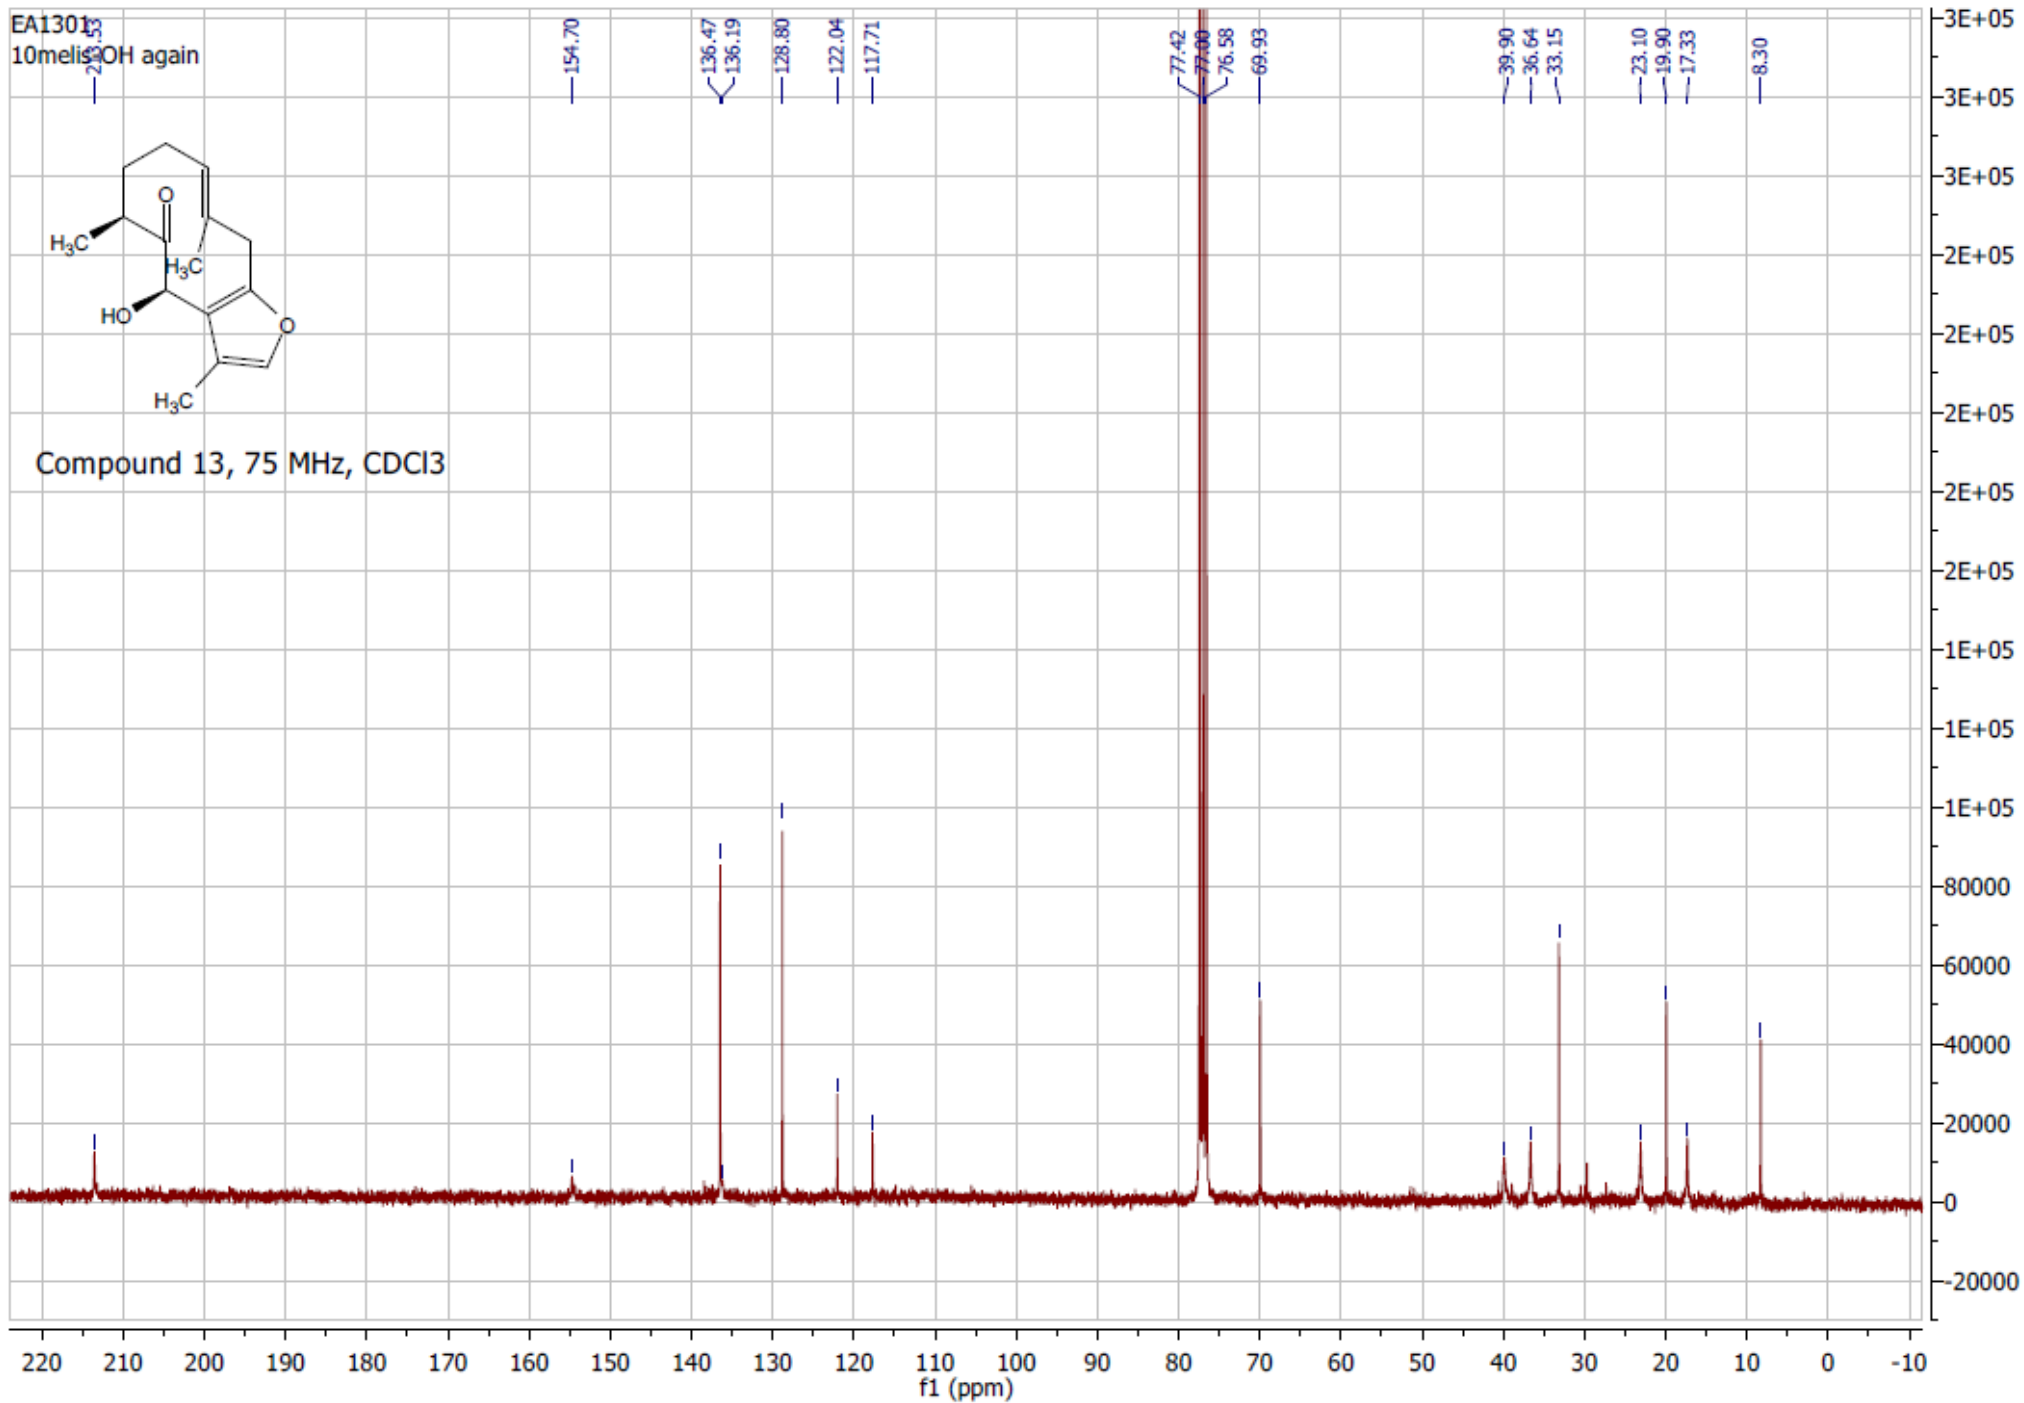

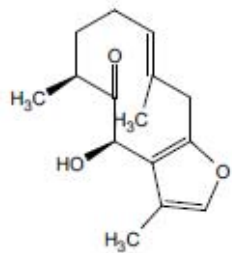

Compound 13, 500 MHz, CDCl<sub>3</sub>

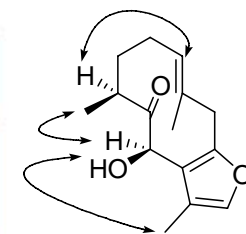

NOE correlations

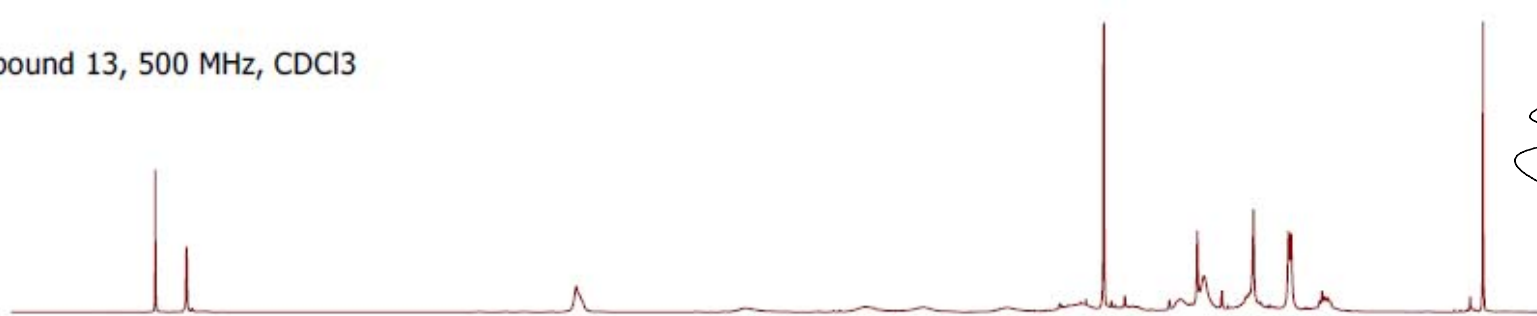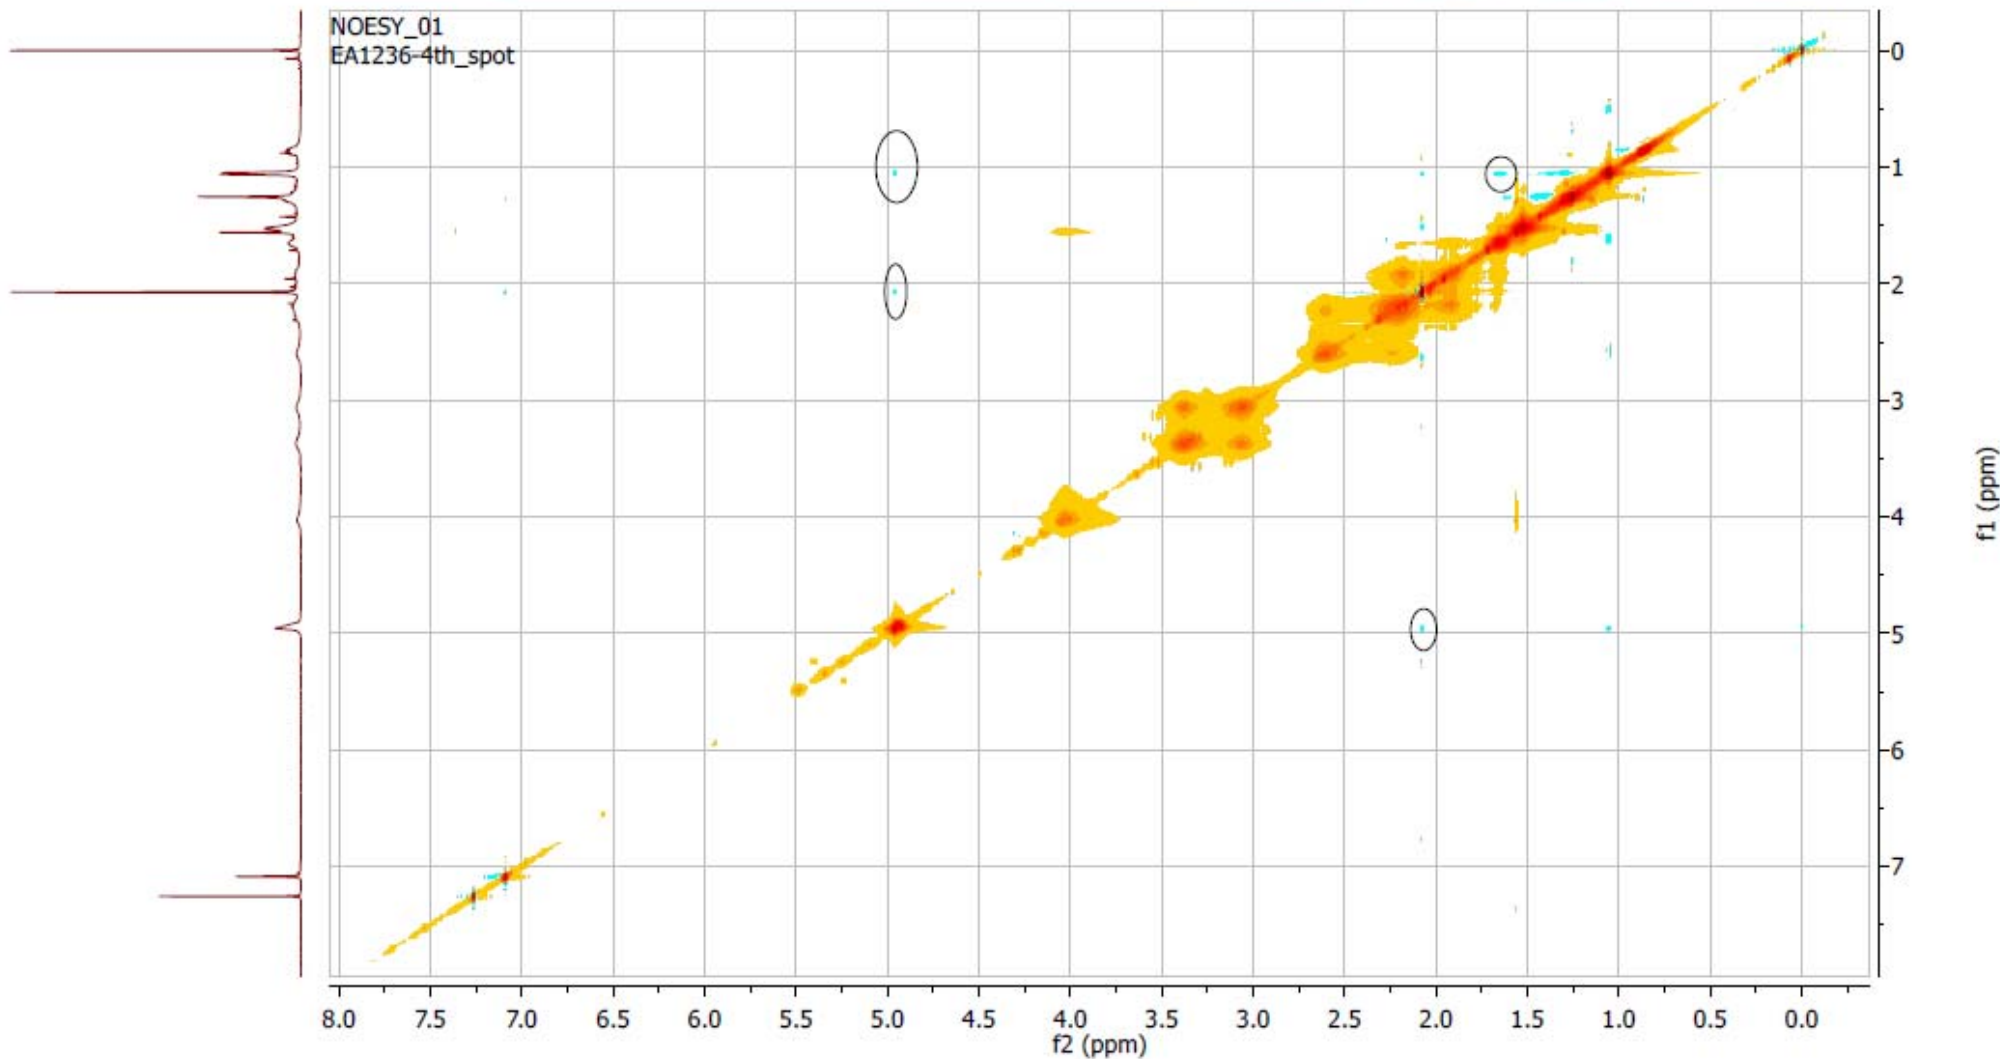



PROTON\_01  
VDS103\_

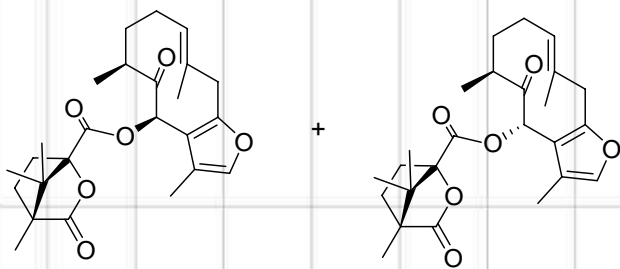

Camphanic acid derivatization of compound 13  
500 MHz CDCl<sub>3</sub>

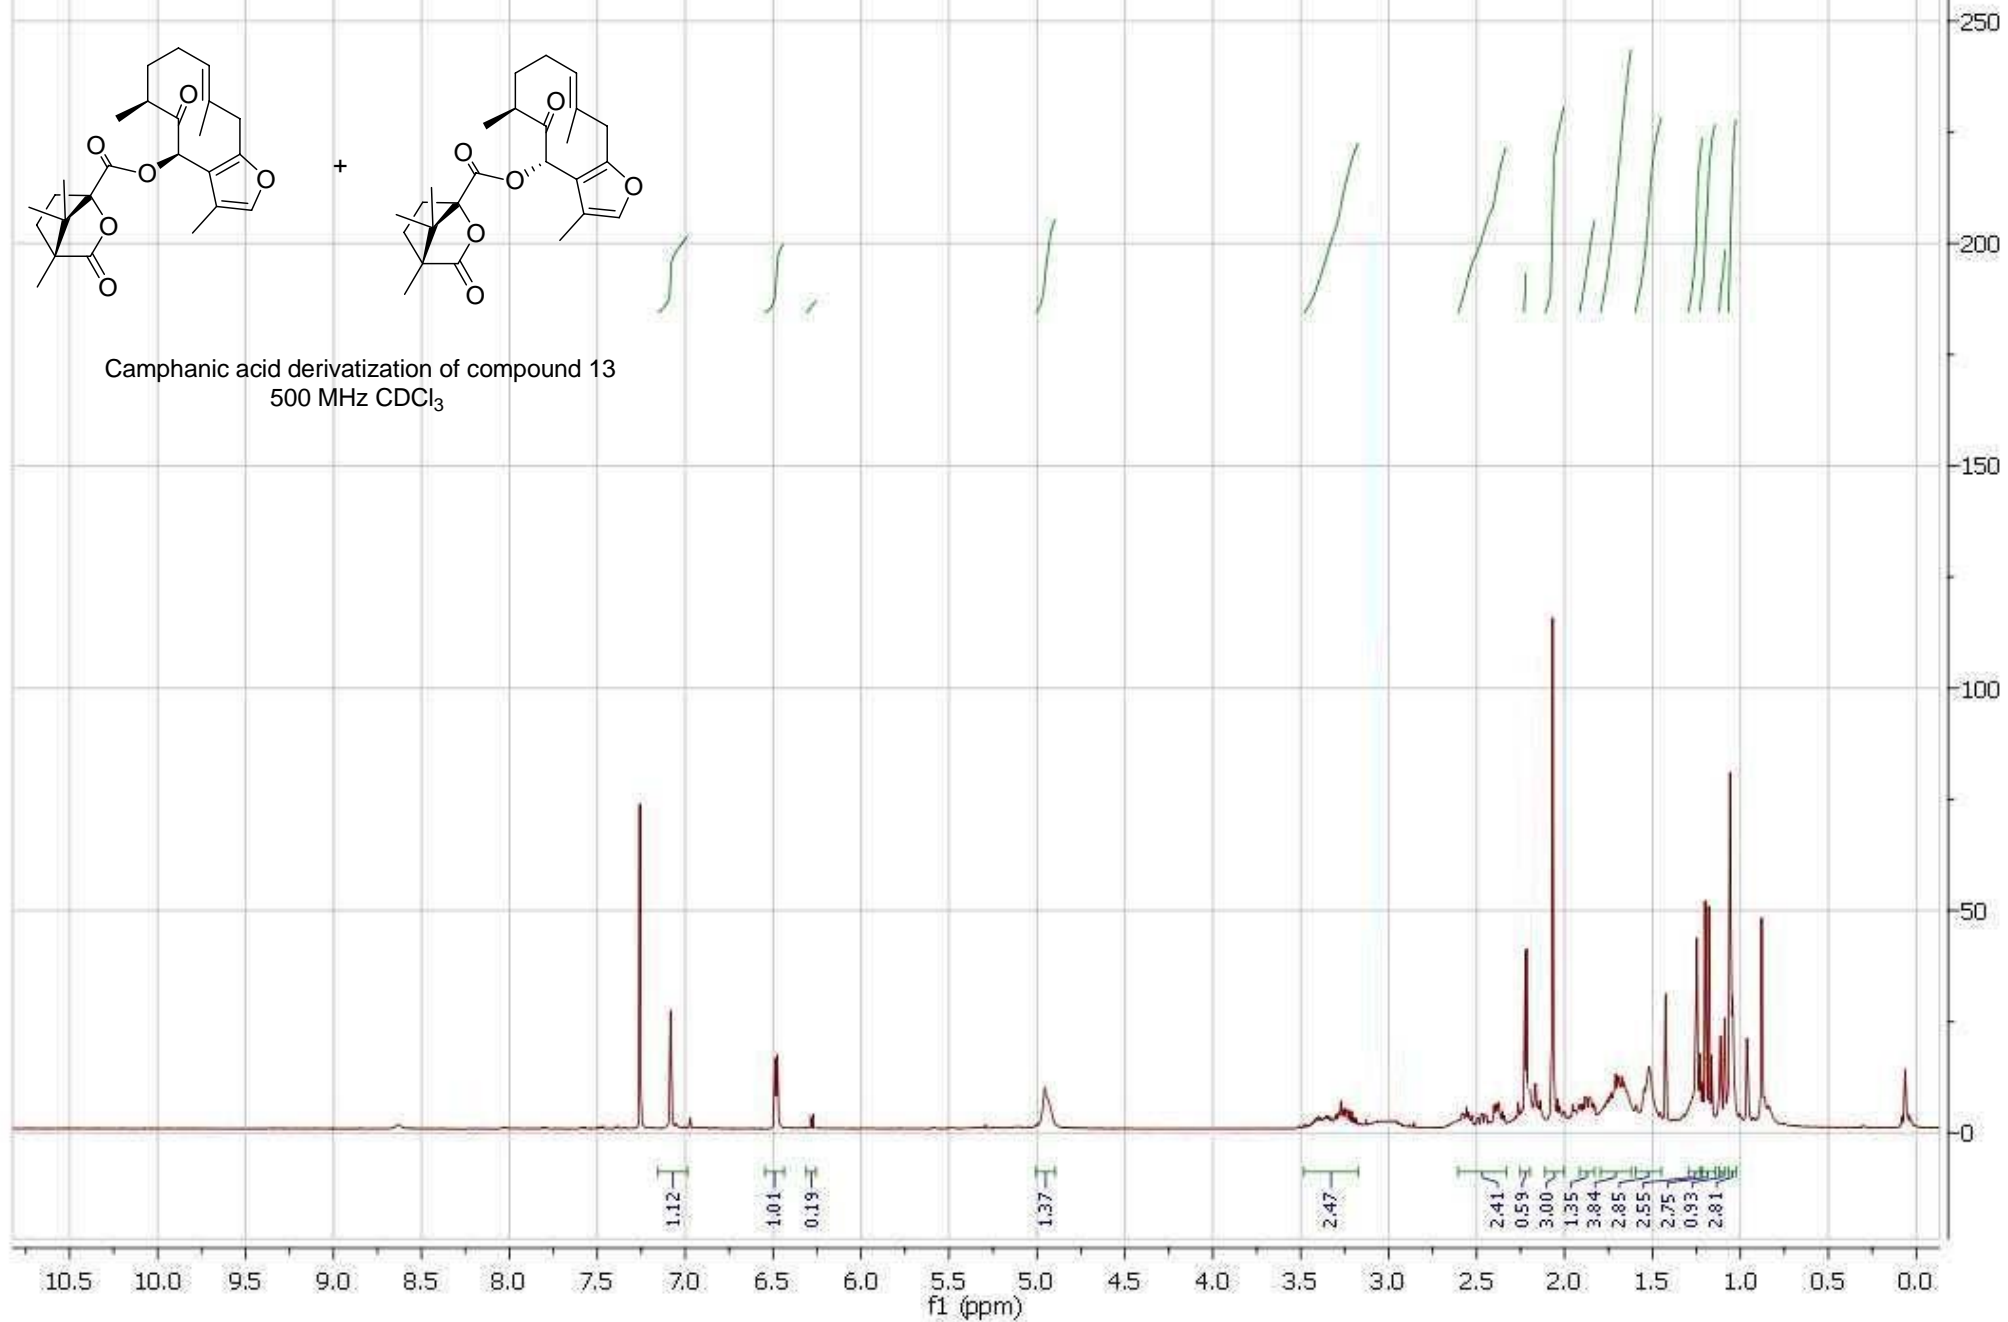

EA1302  
10melis-Oh-ketofuran 3rd spot

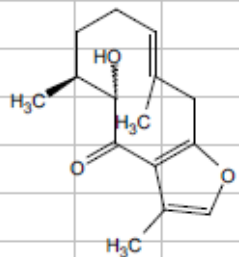

Compound 14, 300 MHz, CDCl<sub>3</sub>

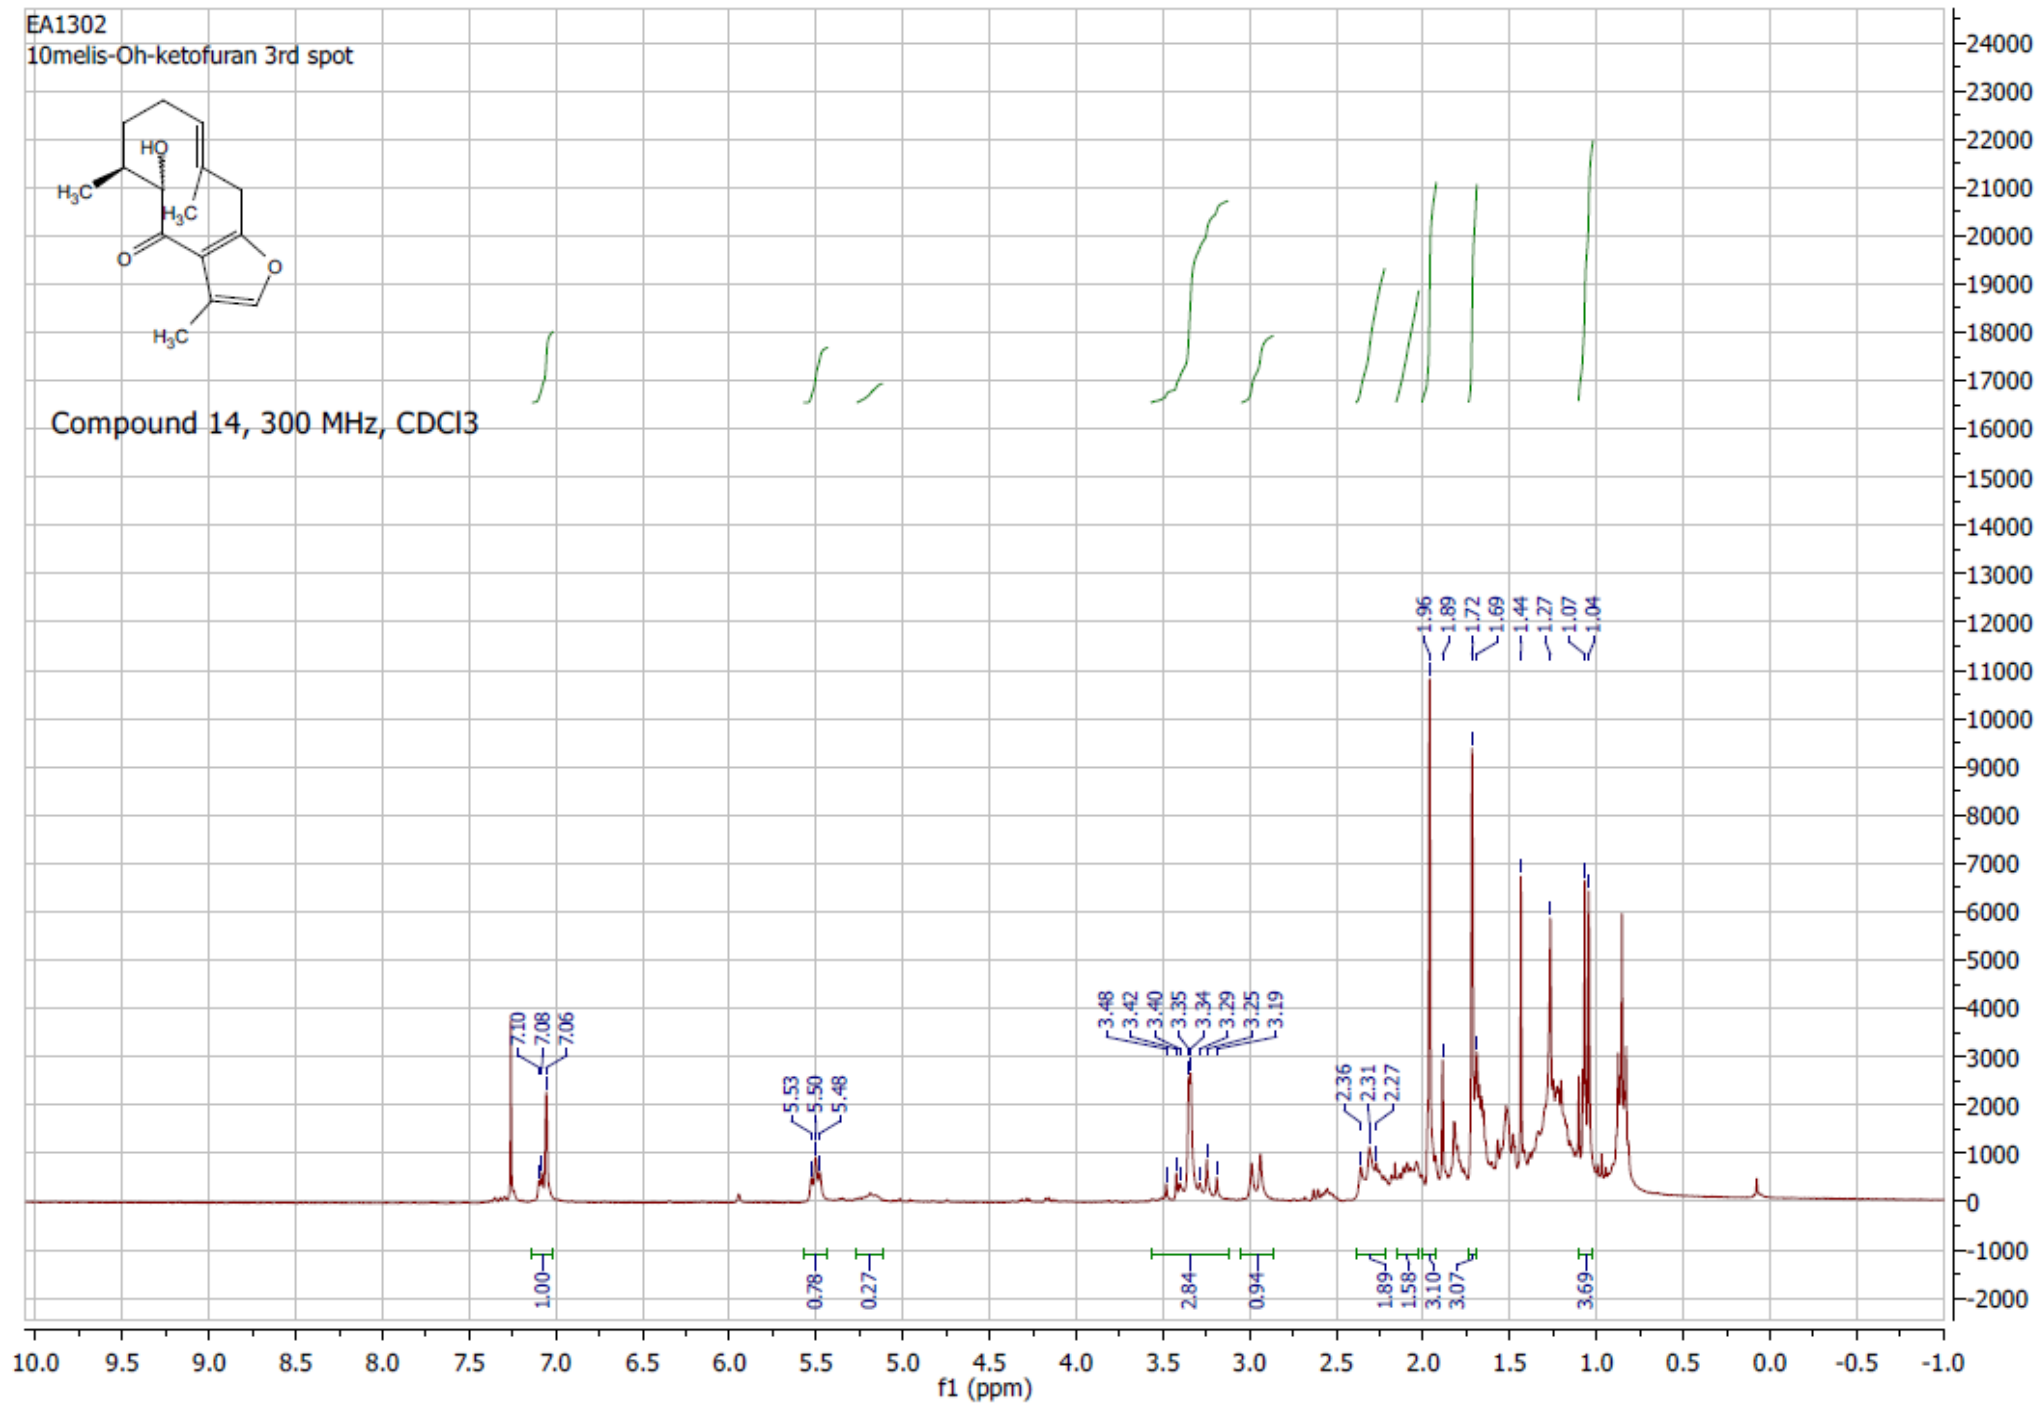

EA1237  
oxaziridine 10melis 3rd spot 35C

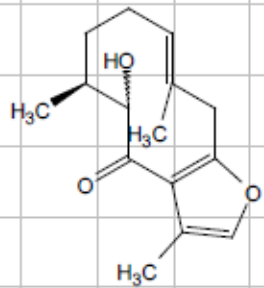

Compound 14, 75 MHz, CDCl<sub>3</sub>

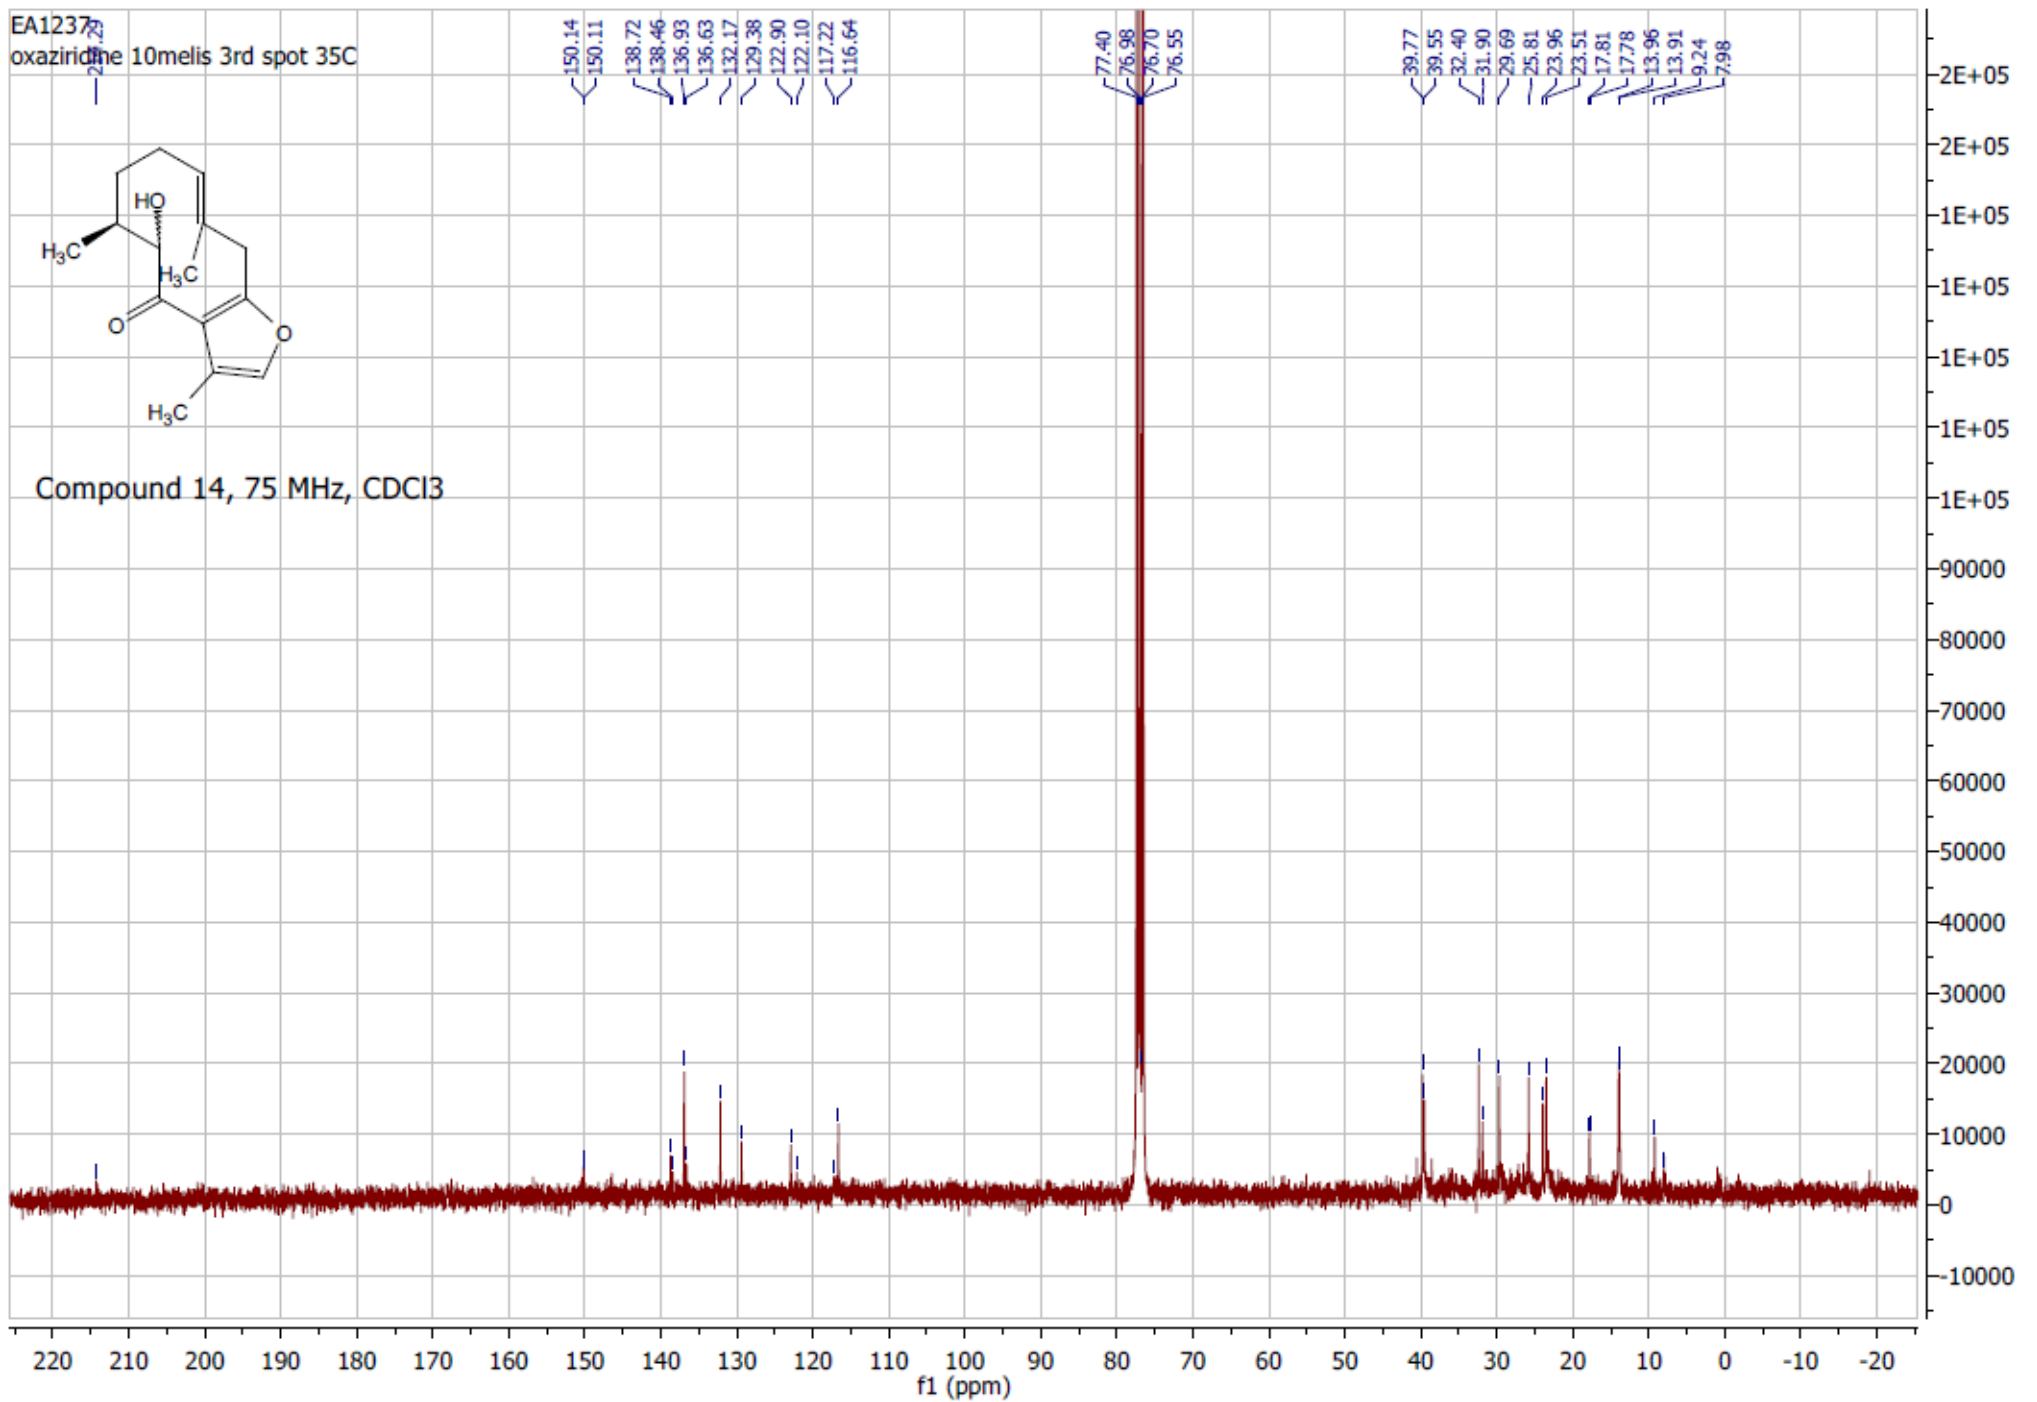

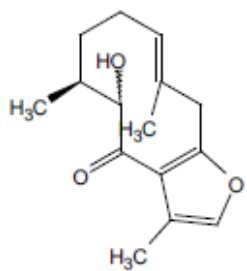

Compound 14, 500 MHz, CDCl<sub>3</sub>

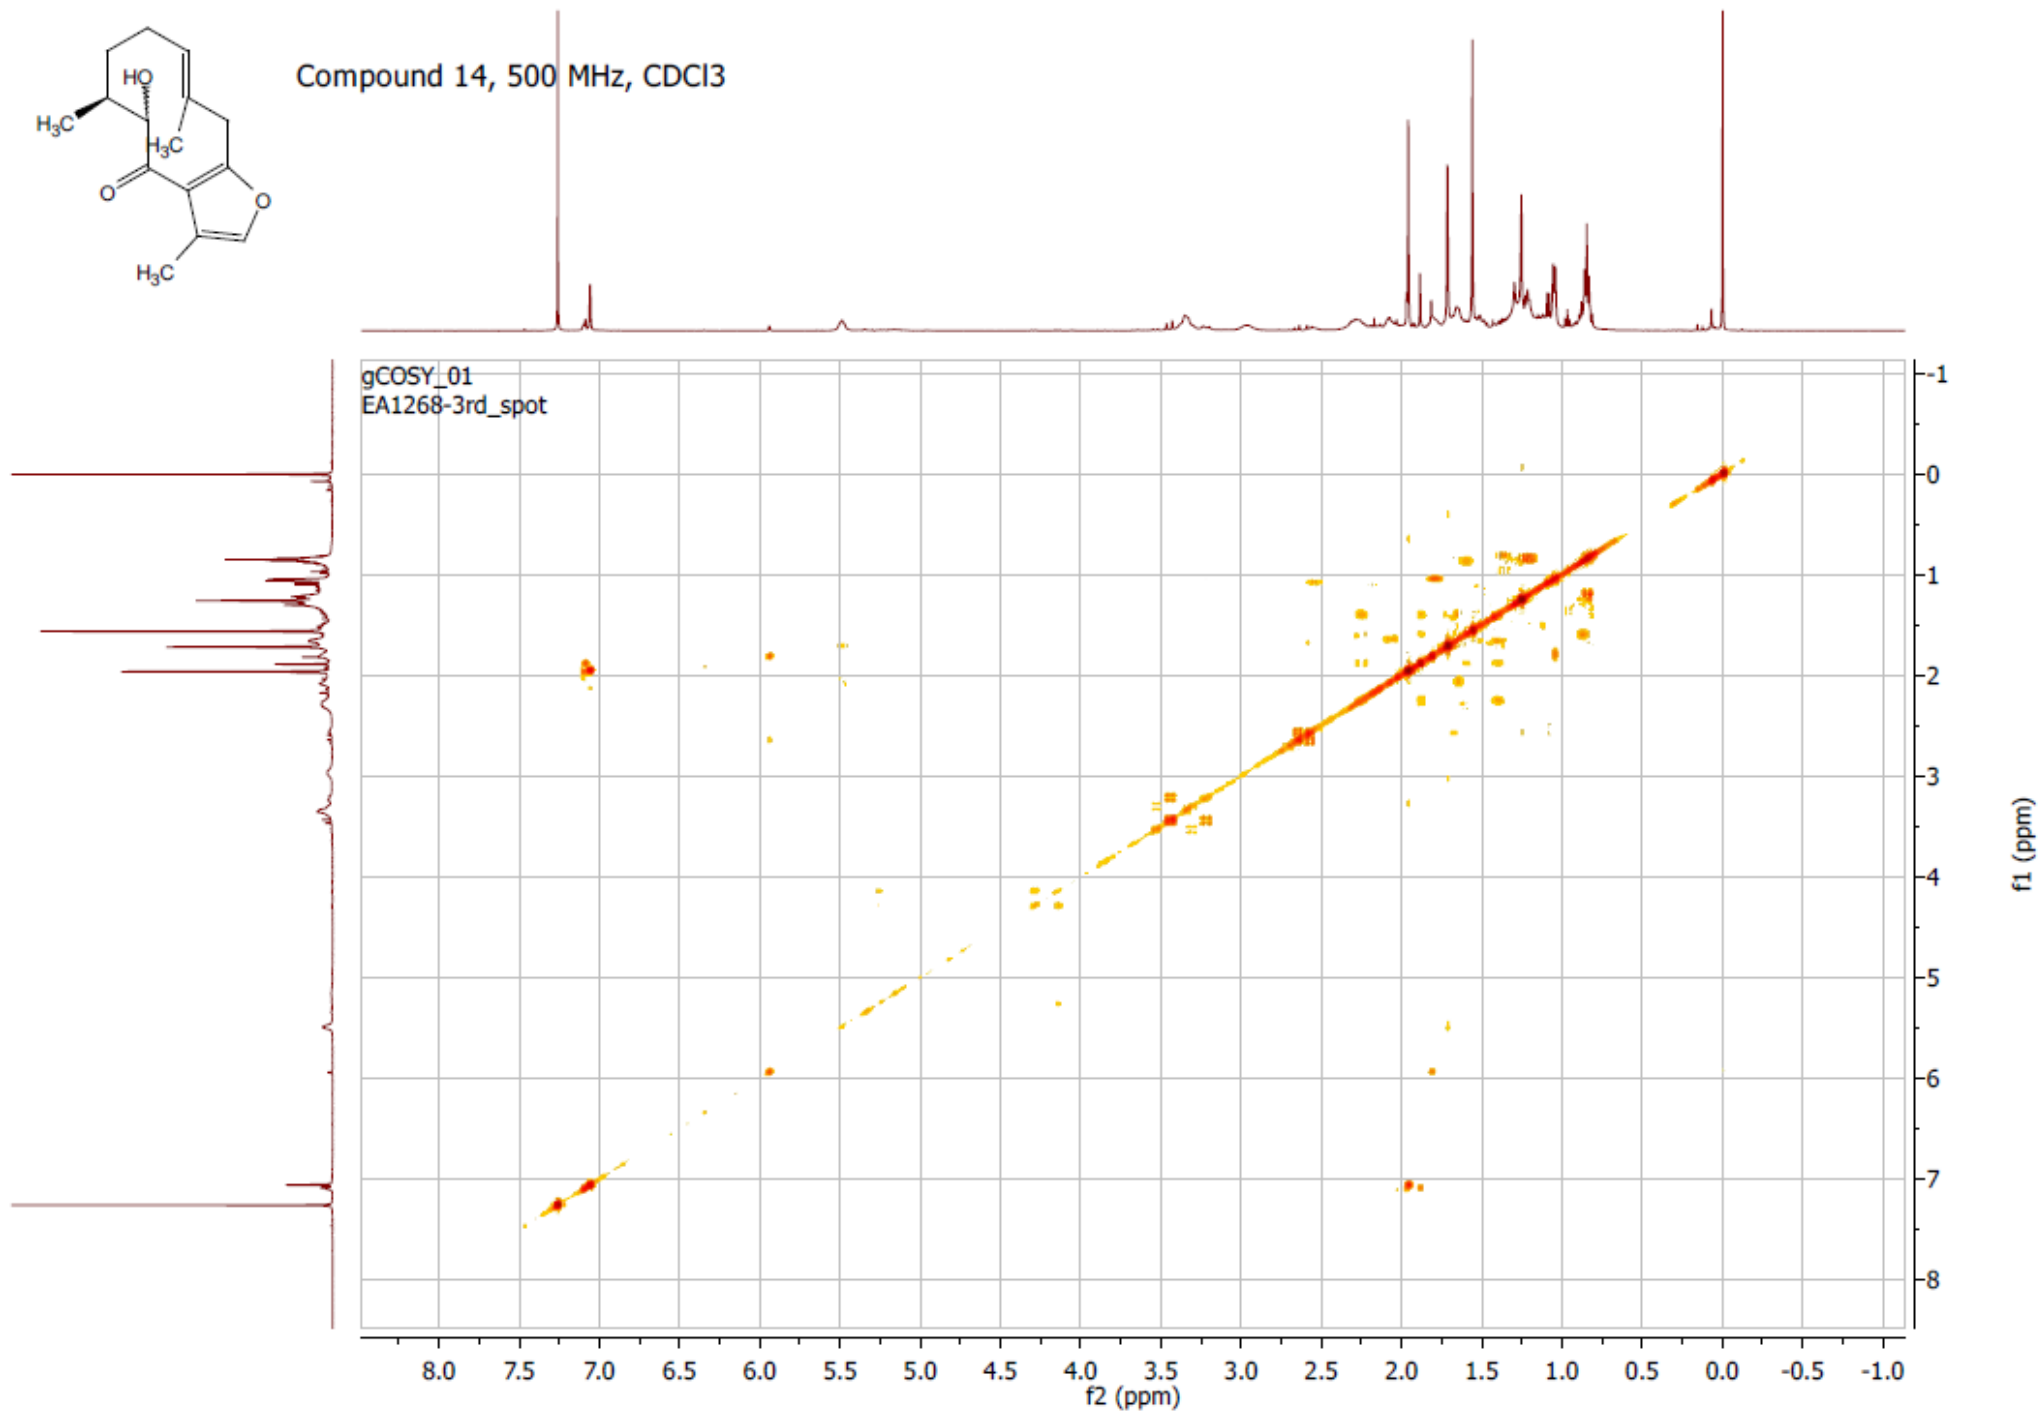

PROTON\_01  
EA1239-stili

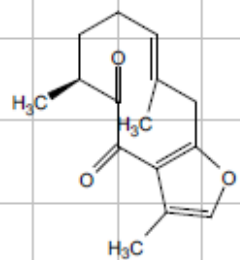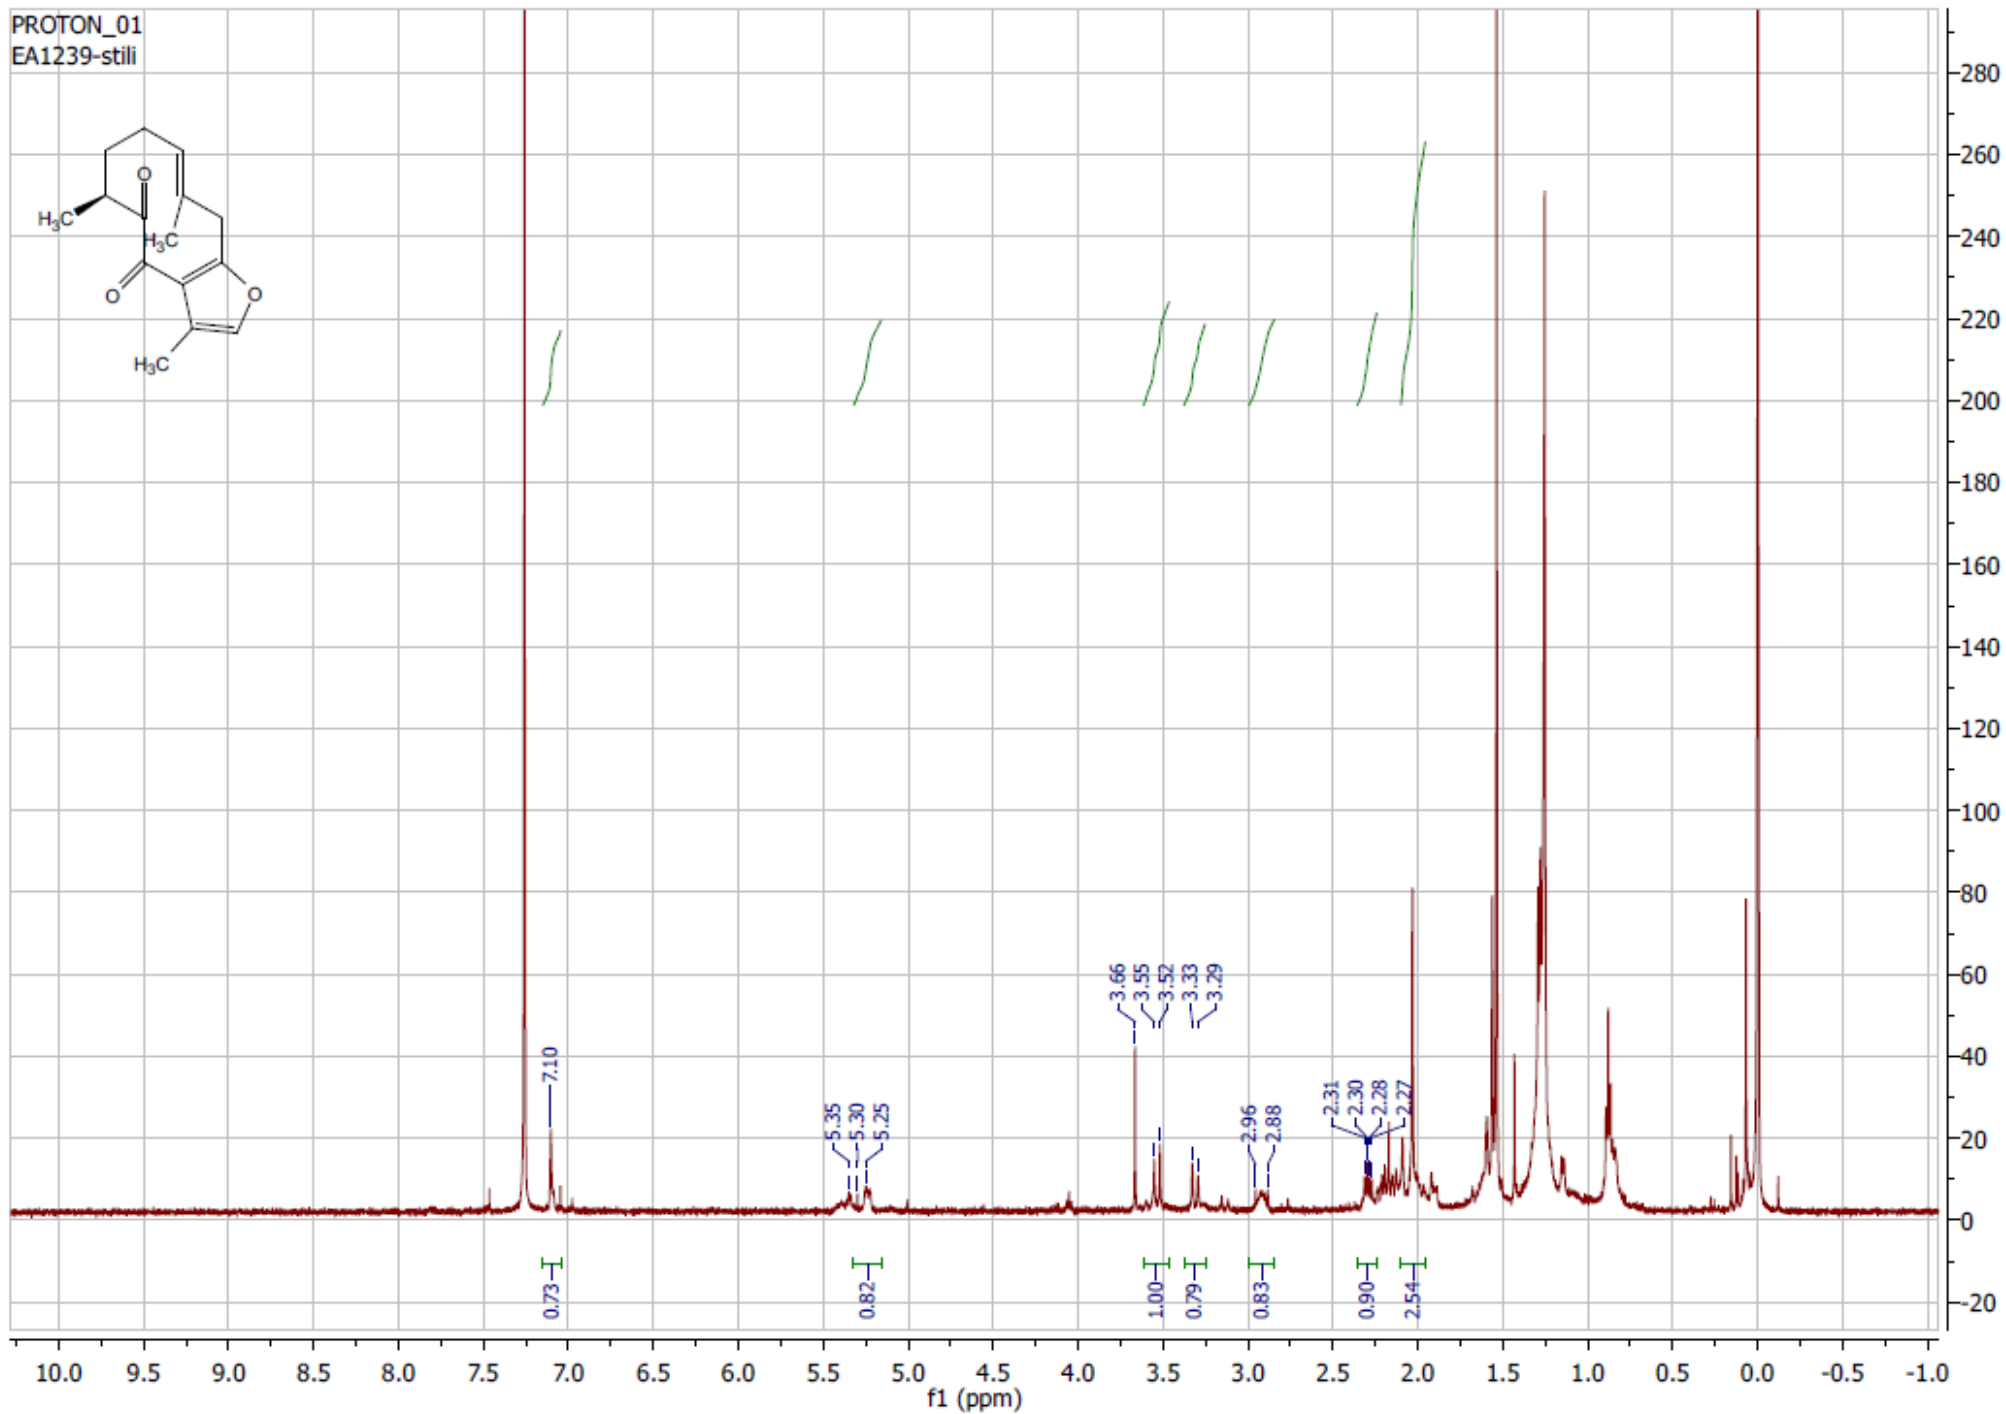

EA1303  
zedoarol

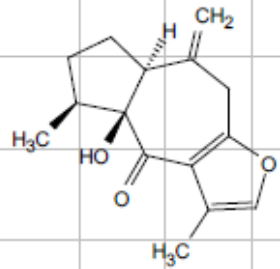

Zedoarol (17), 500 MHz, CDCl<sub>3</sub>

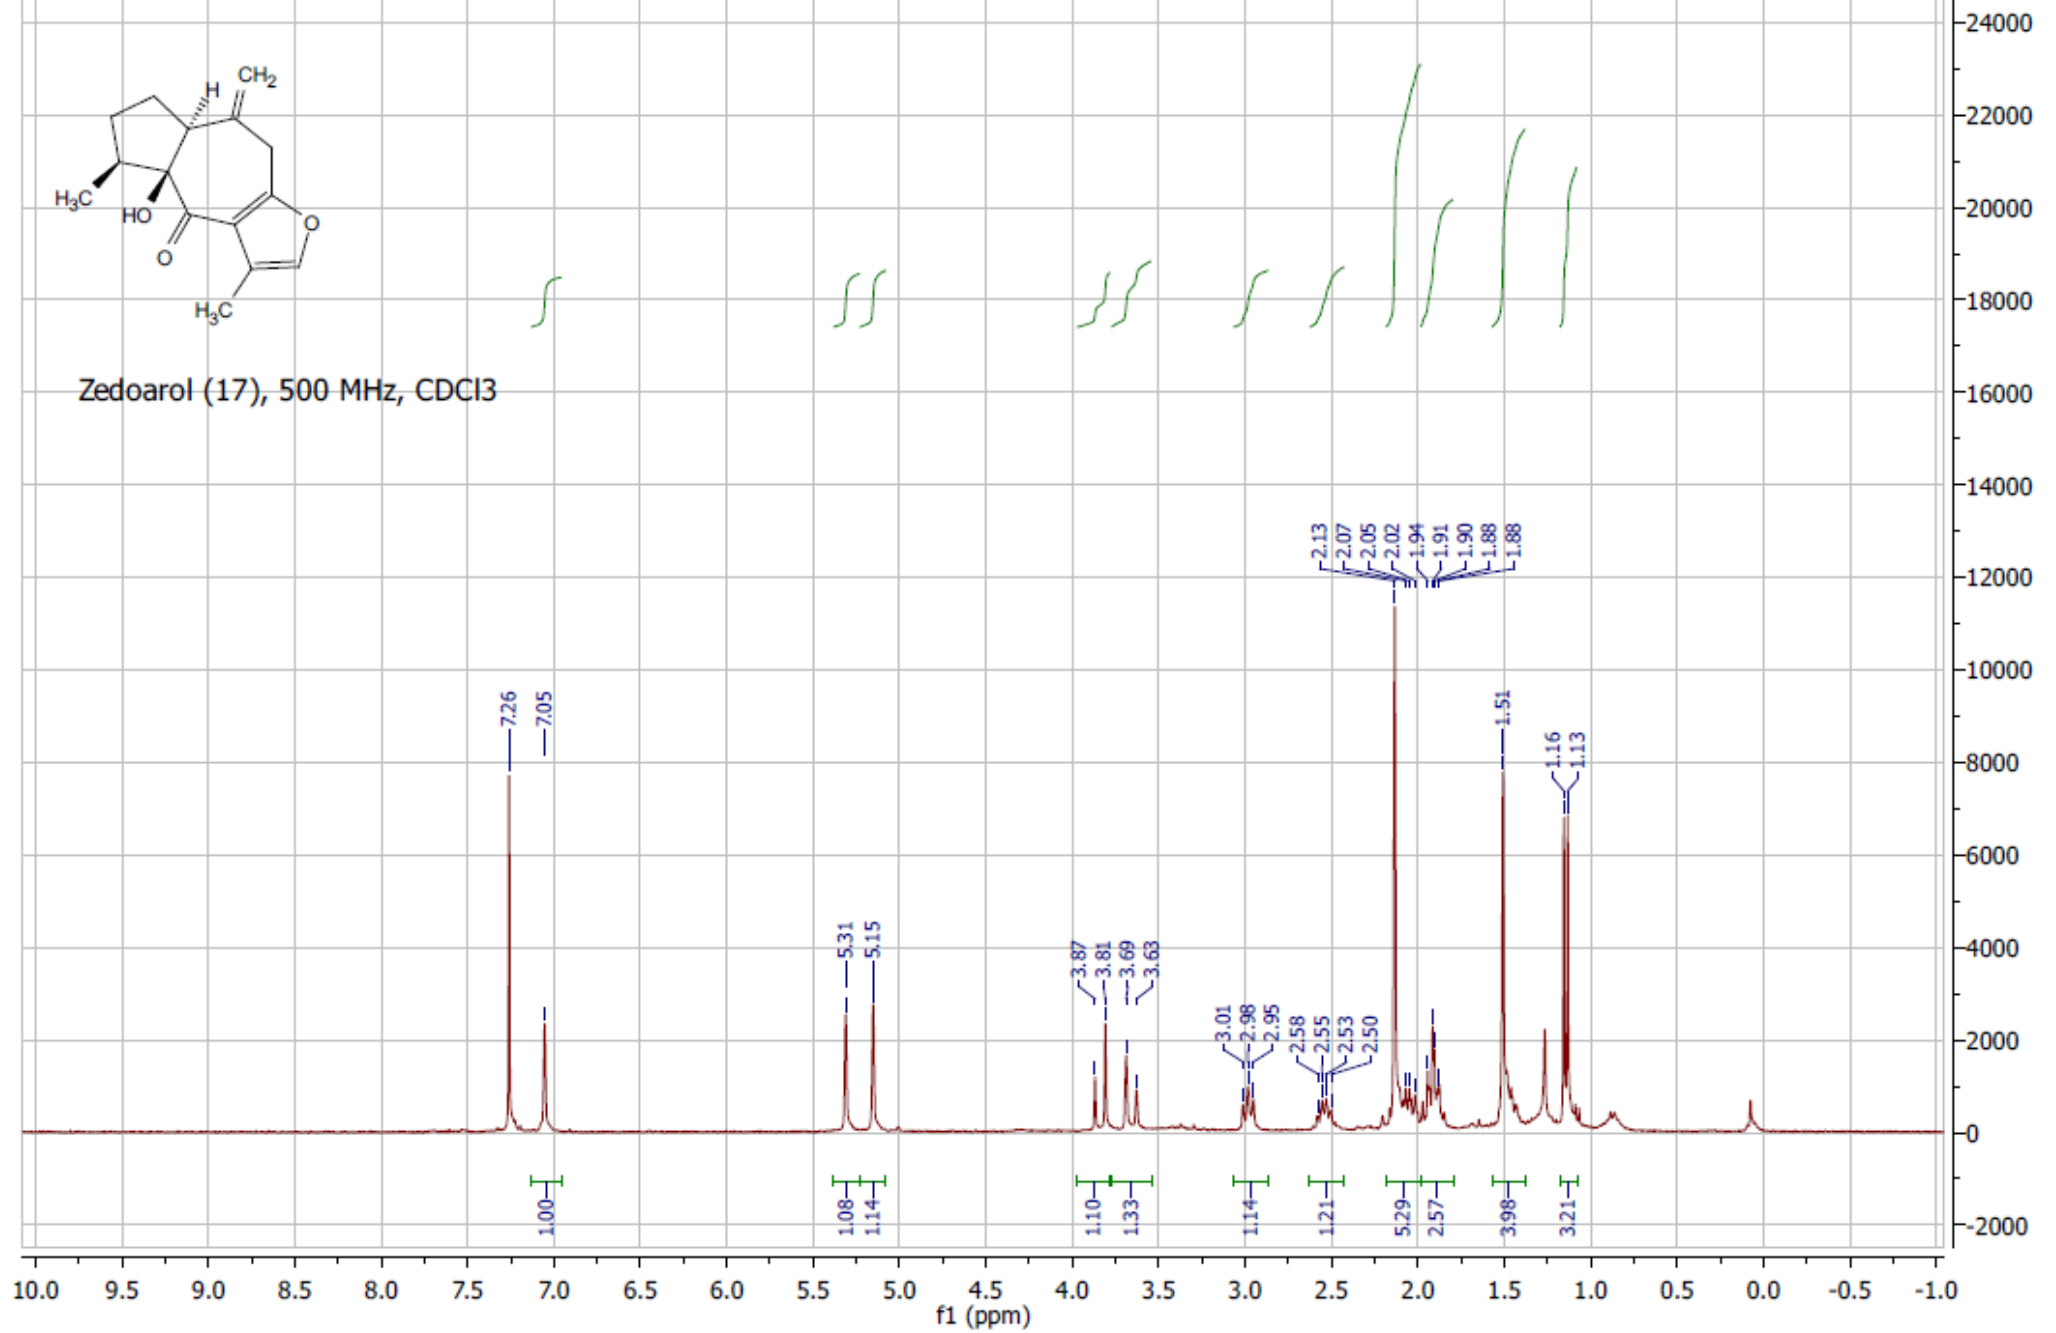

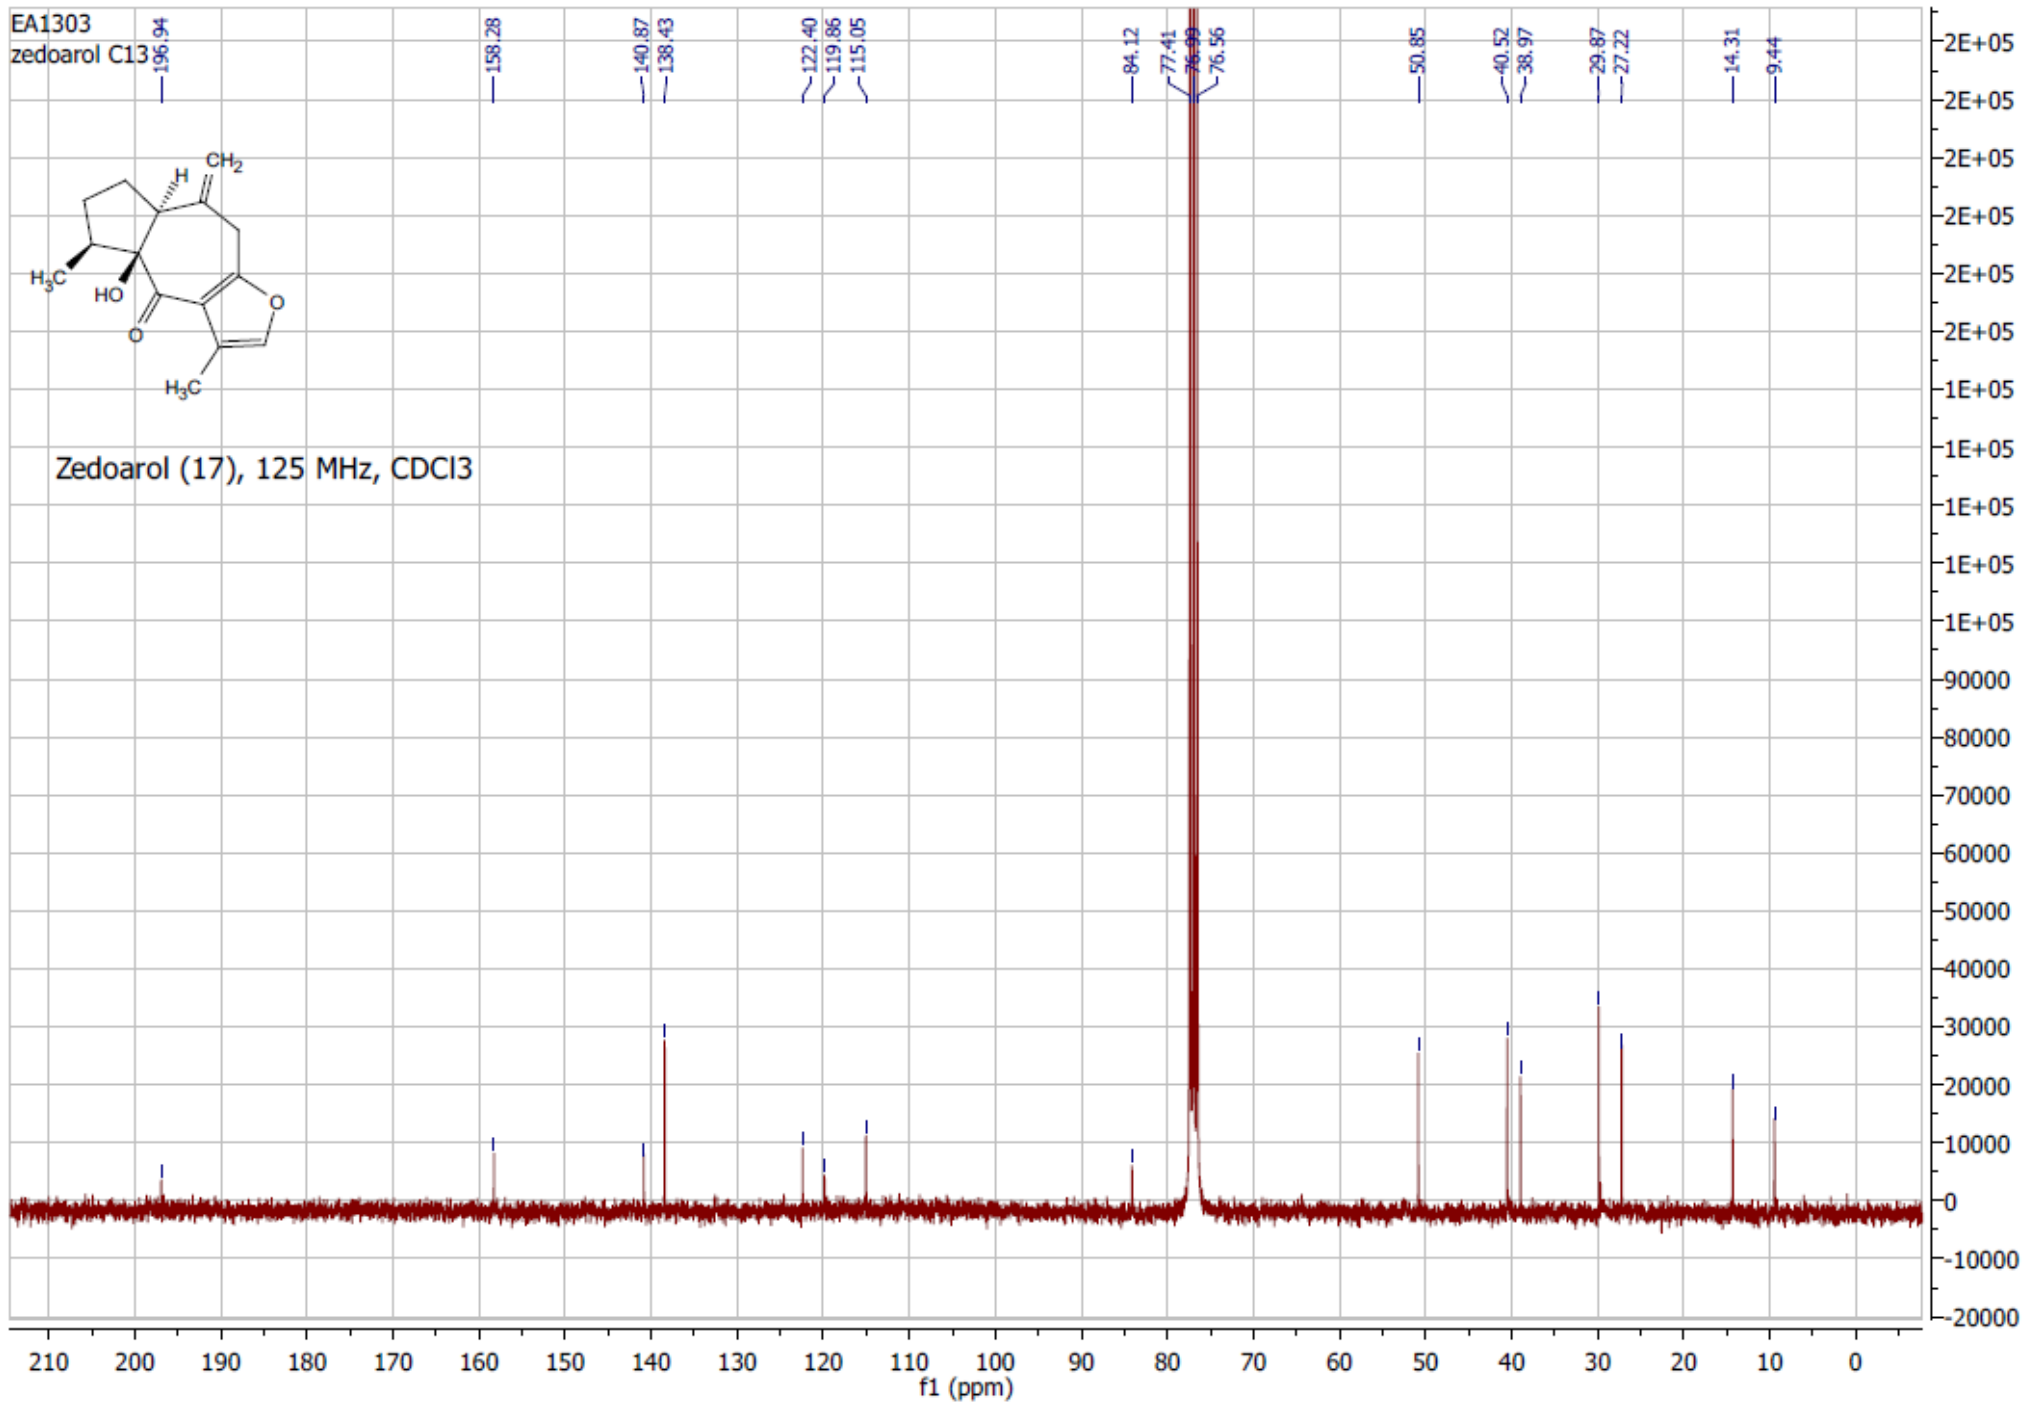

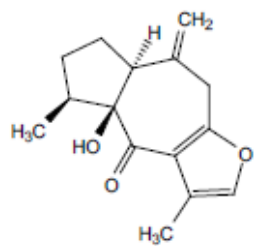

Zedoarol (17), 500 MHz, CDCl<sub>3</sub>

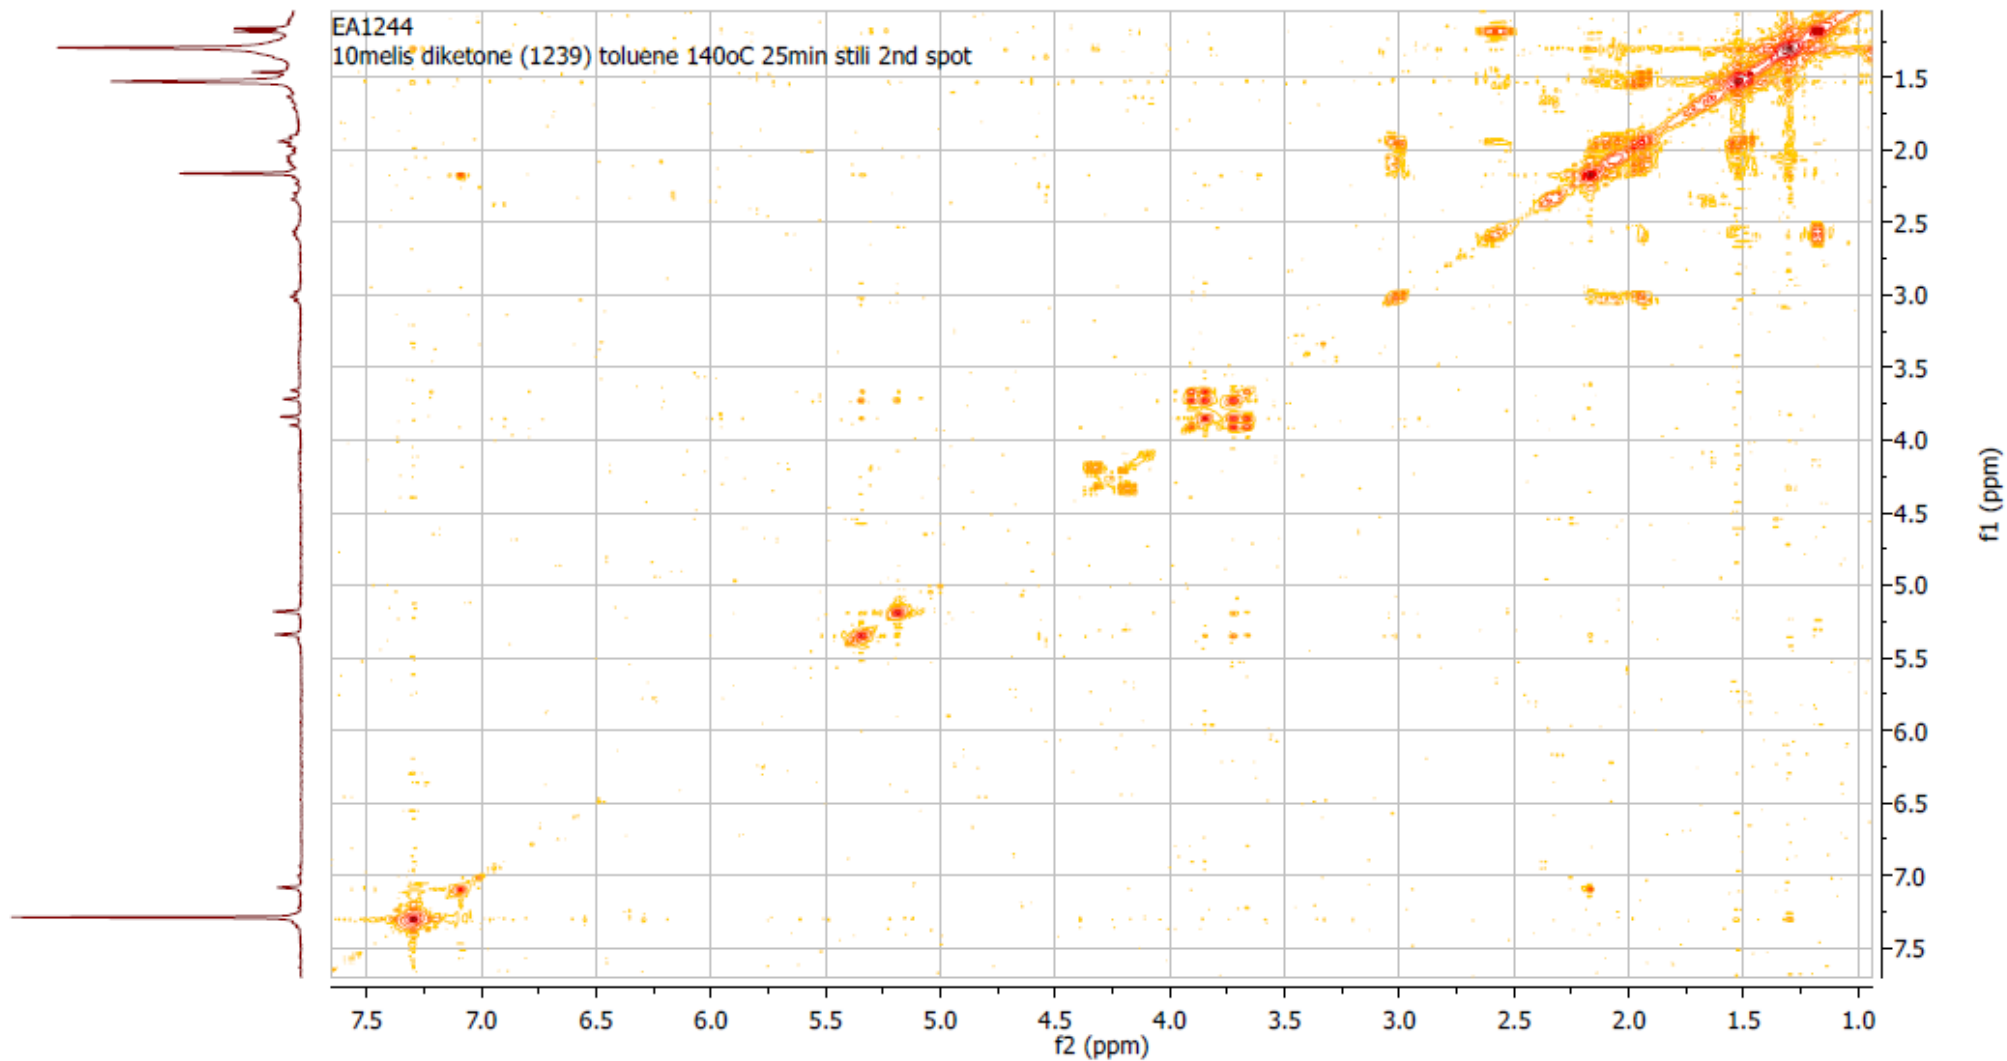



PROTON\_01  
EA1307-4TH\_SPOT\_NOESY

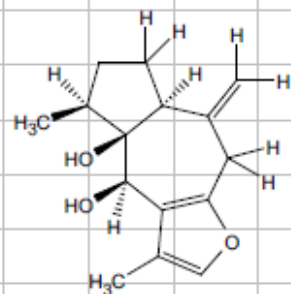

Compound 16, 500 MHz, CDCl3

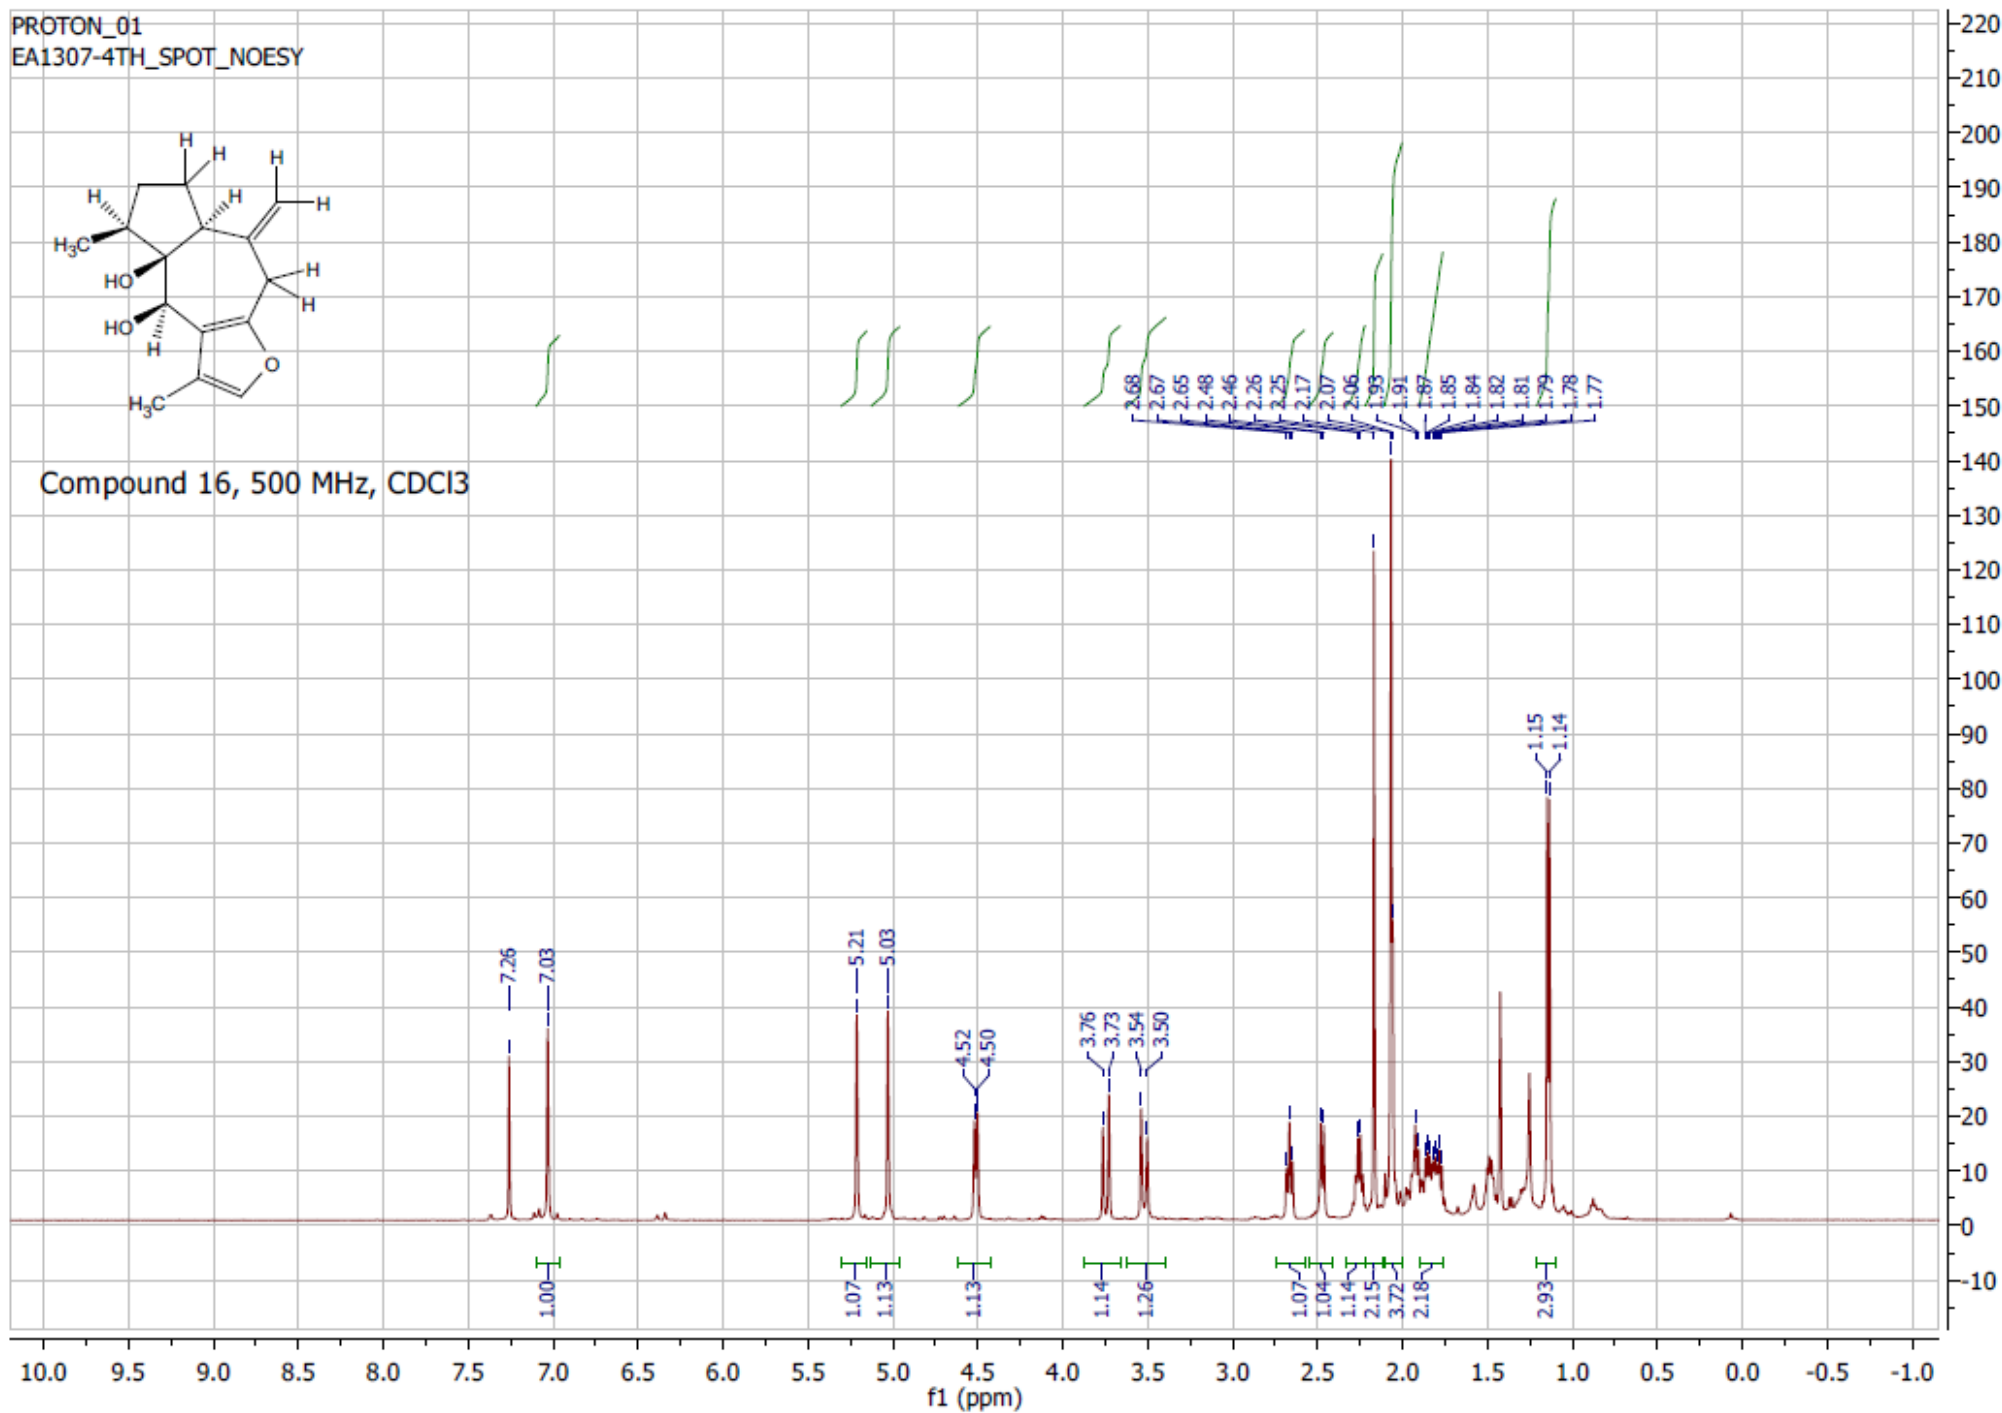

EA1307

10melis keto-OH furan 140C toluene 4th spot

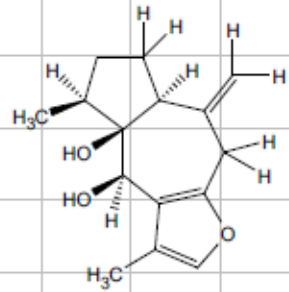

Compound 16, 125 MHz, CDCl<sub>3</sub>

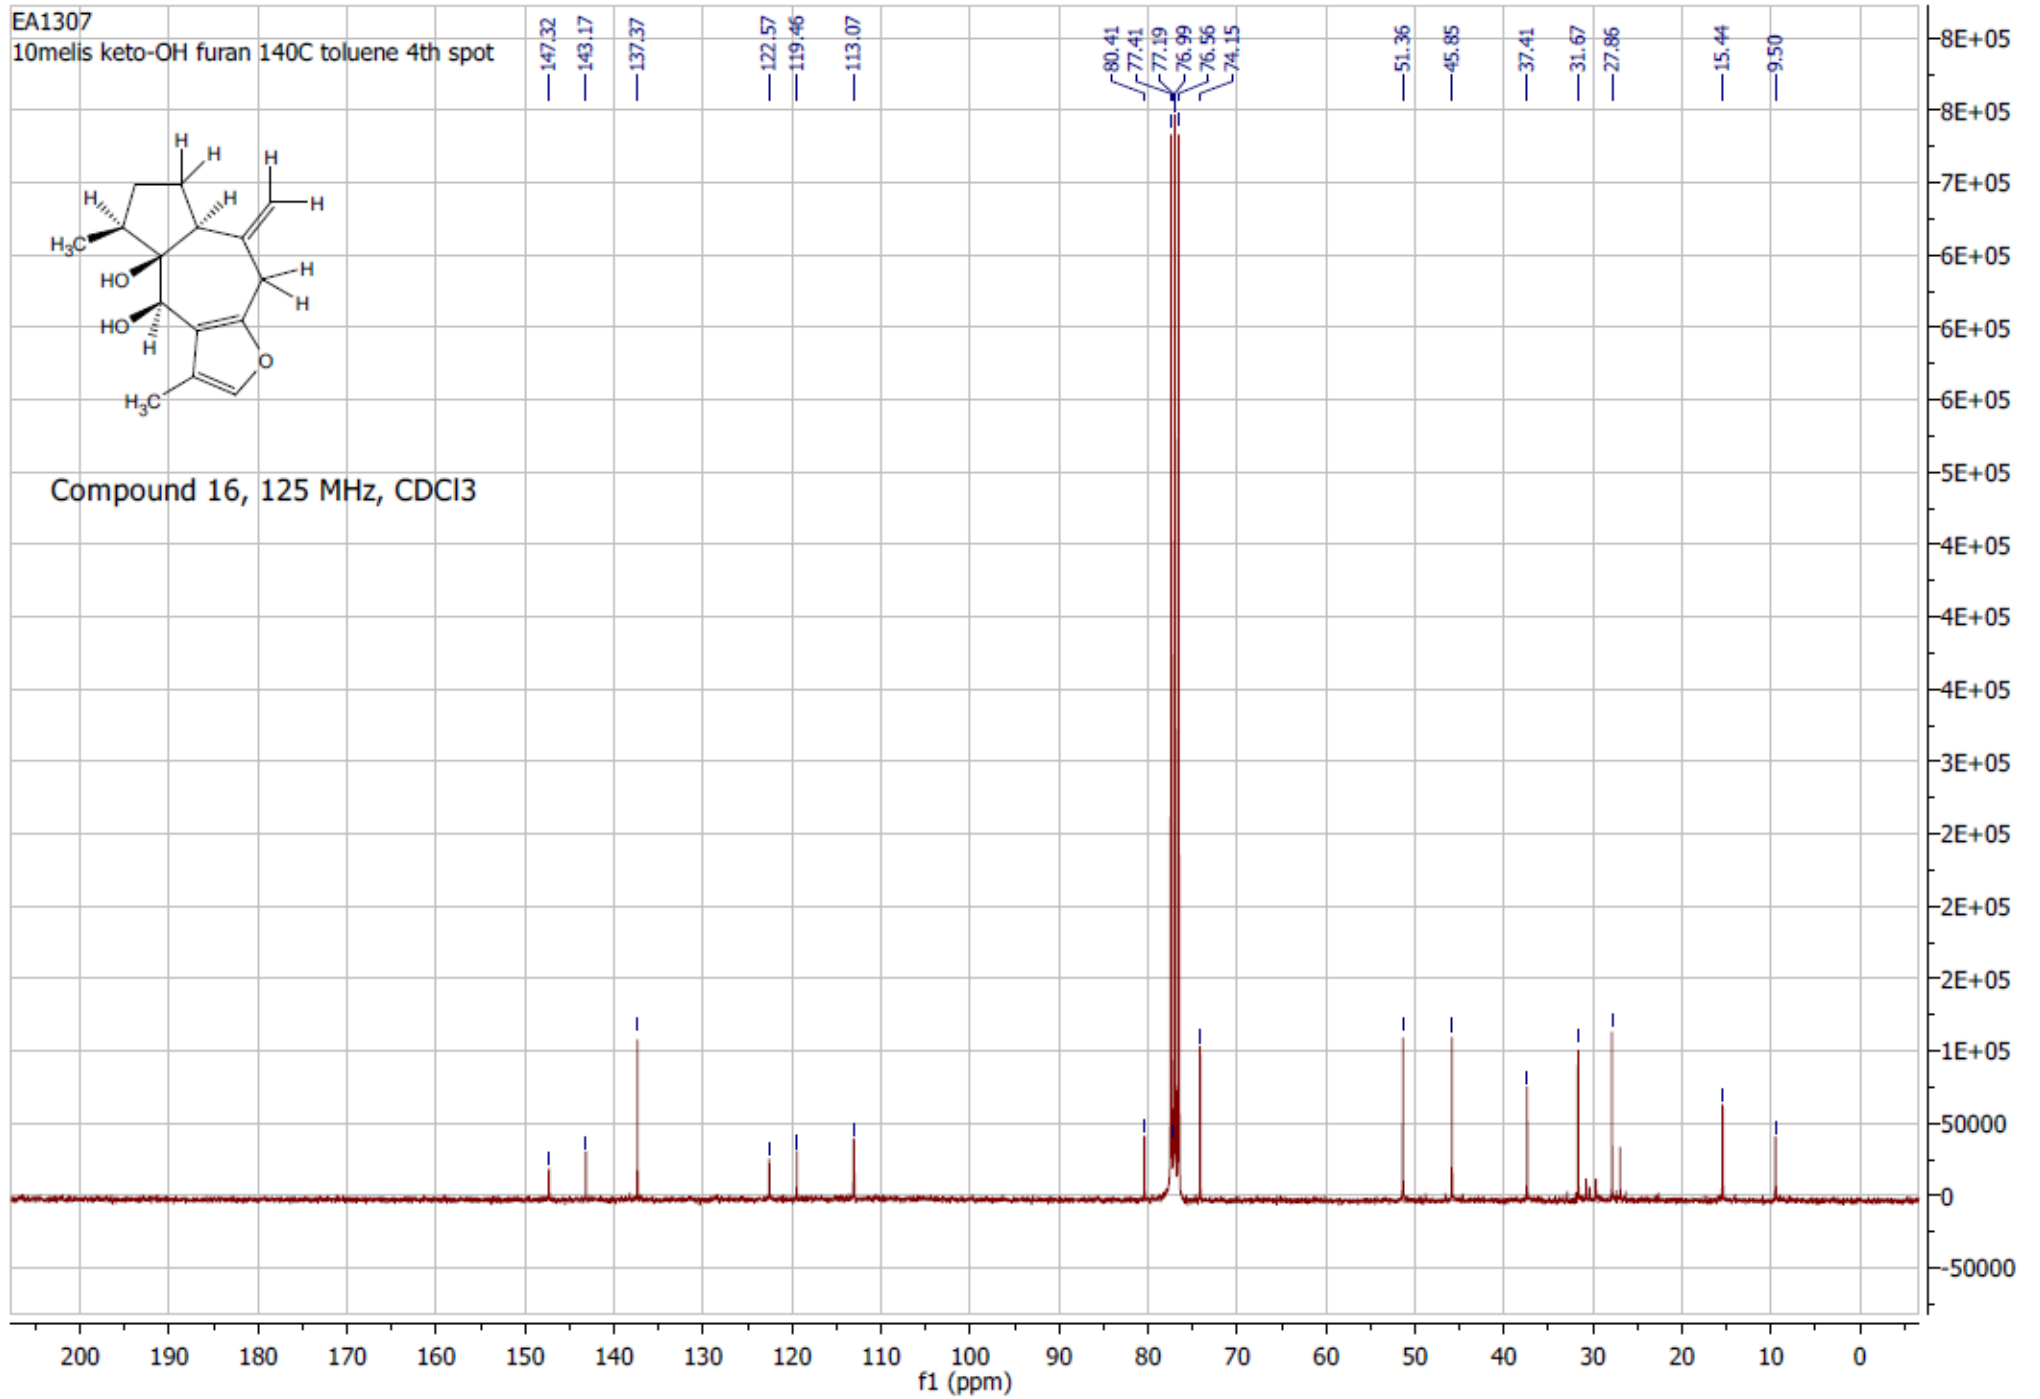

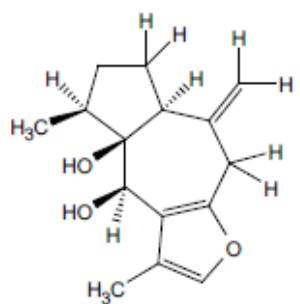

Compound 16, 500 MHz, CDCl<sub>3</sub>

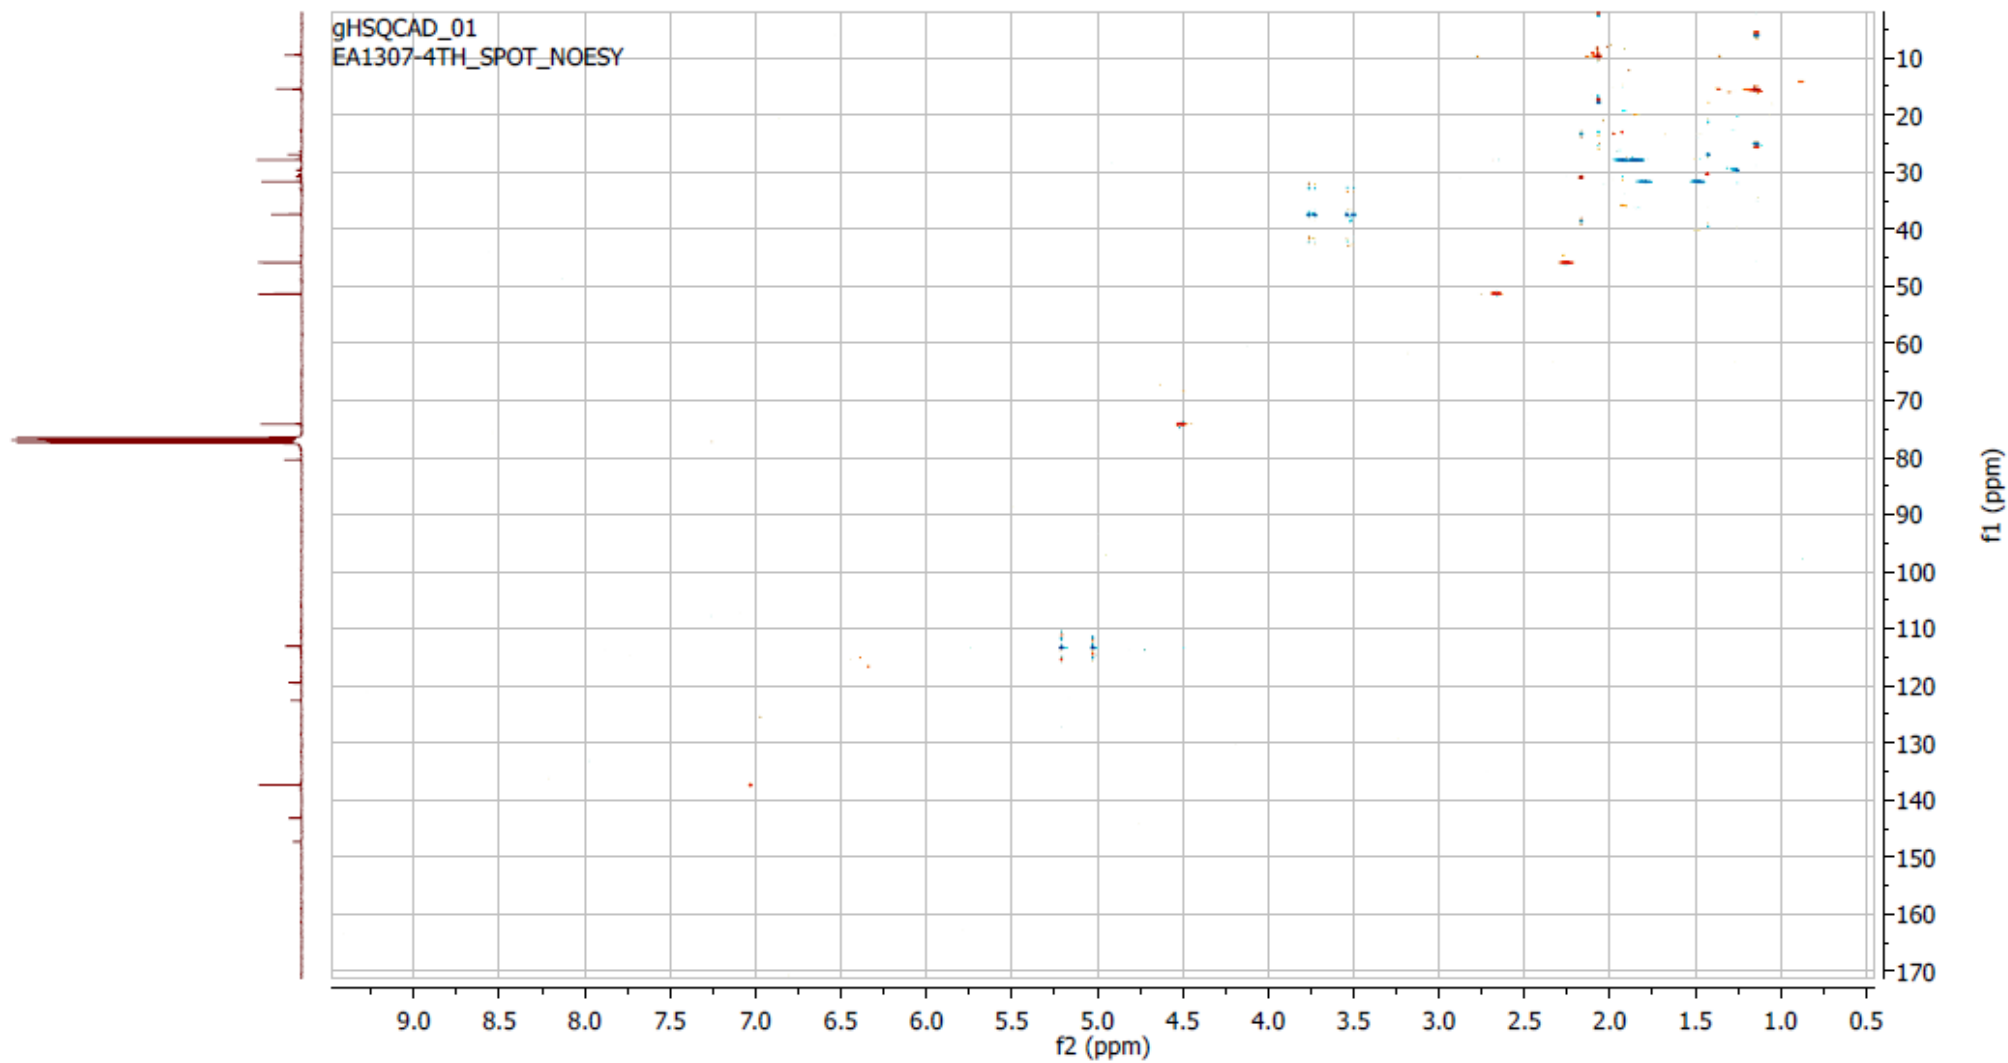

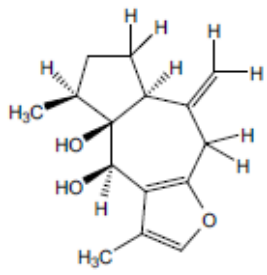

Compound 16, 500 MHz, CDCl<sub>3</sub>

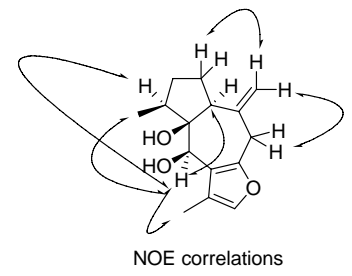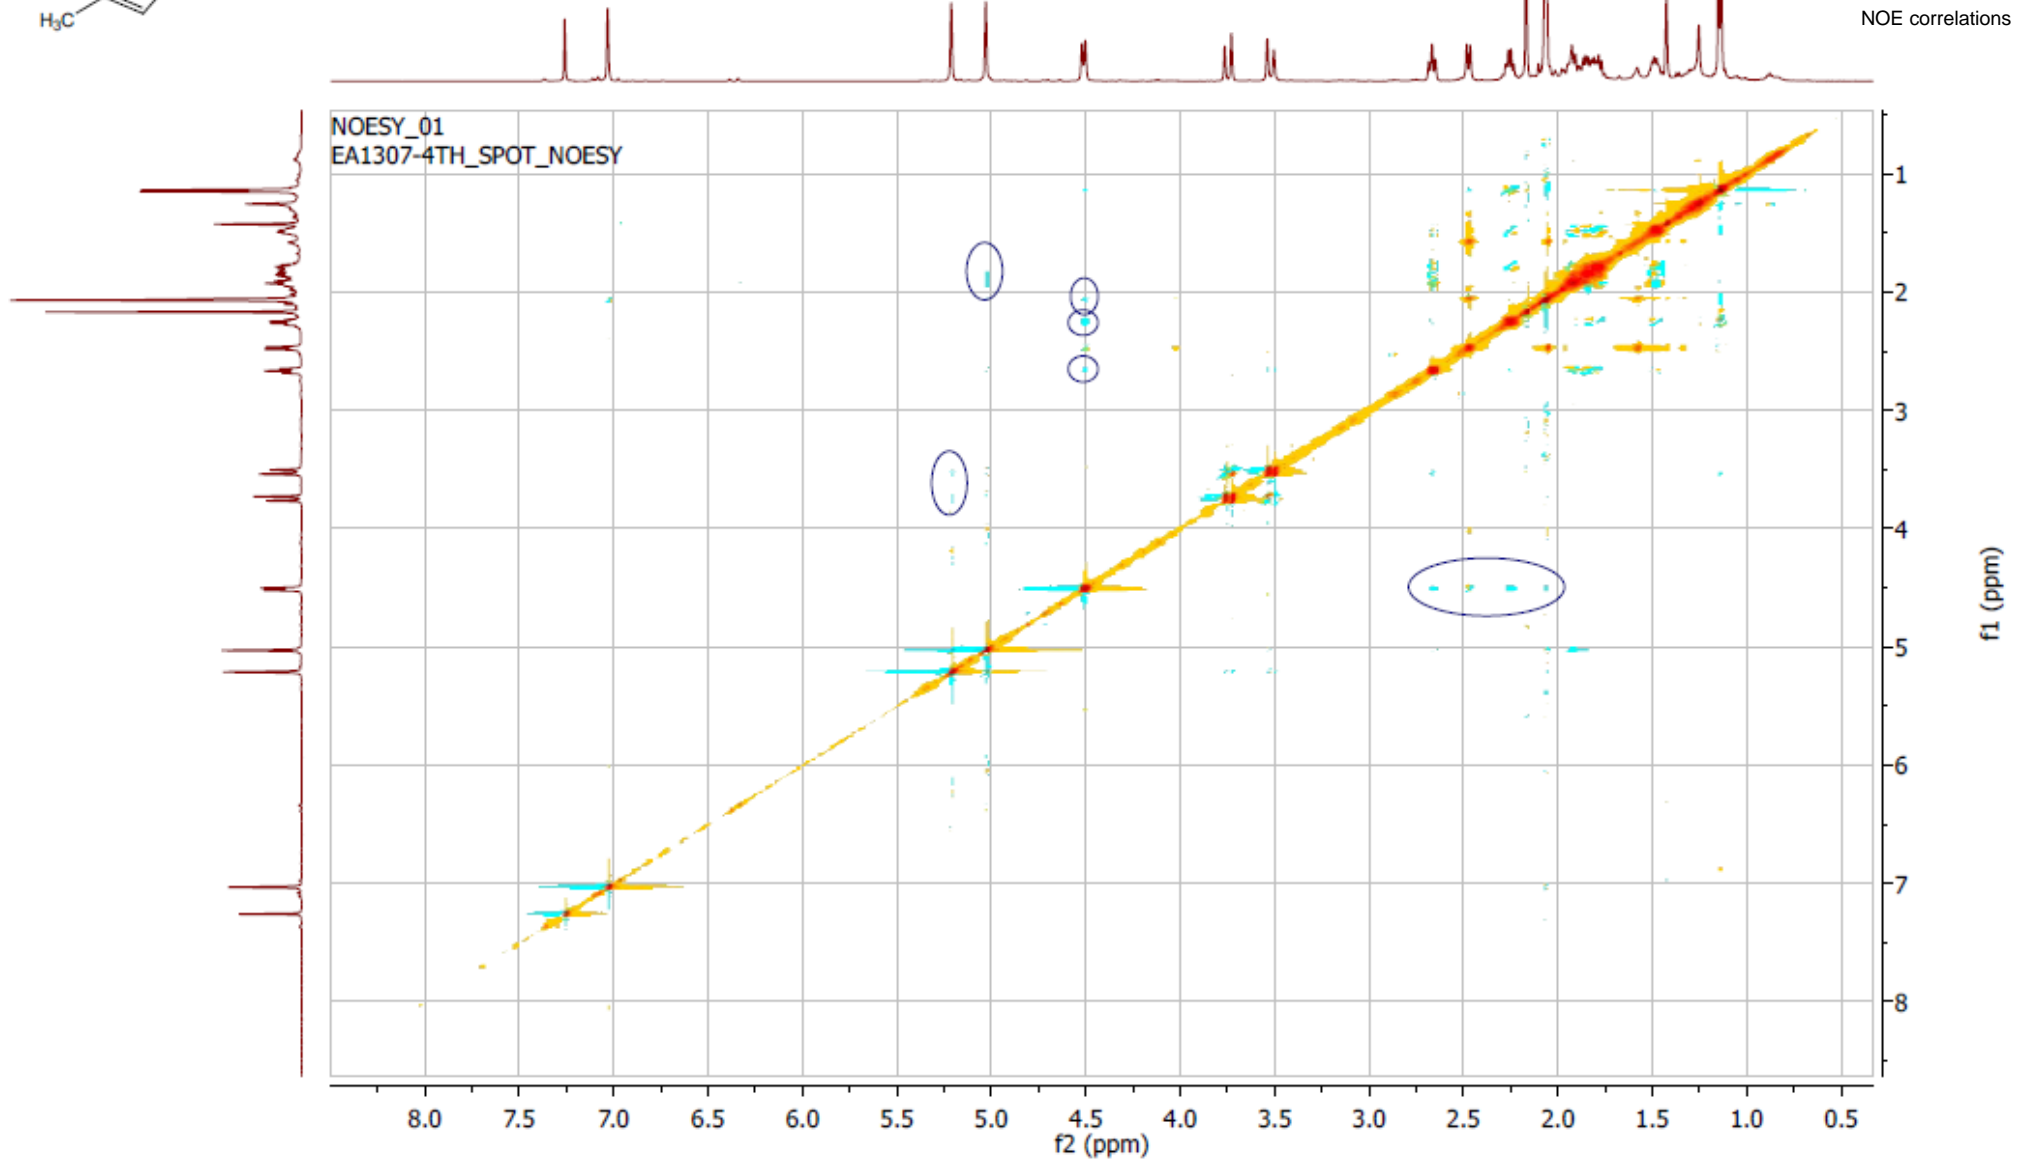

PROTON\_01  
EA1308-2\_for\_COSY

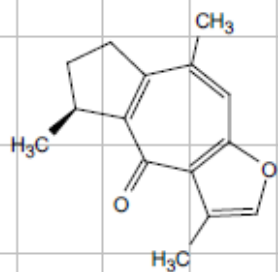

Compound 19, 500 MHz, CDCl<sub>3</sub>

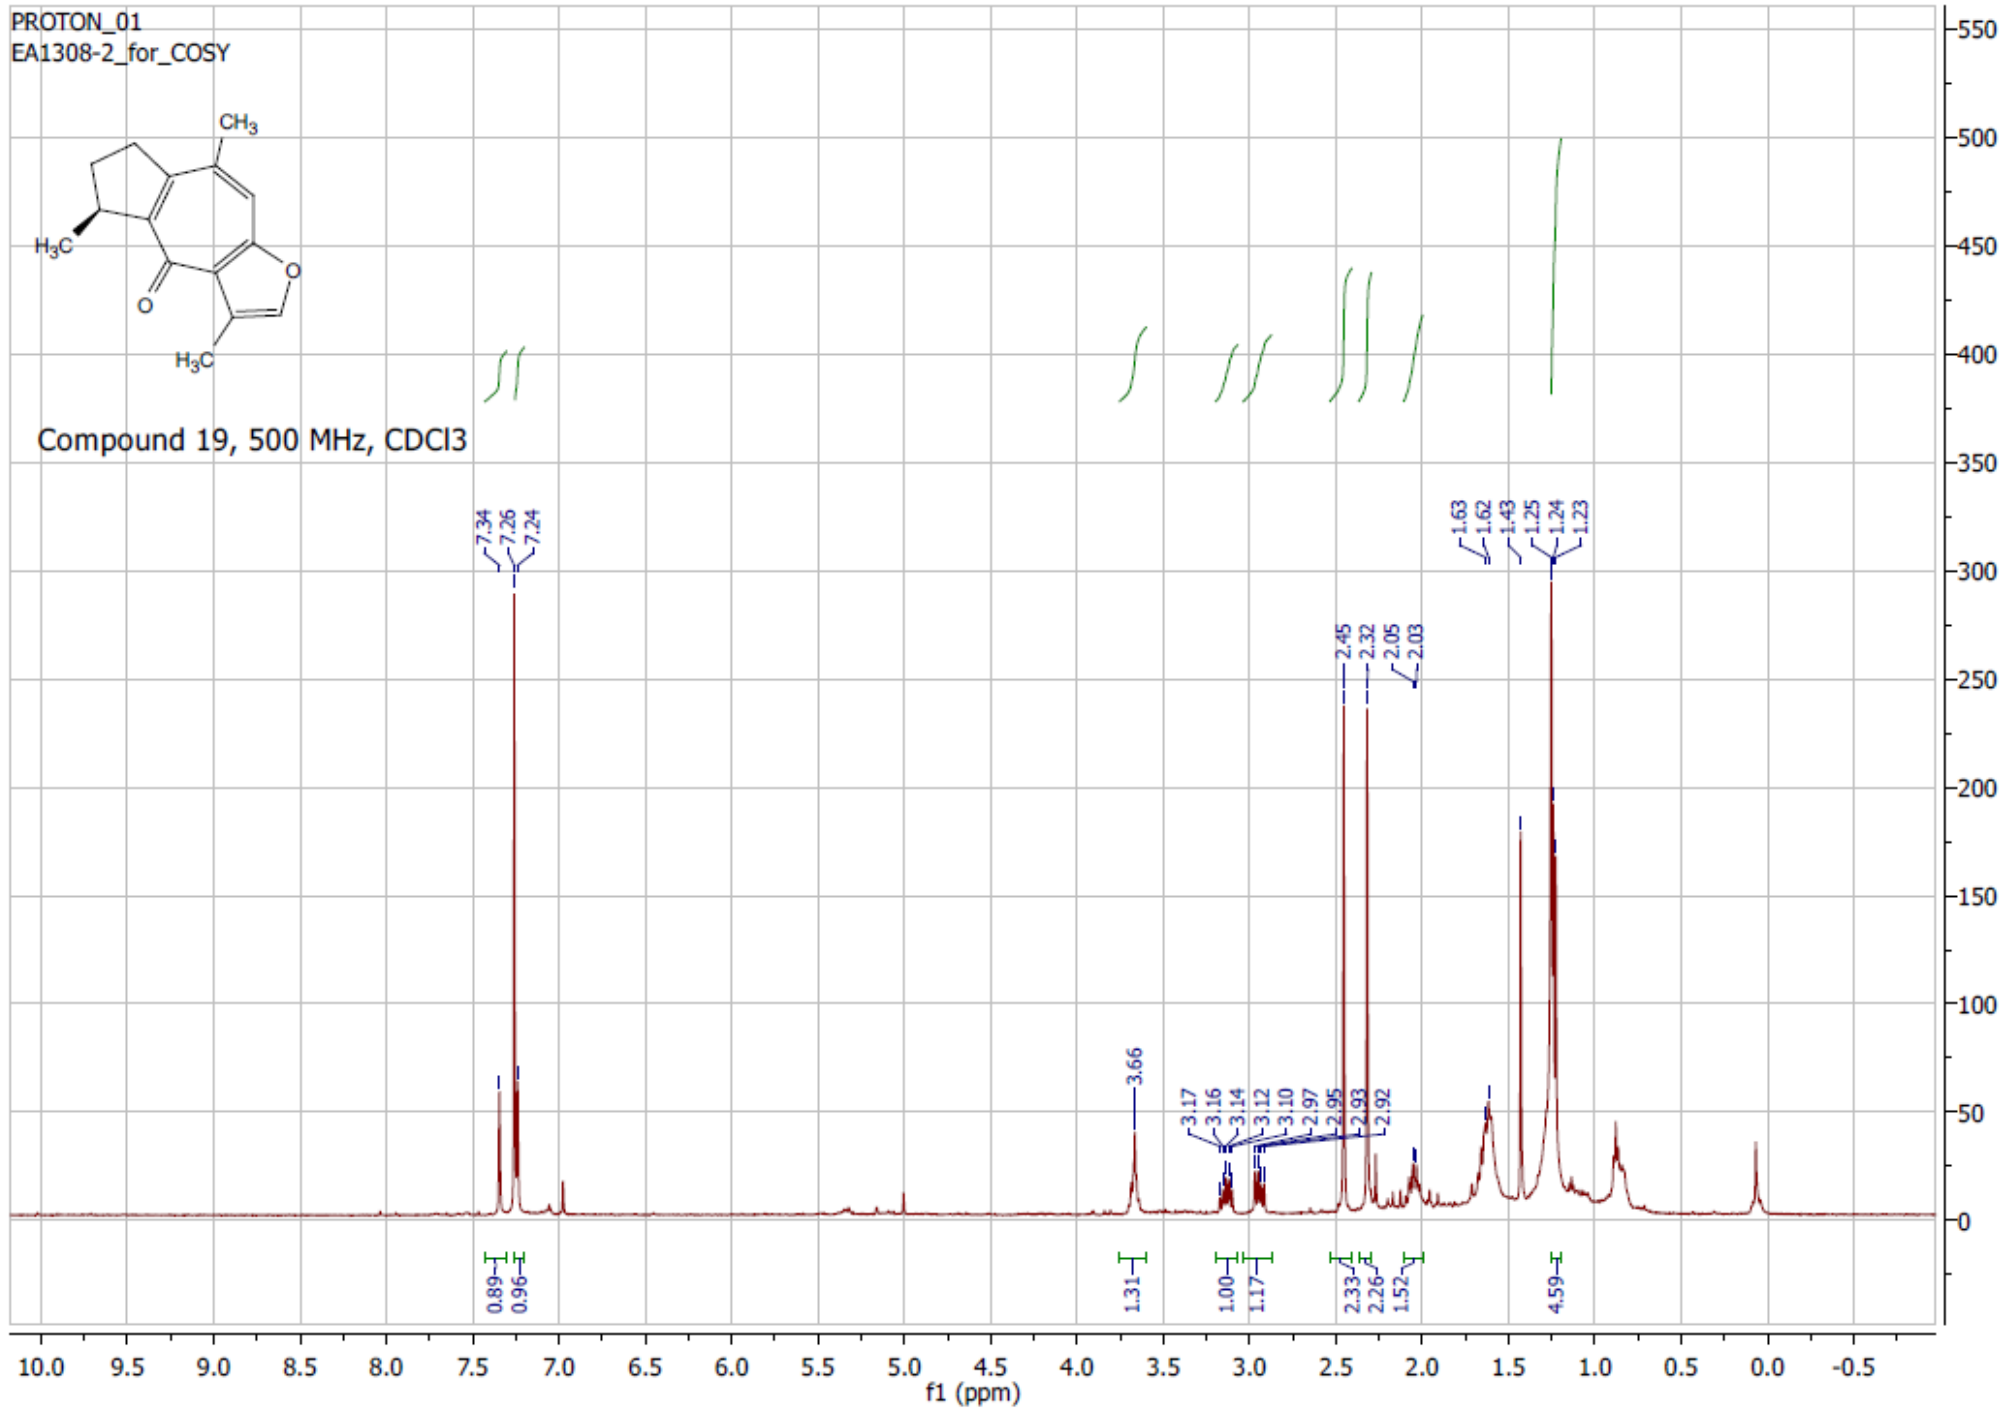



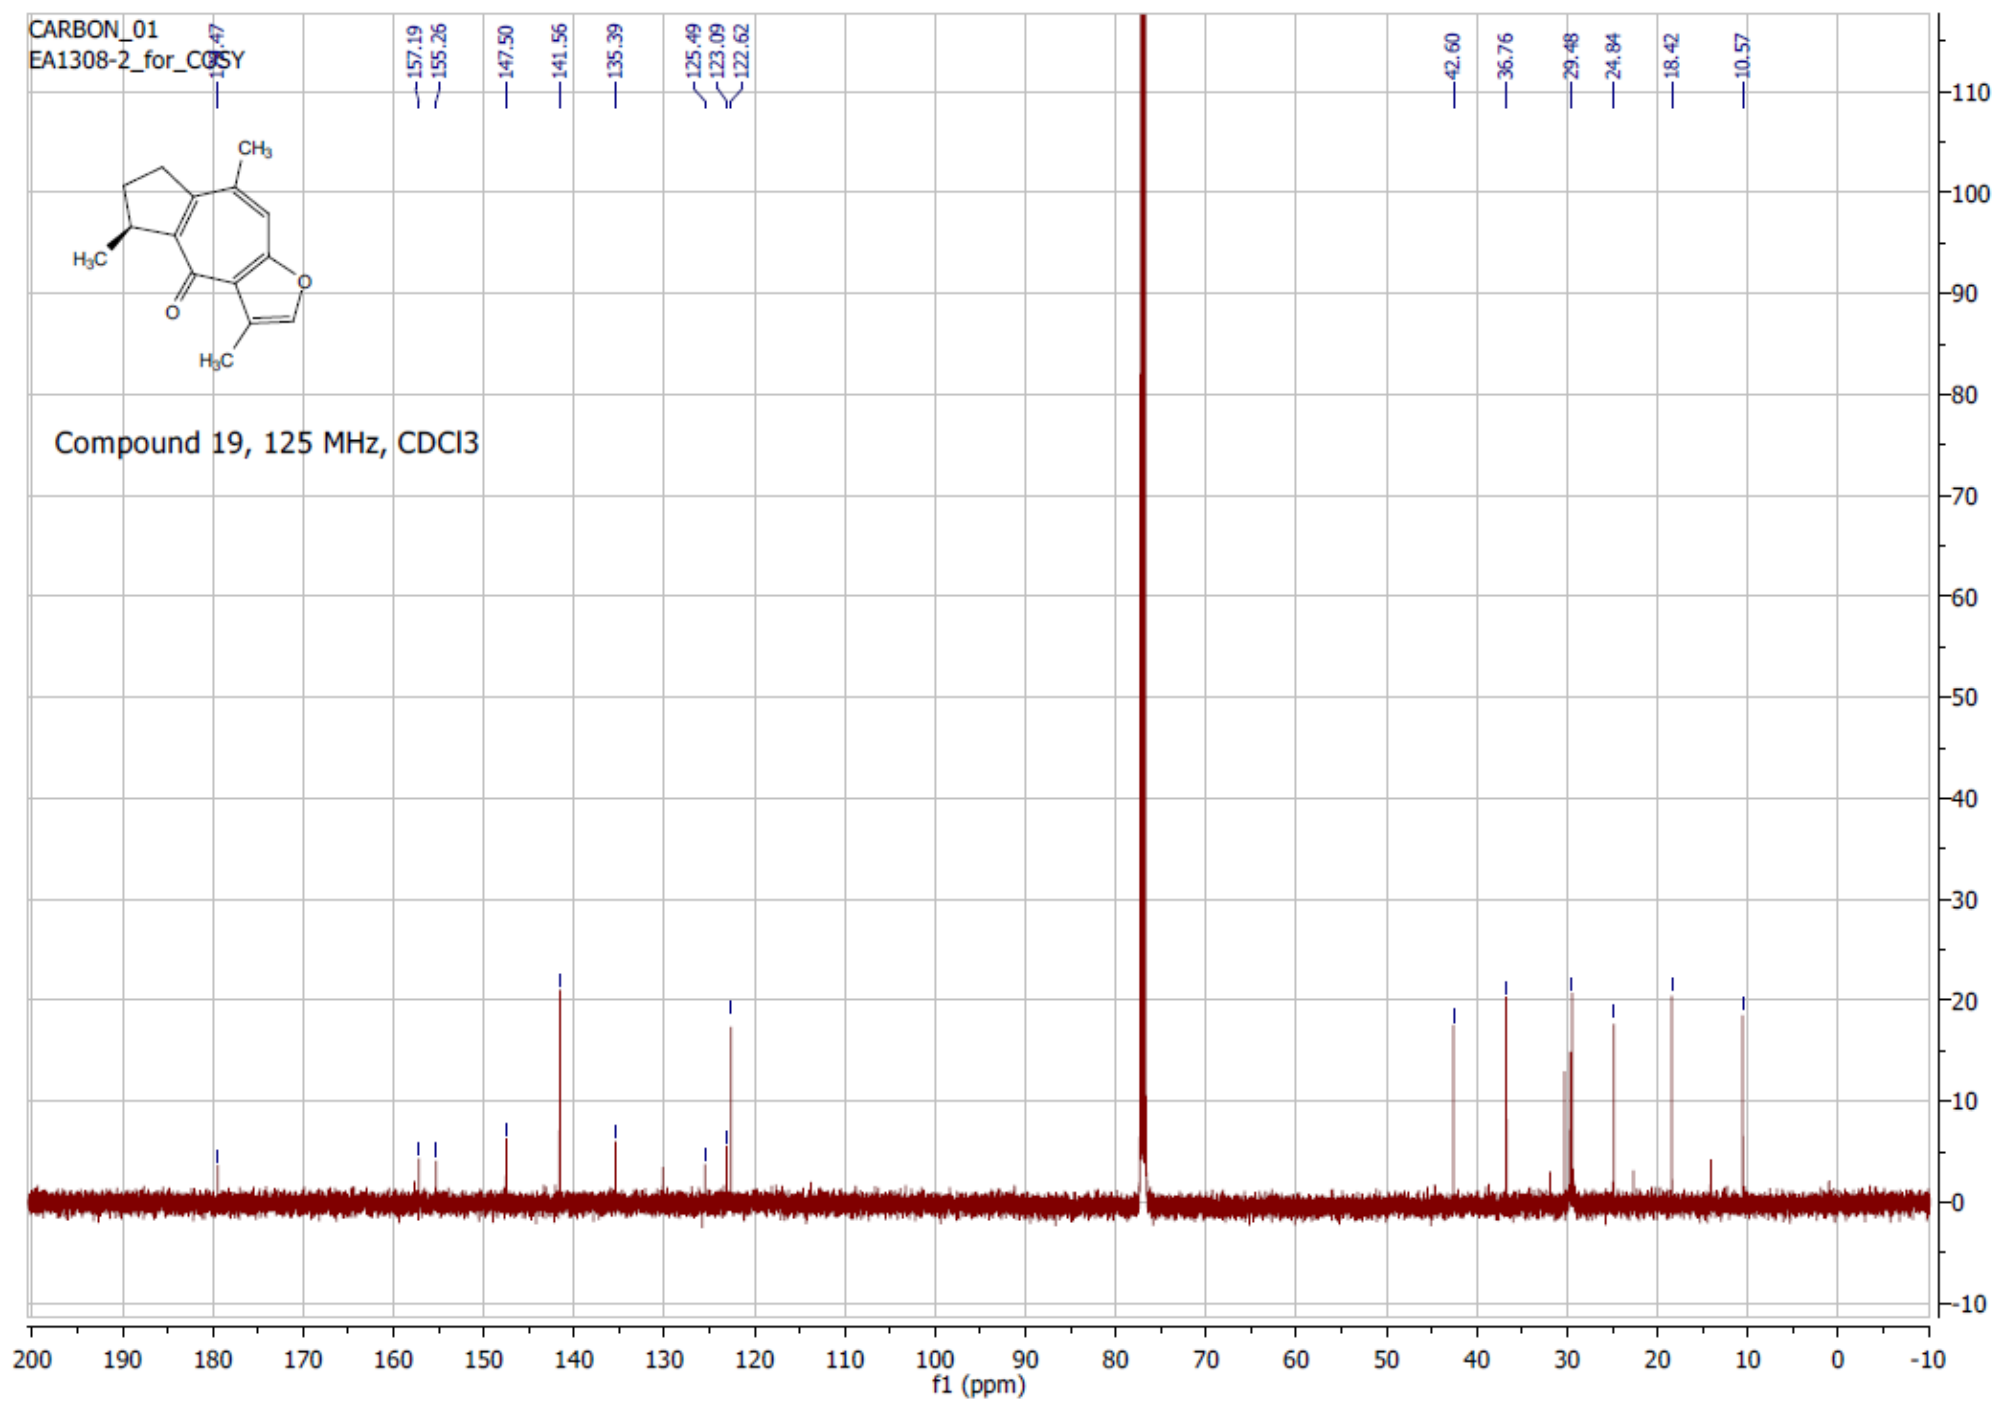

PROTON\_01  
VDS70\_3rd\_spot\_for\_NOESY

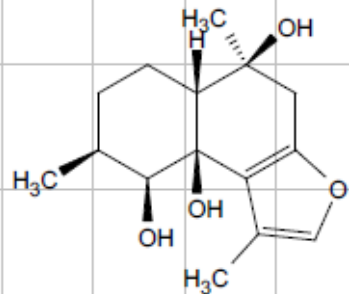

Compound 20, 500 MHz

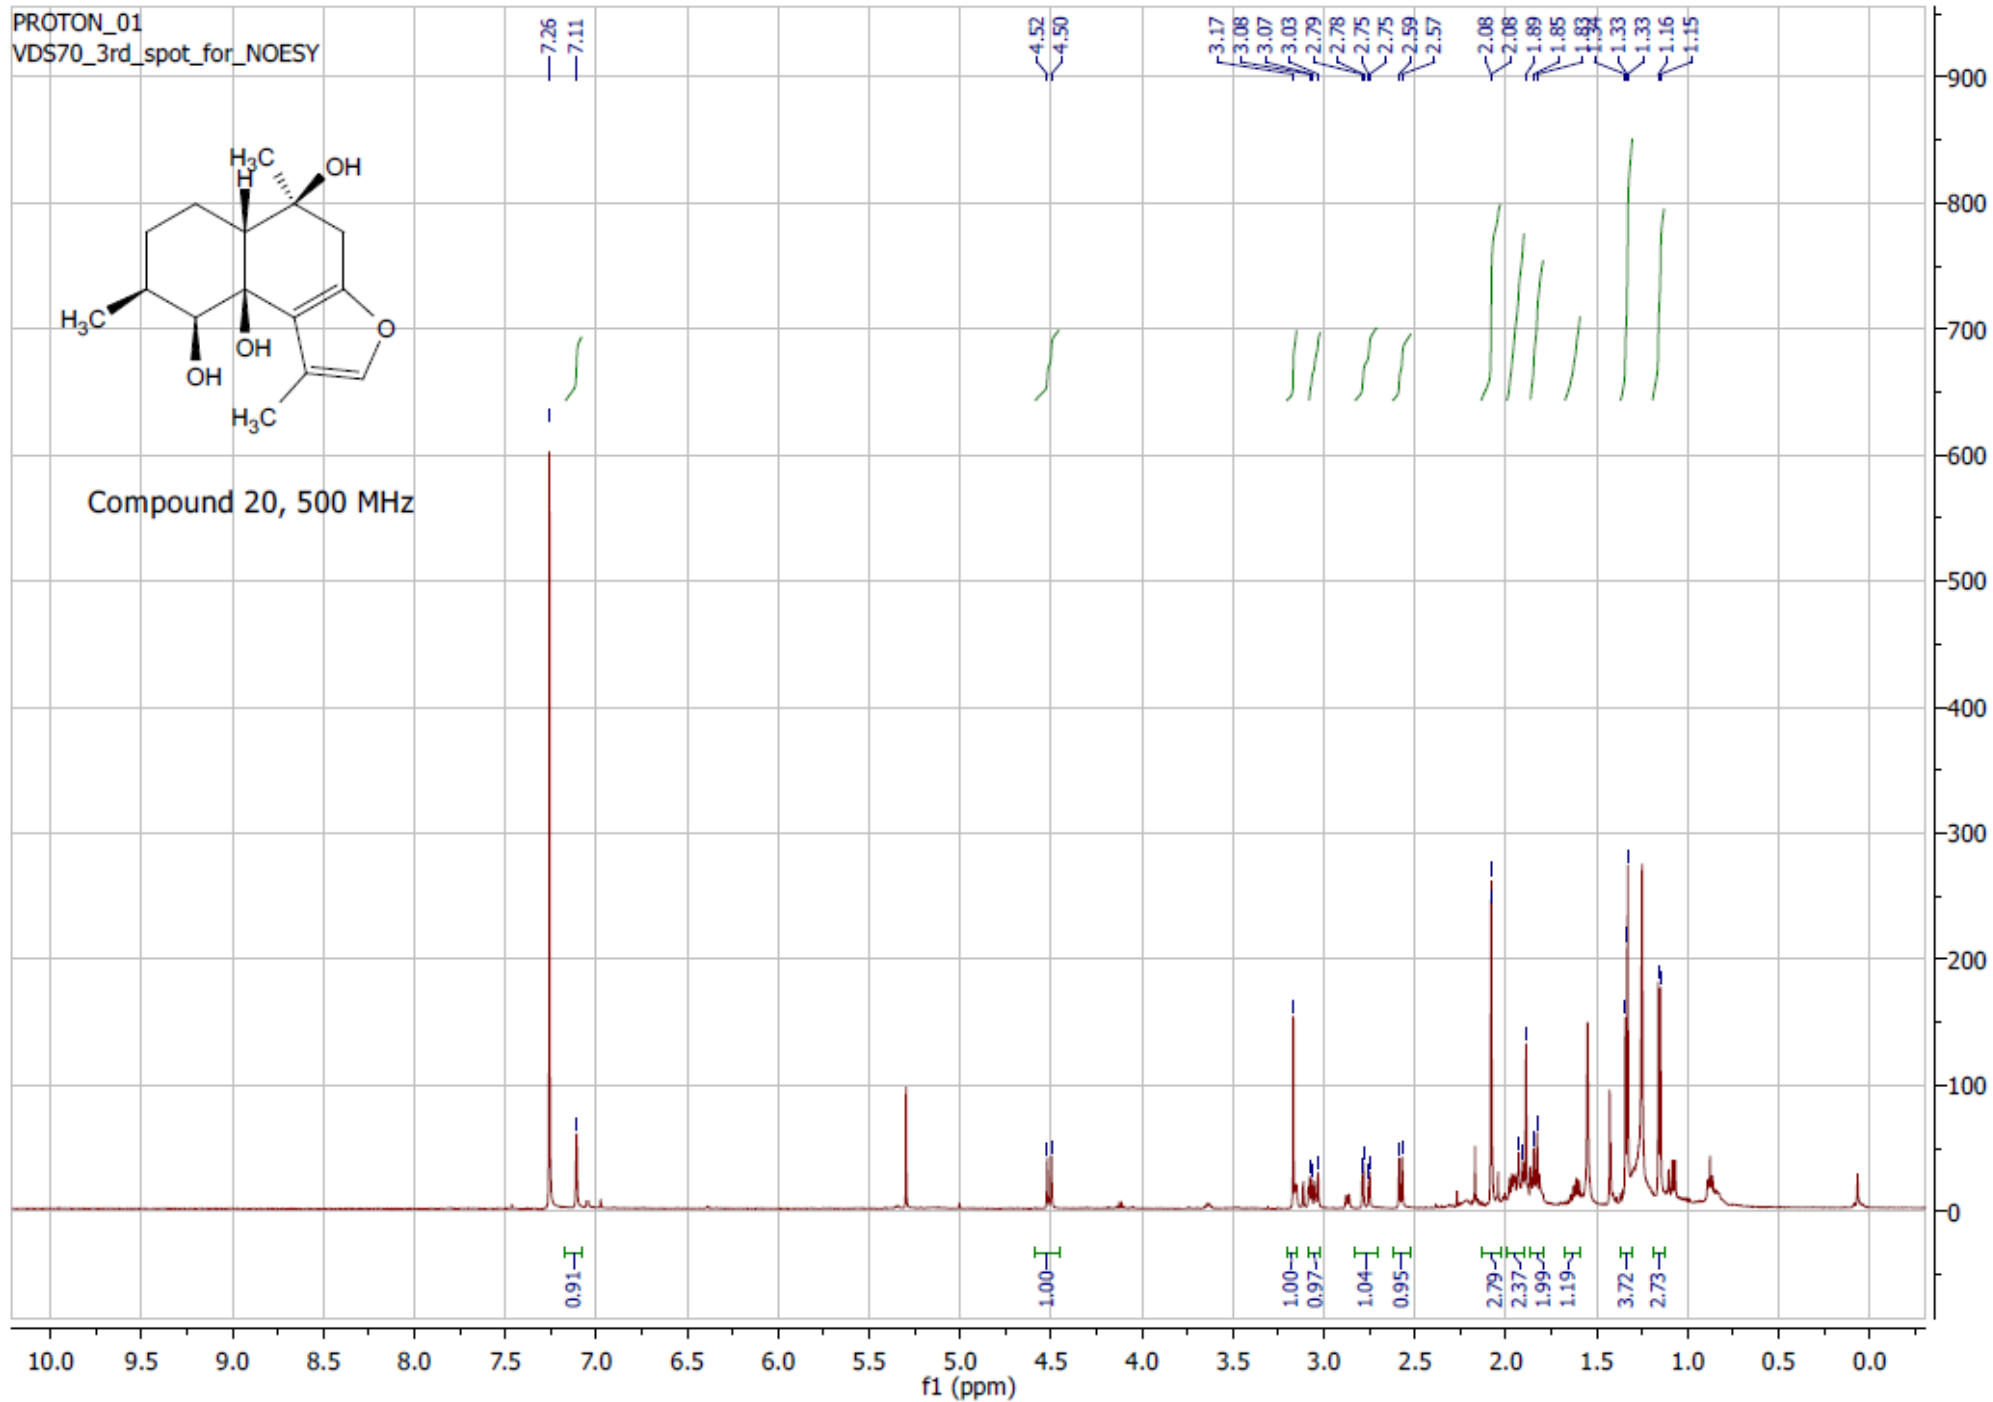



CARBON\_01  
VDS70\_3rd\_spot\_H9QC

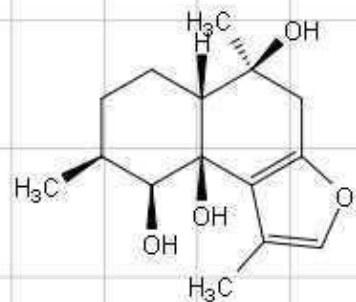

Compound 20, 125 MHz

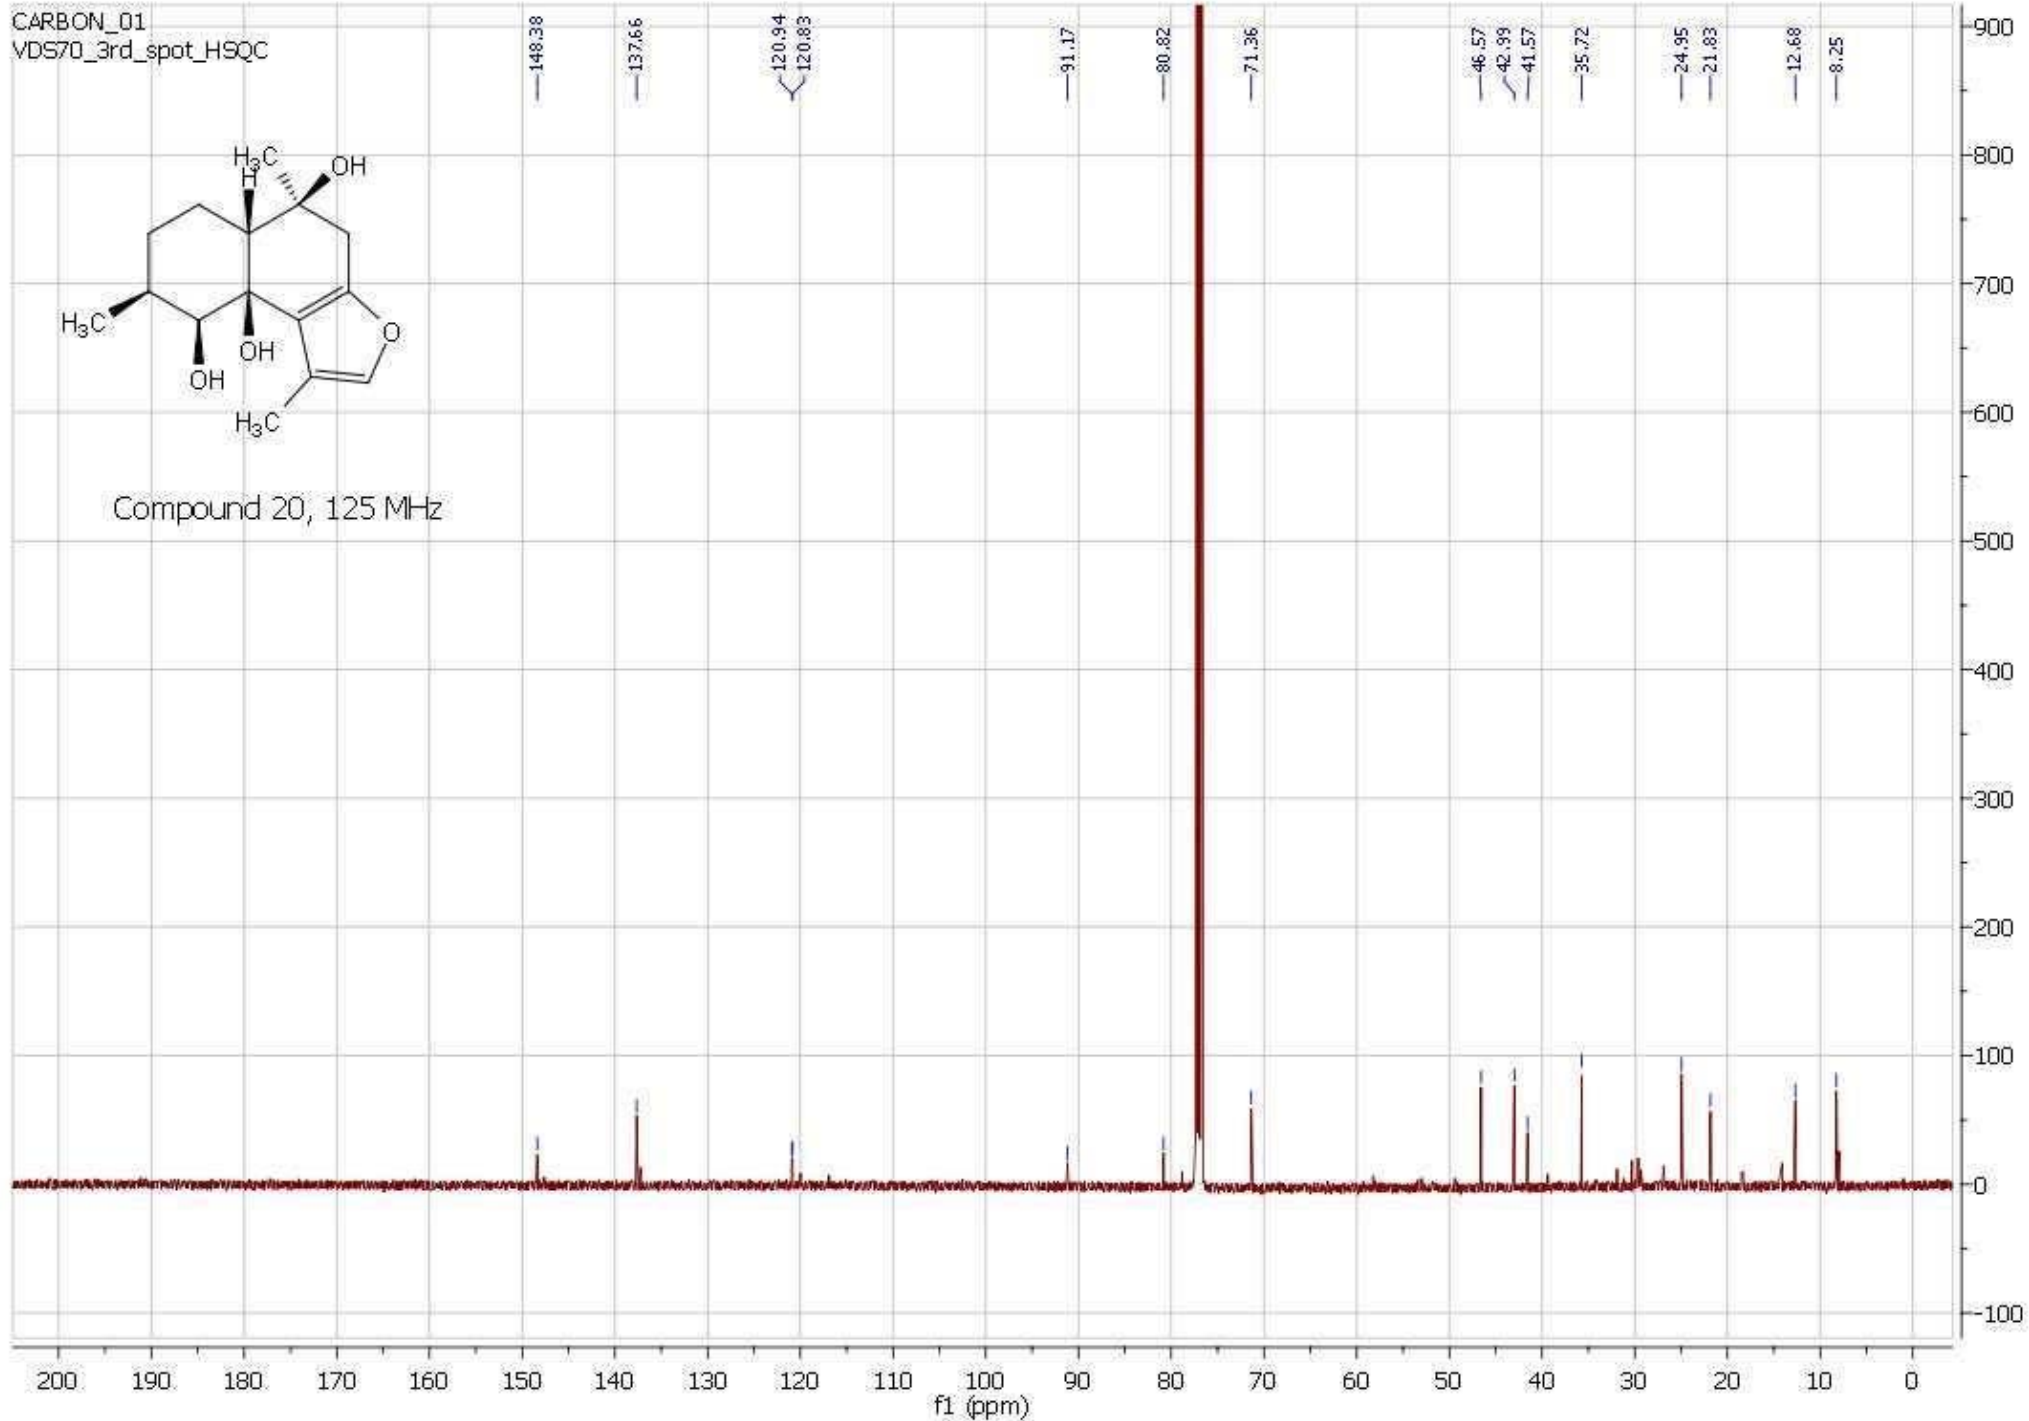

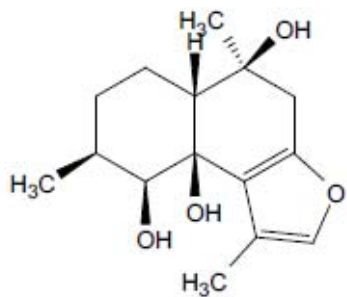

Compound 20, 500 MHz

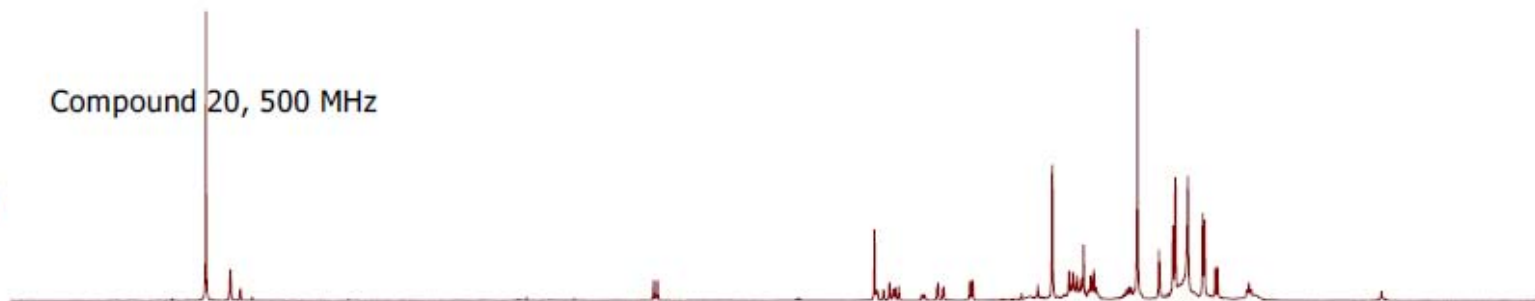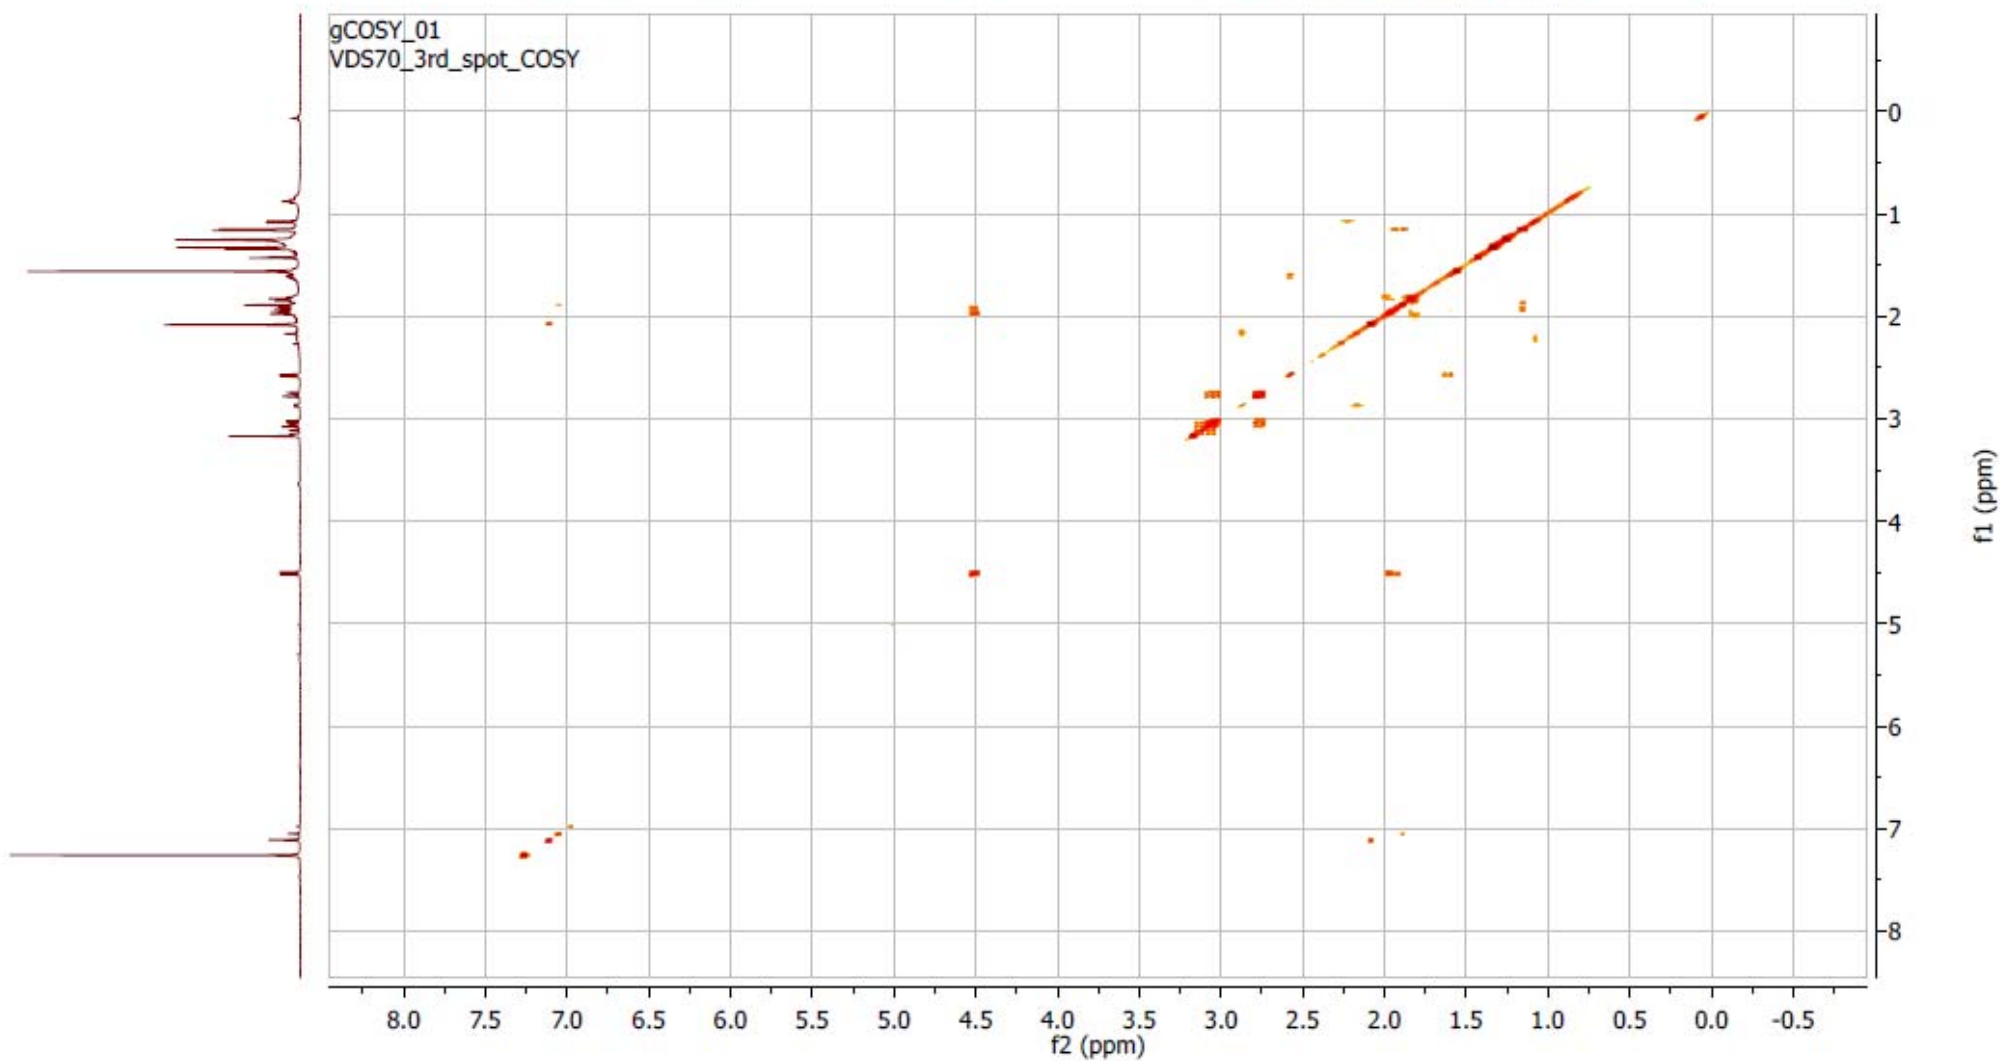

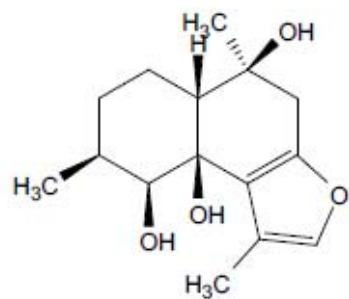

Compound 20, 500 MHz

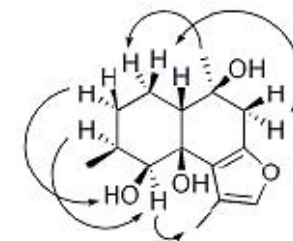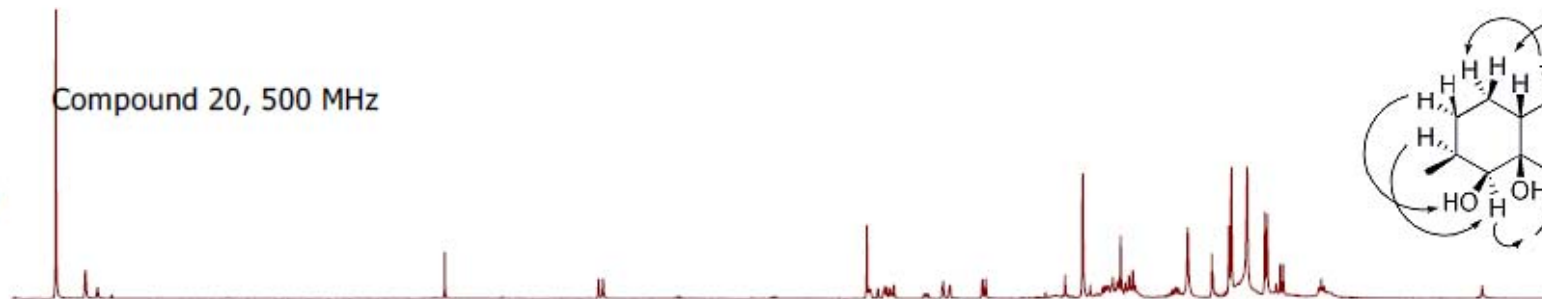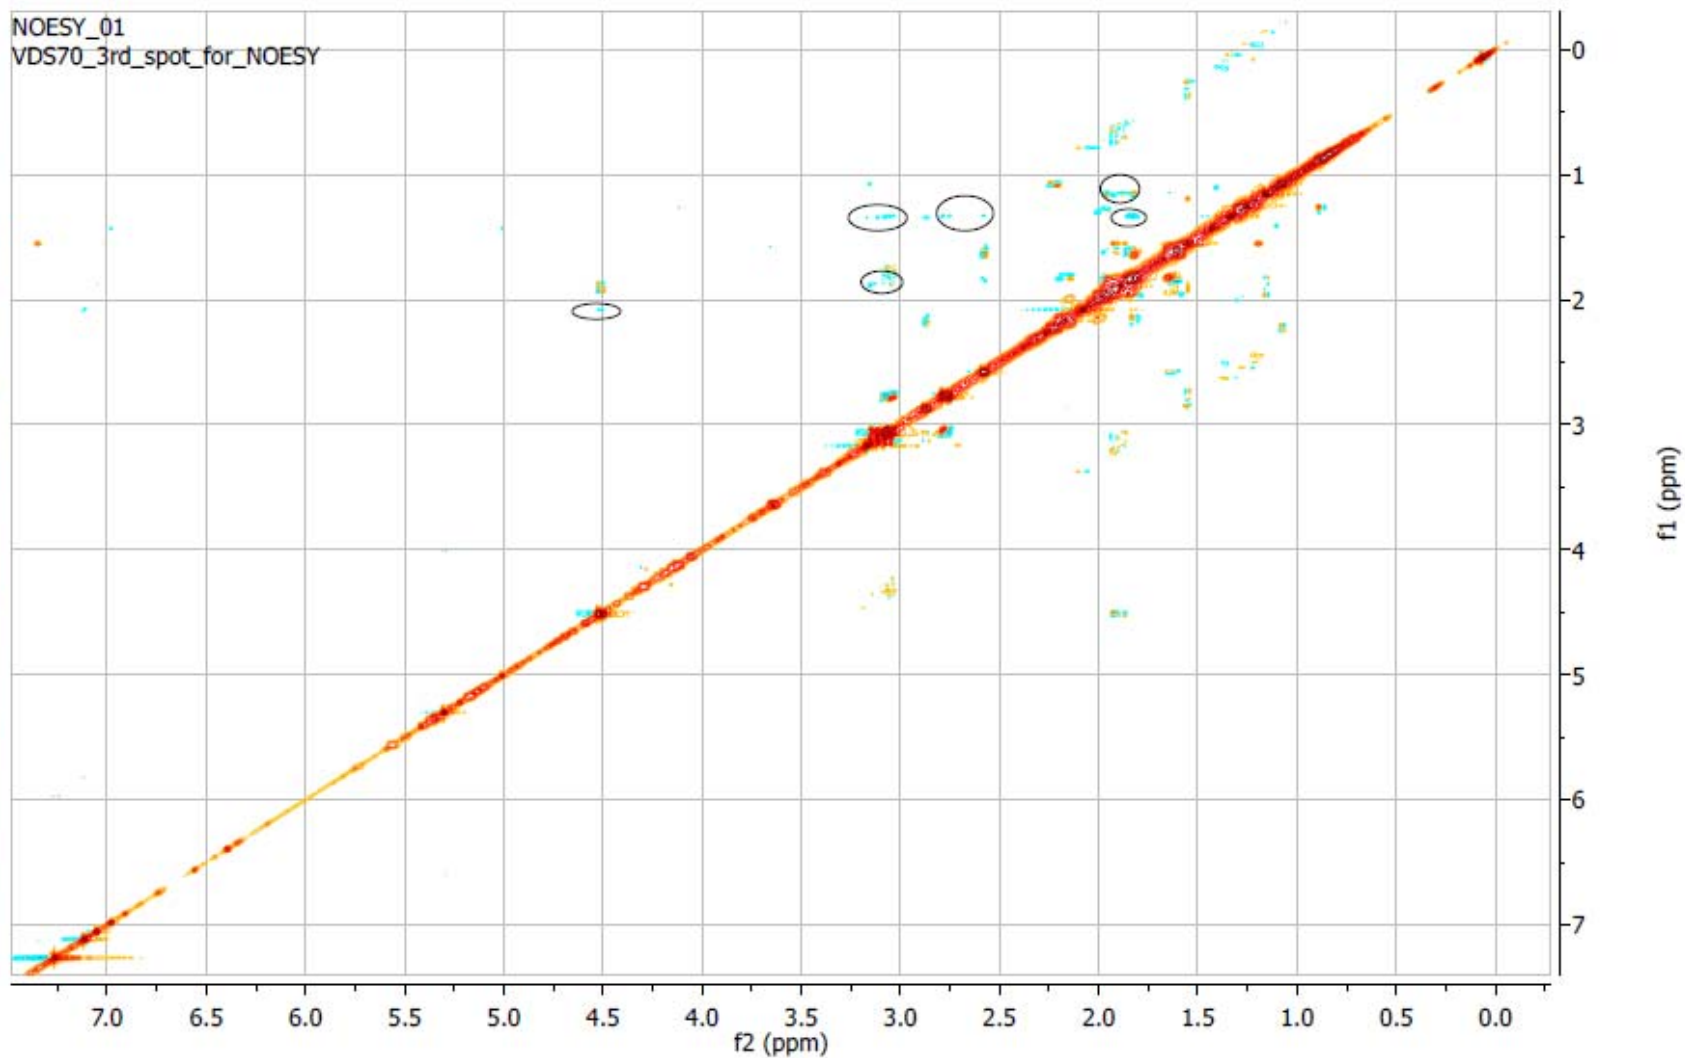

Supplement: c4cc09298h1.pdf [file c4cc09298h1.pdf]
